# Supplementary material for: Photoinduced catalytical reduction of carbonyl compounds using water as a hydrogen source
Source: Royal Society of Chemistry journal article supplement (doi:10.1039/d4qo01015a), 2024-01-01
Supplement: d4qo01015a1.pdf [file d4qo01015a1.pdf]

Supporting Information

*For*

**Photoinduced Catalytical Reduction of Carbonyl Compounds by Water as  
Hydrogen Source**

Shenhao Chen<sup>a</sup>, Chanjuan Xi<sup>\*a,b</sup>

<sup>a</sup>MOE Key Laboratory of Bioorganic Phosphorus Chemistry & Chemical Biology,  
Department of Chemistry, Tsinghua University, Beijing 100084, China.

<sup>b</sup>State Key Laboratory of Elemento-Organic Chemistry, Nankai University, Tianjin  
300071, China

Email: [cjxi@tsinghua.edu.cn](mailto:cjxi@tsinghua.edu.cn)

**List of the Contents**

|                                                                                                                             |     |
|-----------------------------------------------------------------------------------------------------------------------------|-----|
| 1. General Information.....                                                                                                 | S2  |
| 2. General Procedures for Synthesis of Substrates <b>1</b> .....                                                            | S4  |
| 3. General Procedures for Synthesis of Products <b>2 - 4</b> .....                                                          | S6  |
| 4. General Procedures for Mechanism Studies.....                                                                            | S8  |
| 5. Stern-Volmer Fluorescence Quenching Experiments.....                                                                     | S9  |
| 6. Experiments for the Recovery of PPh <sub>3</sub> , POPh <sub>3</sub> , and Thiophenol.....                               | S10 |
| 7. X-Ray Crystallography of the <i>meso</i> Isomer of <b>5d</b> .....                                                       | S15 |
| 8. Spectral Data for Synthesized Substrates.....                                                                            | S16 |
| 9. Spectral Data for All Products.....                                                                                      | S17 |
| 10. Scope of Unsuccessful Derivatized Examples .....                                                                        | S36 |
| 11. References .....                                                                                                        | S37 |
| 12. Copies of <sup>1</sup> H, <sup>13</sup> C{ <sup>1</sup> H}, <sup>19</sup> F NMR Spectra for Synthesized Compounds ..... | S39 |

## 1. General Information

Unless otherwise noted, all the reactions were carried out in oven-dried sealed tube with Teflon-lined-septum under  $N_2$  atmosphere. Materials were obtained from commercial sources and used as received, or synthesized according to previous literatures. Super dry acetonitrile with molecular sieves was use in the reaction.  $^1H$  NMR,  $^{13}C$  NMR, and  $^{19}F$  NMR spectra were recorded on 400 MHz at ambient temperature with  $CDCl_3$  as the solvent. Chemical shifts ( $\delta$ ) were given in ppm, referenced to the residual proton resonance of  $CDCl_3$  (7.26), to the carbon resonance of  $CDCl_3$  (77.16). Coupling constants ( $J$ ) were given in Hertz (Hz). The term m, q, t, d, and s referred to multiplet, quartet, triplet, doublet, and singlet. The reaction progress was monitored by GC-MS if applicable. Column chromatography was performed with silica gel (200-300 meshes). Thin layer chromatography (TLC) was visualized using UV light. HRMS(EI $^+$ ) analysis was performed on a Shimadzu GCMS-FT/TOF spectrometer.

The photoreactor used in this research was built by our group, which was made up of 4 blue LED bulbs (30 W for each) with 3 cooler fans to keep room temperature. Spectral distribution: 425 nm. In the reaction, each Schlenk tube is mainly irradiated by one of the light bulbs. The approximate distance of the tube to the closest light bulb is 2 cm. A magnetic stirrer is placed under the photoreactor to keep the reaction being stirred.

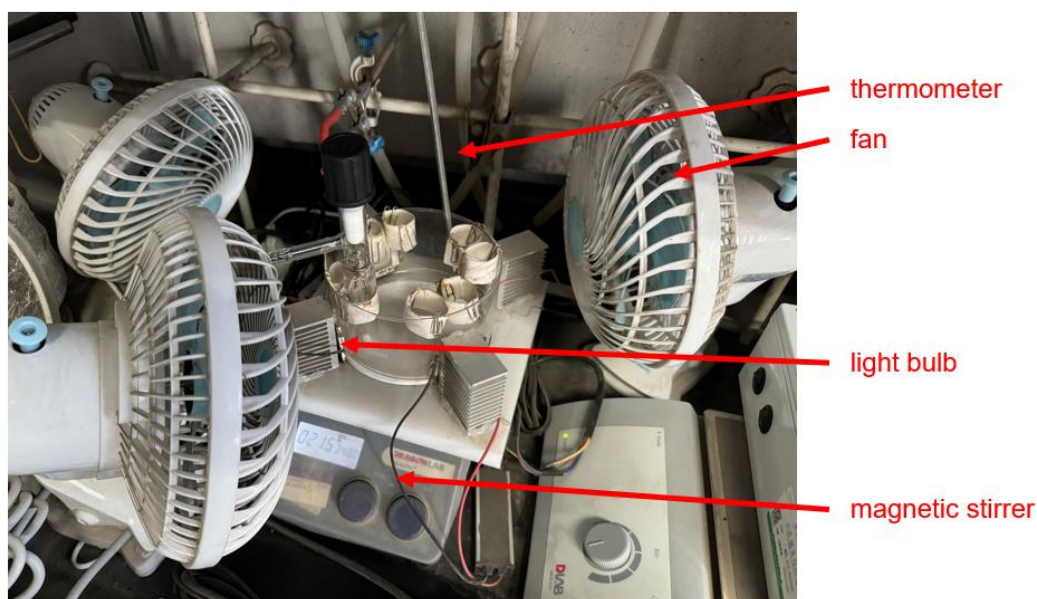

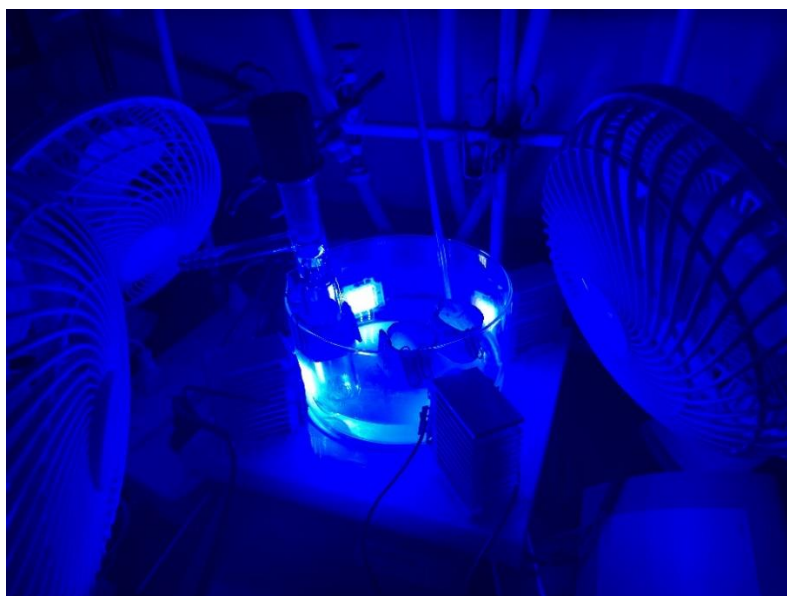

**Fig. S1** Photos of the photoreactor

## 2. General Procedures for Synthesis of Substrates 1:<sup>[1]</sup>

*General procedures for synthesis of substrates 1u:*

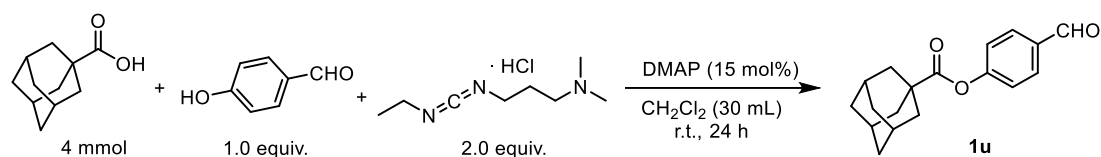

To a stirred solution of adamantane acid (4.00 mmol, 1.00 equiv.) and EDC·HCl (1-(3-dimethylaminopropyl)-3-ethylcarbodiimide hydrochloride) (6.00 mmol, 2.00 equiv.) in CH<sub>2</sub>Cl<sub>2</sub> (30 mL) were added DMAP (4-dimethylaminepyridine) (0.60 mmol, 0.15 equiv.) and 4-hydroxybenzaldehyde (4.00 mmol, 1.00 equiv.). The reaction mixture was stirred at 23 °C for 24 h, then concentrated *in vacuo*. The residue was purified by chromatography on silica gel to give products **1u**, which were identified by <sup>1</sup>H and <sup>13</sup>C NMR.

*General procedures for synthesis of substrates 1v:*

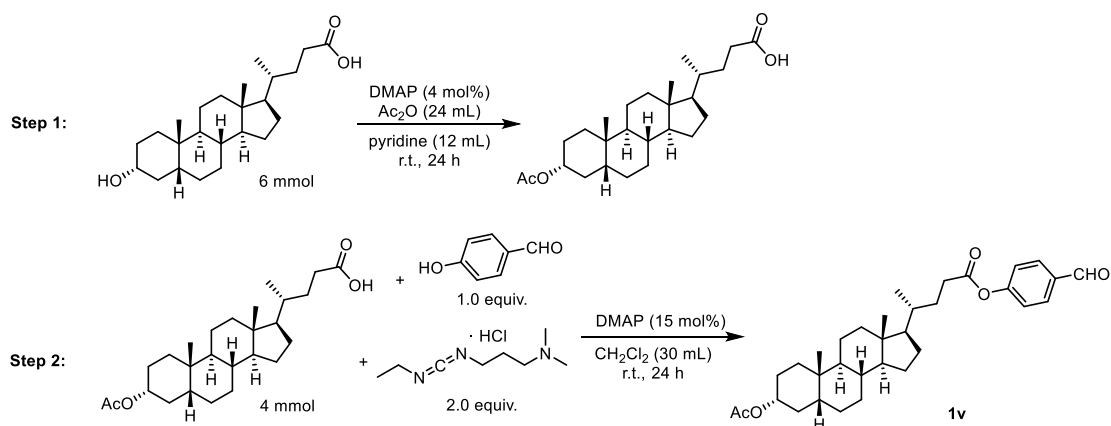

**Step 1:** To a solution of lithocholic acid (6.00 mmol) in pyridine (12 mL) was added acetic anhydride (24 mL) and DMAP (4-dimethylaminepyridine) (0.16 mmol). The reaction mixture was stirred at 23 °C for 24 h. The reaction was quenched with saturated CuSO<sub>4</sub> solution (120 mL) and extracted with ethyl acetate (180 mL). The organics were washed with H<sub>2</sub>O (120 mL) and brine (120 mL), dried over Na<sub>2</sub>SO<sub>4</sub>, and concentrated *in vacuo*. The residue was purified by chromatography on silica gel.

**Step 2:** To a stirred solution of acetate protected lithocholic acid (4.00 mmol, 1.00 equiv.) and EDC·HCl (6.00 mmol, 2.00 equiv.) in CH<sub>2</sub>Cl<sub>2</sub> (30 mL) were added

DMAP (4-dimethylaminepyridine) (0.60 mmol, 0.15 equiv.) and 4-hydroxybenzaldehyde (4.00 mmol, 1.00 equiv.). The reaction mixture was stirred at 23 °C for 24 h, then concentrated *in vacuo*. The residue was purified by chromatography on silica gel to give product **1v**, which was identified by <sup>1</sup>H and <sup>13</sup>C NMR.

### 3. General Procedures for Synthesis of Products 2 - 4:

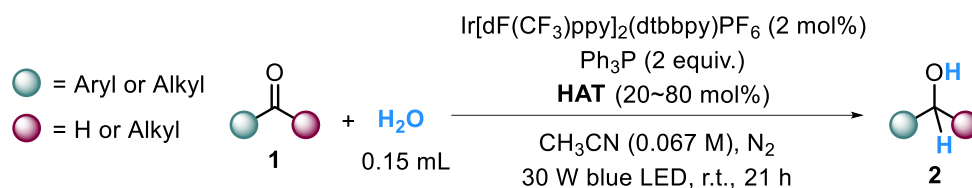

*General procedures for synthesis of products 2 and 4 (alcohols from unimolecular reduction and amines):* A sealed tube equipped with a stirrer bar was charged with  $\text{Ir}[\text{dF}(\text{CF}_3)\text{ppy}]_2(\text{dtbbpy})\text{PF}_6$  (4.4 mg, 2.0 mol%),  $\text{PPh}_3$  (104.9 mg, 2.0 equiv.), substrate **1** (0.2 mmol, for solid substrates), then degassed and refilled with  $\text{N}_2$  for 3 times. After that, anhydrous  $\text{CH}_3\text{CN}$  (3 mL), 4-*tert*-butylthiophenol (6.7 – 26.6 mg, 20 – 80 mol%),  $\text{H}_2\text{O}$  (0.15 mL), and substrate **1** (0.2 mmol, for liquid substrates) were added under  $\text{N}_2$ . The reaction mixture was irradiated by 30 W blue LEDs at room temperature for 21 hours, after which the reaction was concentrated *in vacuo*. The residue was purified by chromatography on silica gel to give products **2** and **4**, which were identified by  $^1\text{H}$ ,  $^{13}\text{C}$ , and  $^{19}\text{F}$  NMR.

*General procedures for the gram-scale synthesis of products 2a:* A sealed tube equipped with a stirrer bar was charged with  $\text{Ir}[\text{dF}(\text{CF}_3)\text{ppy}]_2(\text{dtbbpy})\text{PF}_6$  (0.176 g, 2.0 mol%),  $\text{PPh}_3$  (4.196 g, 2.0 equiv.), then degassed and refilled with  $\text{N}_2$  for 3 times. After that, anhydrous  $\text{CH}_3\text{CN}$  (120 mL), 4-*tert*-butylthiophenol (1.064 g, 80 mol%),  $\text{H}_2\text{O}$  (6.0 mL), and substrate **1a** (8 mmol, 0.960 g) were added under  $\text{N}_2$ . The reaction mixture was irradiated by 30 W blue LEDs at room temperature for 21 hours, after which the reaction was concentrated *in vacuo*. The residue was purified by chromatography on silica gel to give products **2a** (0.899 g, 92%), which was identified by  $^1\text{H}$  and  $^{13}\text{C}$  NMR.

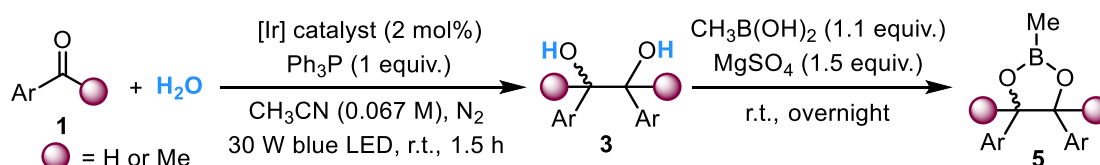

*General procedures for synthesis of products 3 (pinacols):* A sealed tube equipped with a stirrer bar was charged with  $\text{Ir}[\text{dF}(\text{CF}_3)\text{ppy}]_2(\text{dtbbpy})\text{PF}_6$  (4.4 mg, 2.0 mol%),  $\text{PPh}_3$  (52.5 mg, 1.0 equiv.), substrate **1** (0.2 mmol, for solid substrates), then degassed

and refilled with N<sub>2</sub> for 3 times. After that, anhydrous CH<sub>3</sub>CN (3 mL), H<sub>2</sub>O (0.15 mL), and substrate **1** (0.2 mmol, for liquid substrates) were added under N<sub>2</sub>. The reaction mixture was irradiated by 30 W blue LEDs at room temperature for 1.5 hours, after which the reaction was concentrated *in vacuo*. The residue was purified by chromatography on silica gel to give product **3**, which was identified by <sup>1</sup>H and <sup>13</sup>C NMR.

*General procedures for synthesis of products 5 (borate esters):* A sealed tube equipped with a stirrer bar was charged with Ir[dF(CF<sub>3</sub>)ppy]<sub>2</sub>(dtbbpy)PF<sub>6</sub> (4.4 mg, 2.0 mol%), PPh<sub>3</sub> (52.5 mg, 1.0 equiv.), substrate **1** (0.2 mmol, for solid substrates), then degassed and refilled with N<sub>2</sub> for 3 times. After that, anhydrous CH<sub>3</sub>CN (3 mL), H<sub>2</sub>O (0.15 mL), and substrate **1** (0.2 mmol, for liquid substrates) were added under N<sub>2</sub>. The reaction mixture was irradiated by 30 W blue LEDs at room temperature for 1.5 hours, after which CH<sub>3</sub>B(OH)<sub>2</sub> (13.2 mg, 1.1 equiv.), MgSO<sub>4</sub> (36.1 mg, 1.5 equiv.) were added, then stirred overnight. The residue was concentrated in vacuo and purified by chromatography on silica gel to give products **5**, which were identified by <sup>1</sup>H and <sup>13</sup>C NMR.

## 4. General Procedures for Mechanism Studies

### 4.1 Deuterium-labelled experiments

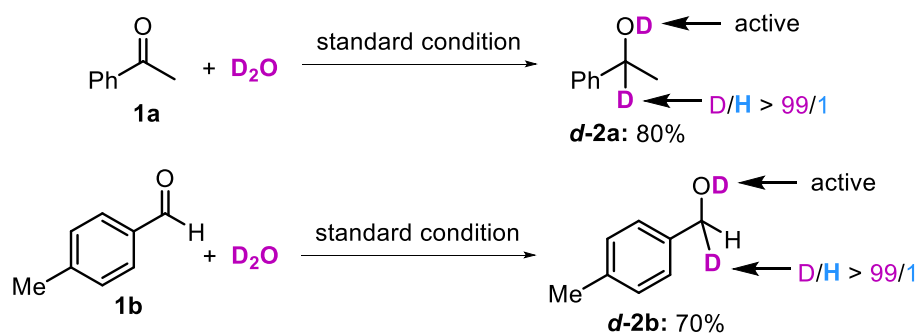

A sealed tube equipped with a stirrer bar was charged with Ir[dF(CF<sub>3</sub>)ppy]<sub>2</sub>(dtbbpy)PF<sub>6</sub> (4.4 mg, 2.0 mol%), PPh<sub>3</sub> (104.9 mg, 2.0 equiv.), then degassed and refilled with N<sub>2</sub> for 3 times. After that, anhydrous CH<sub>3</sub>CN (3 mL), 4-*tert*-butylthiophenol (6.7 – 26.6 mg, 20 – 80 mol%), H<sub>2</sub>O (0.15 mL), and substrate **1a** or **1b** (0.2 mmol) were added under N<sub>2</sub>. The reaction mixture was irradiated by 30 W blue LEDs at room temperature for 21 hours, after which the reaction was concentrated *in vacuo*. The residue was tested by <sup>1</sup>H NMR to determine the deuterium ratio.

### 4.2 Intermediate study

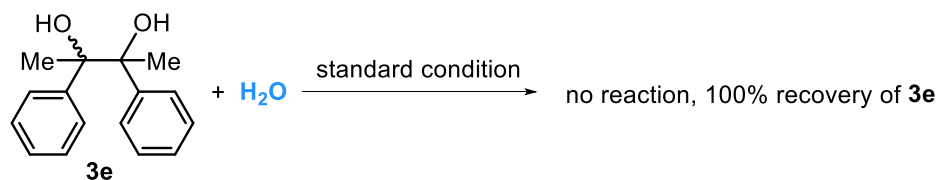

A sealed tube equipped with a stirrer bar was charged with Ir[dF(CF<sub>3</sub>)ppy]<sub>2</sub>(dtbbpy)PF<sub>6</sub> (4.4 mg, 2.0 mol%), PPh<sub>3</sub> (104.9 mg, 2.0 equiv.), pinacol **3e** (0.2 mmol), then degassed and refilled with N<sub>2</sub> for 3 times. After that, anhydrous CH<sub>3</sub>CN (3 mL), 4-*tert*-butylthiophenol (26.6 mg, 80 mol%), H<sub>2</sub>O (0.15 mL) were added under N<sub>2</sub>. The reaction mixture was irradiated by 30 W blue LEDs at room temperature for 21 hours, after which the reaction was concentrated *in vacuo*. The residue was tested by <sup>1</sup>H NMR to determine the result.



## 5. Stern-Volmer Fluorescence Quenching Experiments

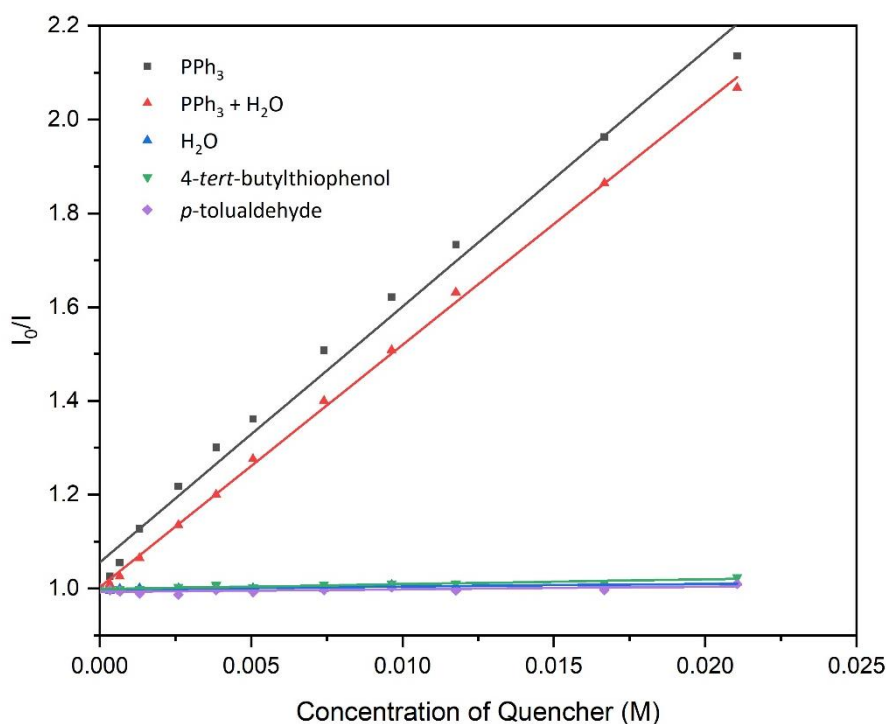

**Fig. S2** Fluorescence quenching experiment between photocatalyst and substrate

Fluorescence quenching experiments were measured on an Ahilent Technologies Cary Eclipse Fluorescence Spectrophotometer. The complex Ir[dF(CF<sub>3</sub>)ppy]<sub>2</sub>(dtbbpy) was excited at 375 nm and the emission spectrum max = 475 nm was recorded. Gradient dilution to get 1.0 x 10<sup>-5</sup> M Ir[dF(CF<sub>3</sub>)ppy]<sub>2</sub>(dtbbpy) solution in CH<sub>3</sub>CN, 0.1 M *p*-tolualdehyde (**2b**) solution in CH<sub>3</sub>CN, 0.1 M 4-*tert*-butylthiophenyl (**1a**) solution in CH<sub>3</sub>CN, 0.1 M PPh<sub>3</sub> (**3a**) solution in CH<sub>3</sub>CN, 0.1 M H<sub>2</sub>O (**3a**) solution in CH<sub>3</sub>CN, and 0.1 M PPh<sub>3</sub> + 0.1 M H<sub>2</sub>O solution in CH<sub>3</sub>CN. 3.0 mL 1.0 x 10<sup>-5</sup> M Ir[dF(CF<sub>3</sub>)ppy]<sub>2</sub>(dtbbpy) solution in CH<sub>3</sub>CN and a stirrer bar were added into the 4.0 mL quartz cuvette covered with Teflon cap. 10 μL of the above solutions were added each time, separately. Then, the emission spectrum of the solution was collected at each addition.

Quenching effects of various quenchers under different concentration were shown in Fig S1. Linear fit based on the Stern-Volmer equation was performed to calculate the Stern-Volmer constant (listed in Table S1).

$$\frac{I_0}{I} = 1 + K_{sv} \cdot [Q], \quad Q \text{ represents quencher}$$

**Table S1** Stern-Volmer constant of various quenchers

| Quencher                                 | Ph <sub>3</sub> P | Ph <sub>3</sub> P + H <sub>2</sub> O | H <sub>2</sub> O | 4- <i>tert</i> -butylthiophenol | <i>p</i> -tolualdehyde |
|------------------------------------------|-------------------|--------------------------------------|------------------|---------------------------------|------------------------|
| <i>K<sub>sv</sub></i> (M <sup>-1</sup> ) | 54.6              | 51.7                                 | 0.583            | 1.05                            | 0.563                  |

## 6. Experiments for The Recovery of PPh<sub>3</sub>, POPh<sub>3</sub>, and Thiophenol

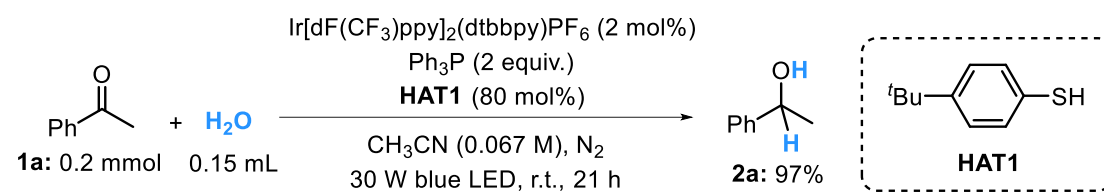

| Agents                          | PPh <sub>3</sub> | HAT1        | POPh <sub>3</sub> |
|---------------------------------|------------------|-------------|-------------------|
| Additive Amount                 | 2.00 equiv.      | 0.80 equiv. | -                 |
| Theoretically Remaining Amount  | 1.03 equiv.      | 0.80 equiv. | 0.97 equiv.       |
| Experimentally Recovered Amount | 0.60 equiv.      | 0.56 equiv. | 1.35 equiv.       |
| Recovery Yield                  | 58%              | 70%         | 140%              |

$$\text{Recovery rate} = \frac{\text{Theoretical Remaining}}{\text{Experimentally Recovered Amount}}$$

A sealed tube equipped with a stirrer bar was charged with Ir[dF(CF<sub>3</sub>)ppy]<sub>2</sub>(dtbbpy)PF<sub>6</sub> (4.4 mg, 2.0 mol%), PPh<sub>3</sub> (104.9 mg, 2.0 equiv.), then degassed and refilled with N<sub>2</sub> for 3 times. After that, anhydrous CH<sub>3</sub>CN (3 mL), 4-*tert*-butylthiophenol (26.6 mg, 80 mol%), H<sub>2</sub>O (0.15 mL), and substrate **1a** (0.2 mmol, for liquid substrates) were added under N<sub>2</sub>. The reaction mixture was irradiated by 30 W blue LEDs at room temperature for 21 hours, after which the reaction was concentrated in vacuo. The residue was purified by chromatography on silica gel to recover PPh<sub>3</sub>, **HAT1**, and POPh<sub>3</sub>, which were identified by <sup>1</sup>H and <sup>13</sup>C NMR.

PPh<sub>3</sub> could be recovered at a 58% yield (31.5 mg), while POPh<sub>3</sub> was recovered at a 140% yield (75.1 mg), among them, the excess 40% of POPh<sub>3</sub> was from the oxidation of PPh<sub>3</sub> by air at the work-up stage. The total recovery rate of phosphorus species was (58% + 140%) / 2 = 99%, indicating that PPh<sub>3</sub> and POPh<sub>3</sub> were quantificationally recyclable from the reaction.

**HAT1** could be recovered at a 70% yield, while about 30% of the **HAT1** was converted into diaryl disulfide through radical coupling reaction of the thiophenol radical as a side-reaction.

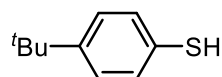

**4-*Tert*-butylthiophenol (HAT1):** colorless oil (18.6 mg, 0.56 equiv.). Eluent for the flash chromatography with silica gel: hexane / EA: 60/1.  $^1\text{H}$  NMR (400 MHz, CHLOROFORM-D)  $\delta$  7.27 – 7.21 (m, 4H), 3.38 (s, 1H), 1.29 (s, 9H).  $^{13}\text{C}$  NMR (101 MHz, CHLOROFORM-D)  $\delta$  149.1, 129.7, 127.0, 126.3, 34.5, 31.4. The spectroscopic data corresponds to the reported data.<sup>[2]</sup>

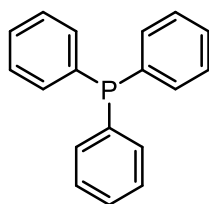

**Triphenylphosphine (PPh<sub>3</sub>):** white solid (31.5 mg, 0.60 equiv.). Eluent for the flash chromatography with silica gel: hexane / EA: 10/1.  $^1\text{H}$  NMR (400 MHz, CHLOROFORM-D)  $\delta$  7.32 – 7.29 (m, 15H).  $^{13}\text{C}$  NMR (101 MHz, CHLOROFORM-D)  $\delta$  137.3 (d,  $J$  = 11.1 Hz), 133.9 (d,  $J$  = 20.2 Hz), 128.8, 128.6 (d,  $J$  = 7.1 Hz). The spectroscopic data corresponds to the reported data.<sup>[3]</sup>

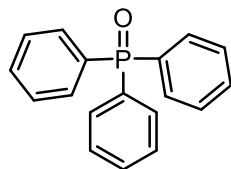

**Triphenylphosphine oxide (OPh<sub>3</sub>):** white solid (75.1 mg, 1.35 equiv.). Eluent for the flash chromatography with silica gel: CH<sub>2</sub>Cl<sub>2</sub> / MeOH: 10/1.  $^1\text{H}$  NMR (400 MHz, CHLOROFORM-D)  $\delta$  7.70 – 7.64 (m, 6H), 7.53 – 7.49 (m, 3H), 7.45 – 7.41 (m, 6H).  $^{13}\text{C}$  NMR (101 MHz, CHLOROFORM-D)  $\delta$  132.9, 131.9 (d,  $J$  = 10.1 Hz), 131.8 (d,  $J$  = 3.0 Hz), 128.4 (d,  $J$  = 13.1 Hz). The spectroscopic data corresponds to the reported data.<sup>[4]</sup>

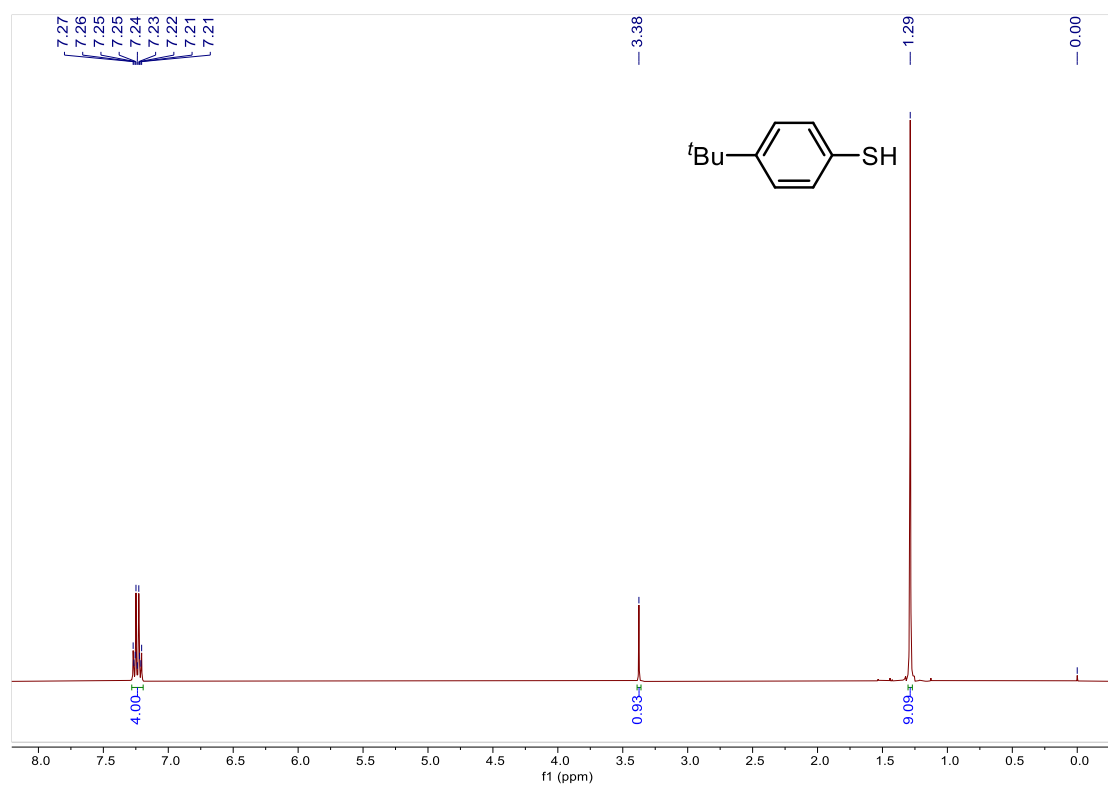

<sup>1</sup>H NMR for compound **HAT1**

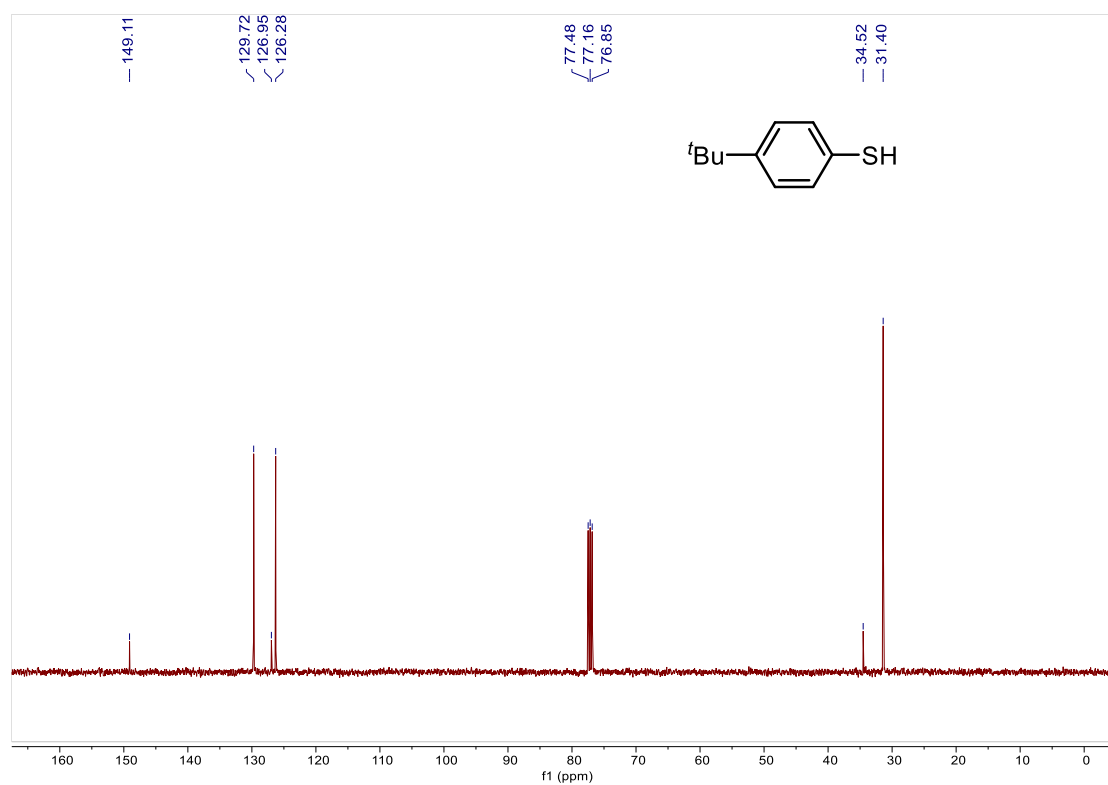

<sup>13</sup>C{<sup>1</sup>H} NMR for compound **HAT1**

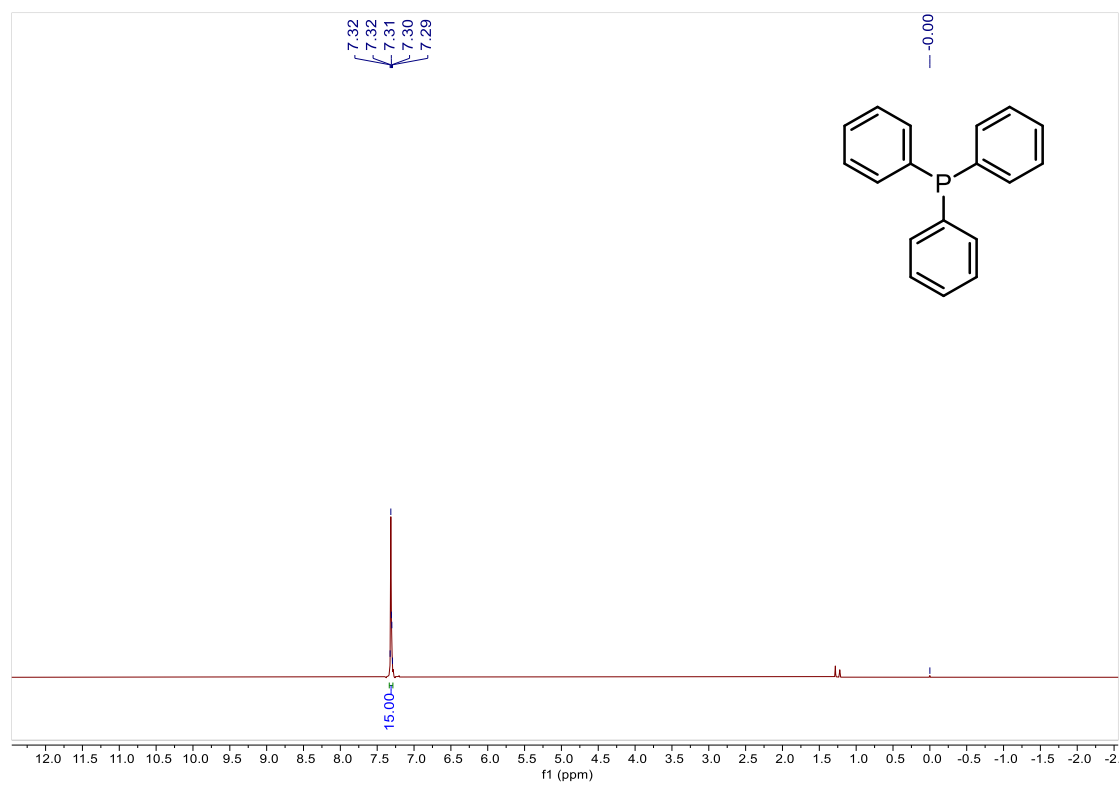

<sup>1</sup>H NMR for compound **PPh<sub>3</sub>**

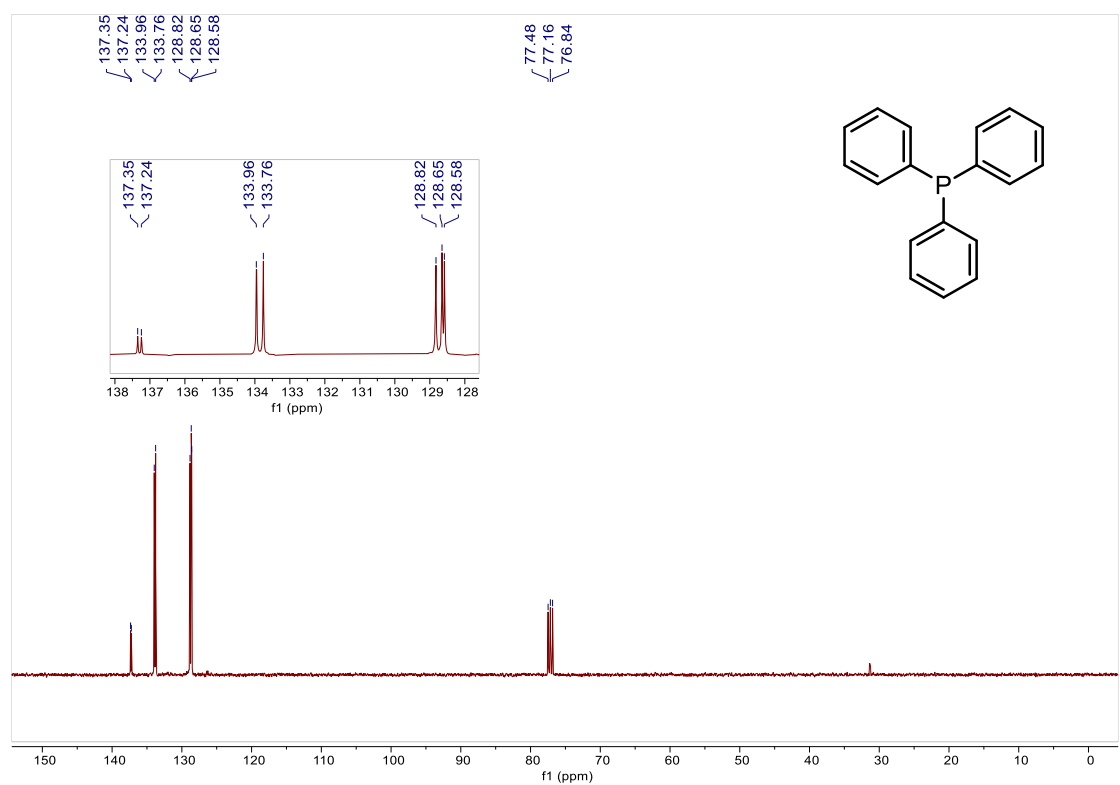

<sup>13</sup>C{<sup>1</sup>H} NMR for compound **PPh<sub>3</sub>**

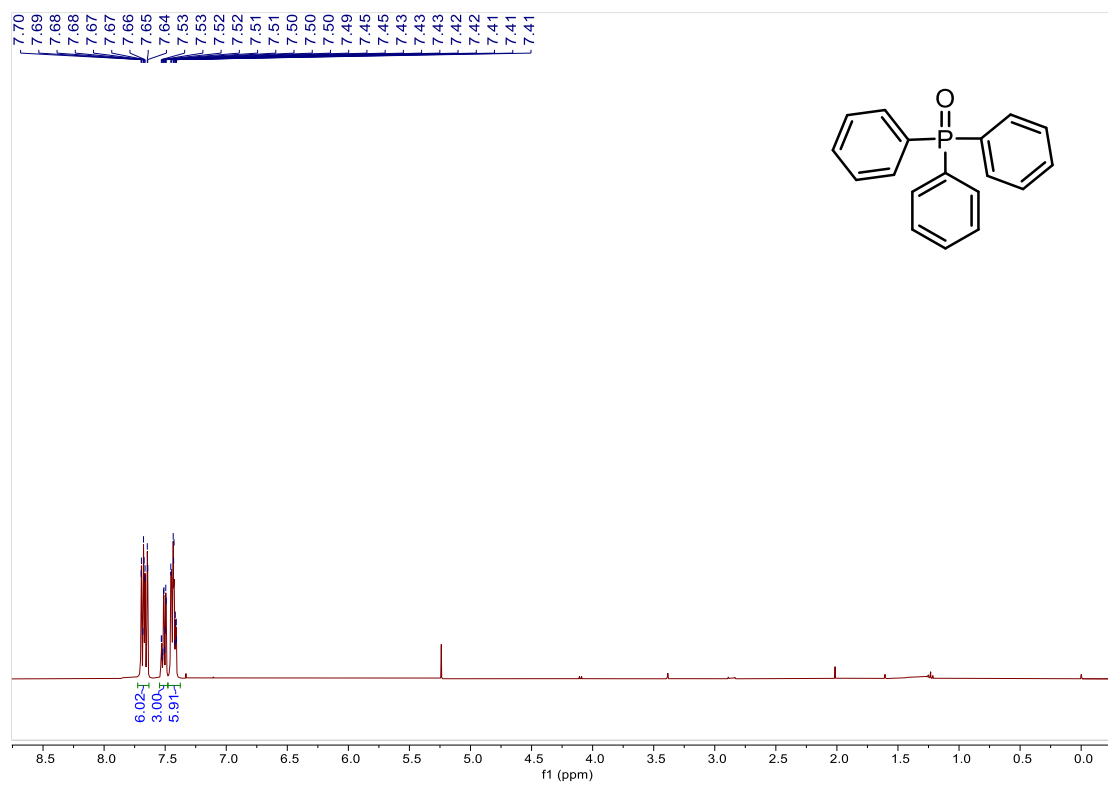

<sup>1</sup>H NMR for compound **POPh<sub>3</sub>**

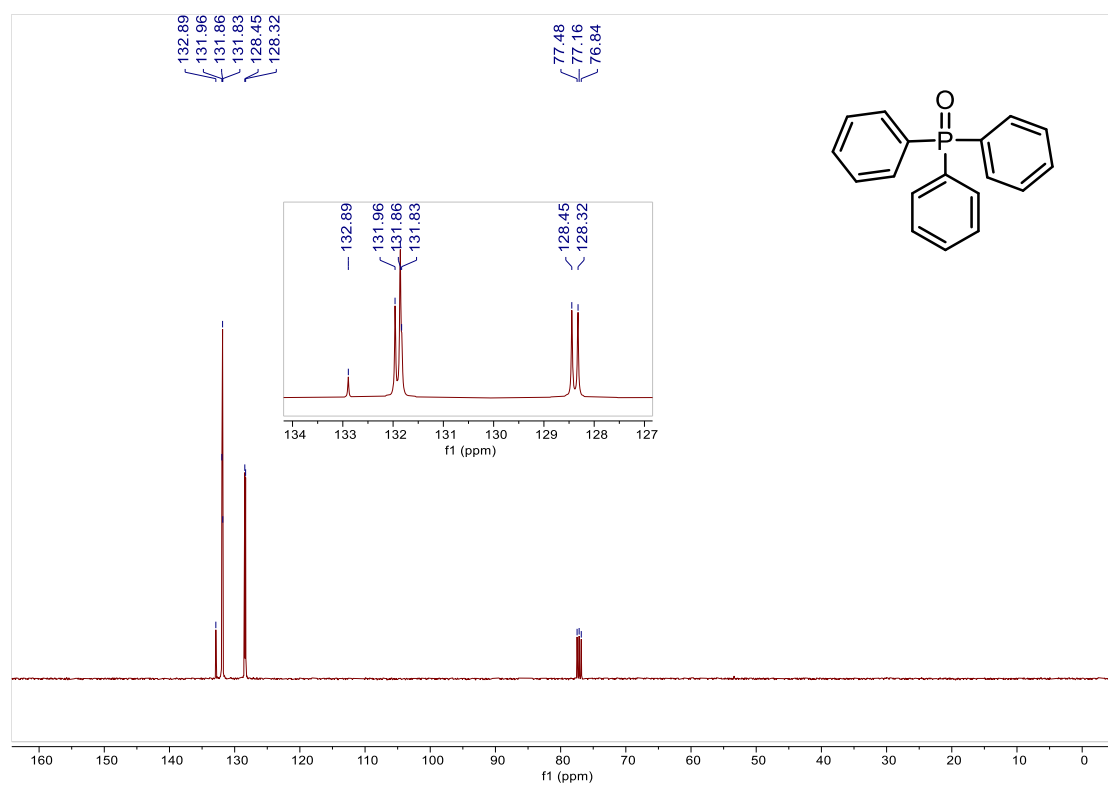

<sup>13</sup>C{<sup>1</sup>H} NMR for compound **POPh<sub>3</sub>**

## 7. X-Ray Crystallography of the *meso* Isomer of 5d

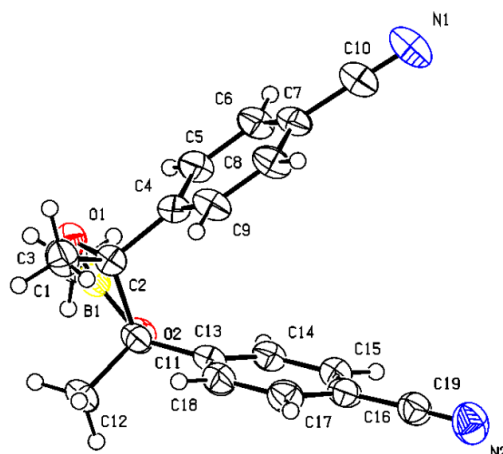

\*ORTEP diagram of **5d** (*meso*) with the thermal ellipsoids shown at the 30% probability level. All hydrogen atoms have been omitted for clarity.

### Crystal data and structure refinement for **5d** (*meso*)

|                                             |                                                                              |
|---------------------------------------------|------------------------------------------------------------------------------|
| Empirical formula                           | C <sub>38</sub> H <sub>34</sub> B <sub>2</sub> N <sub>4</sub> O <sub>4</sub> |
| Formula weight                              | 632.31                                                                       |
| Temperature/K                               | 169.98(10)                                                                   |
| Crystal system                              | triclinic                                                                    |
| Space group                                 | P-1                                                                          |
| a/Å                                         | 8.1573(4)                                                                    |
| b/Å                                         | 9.2437(8)                                                                    |
| c/Å                                         | 24.5989(10)                                                                  |
| α/°                                         | 86.636(5)                                                                    |
| β/°                                         | 89.592(4)                                                                    |
| γ/°                                         | 66.992(6)                                                                    |
| Volume/Å <sup>3</sup>                       | 1704.1(2)                                                                    |
| Z                                           | 2                                                                            |
| ρ <sub>calc</sub> g/cm <sup>3</sup>         | 1.232                                                                        |
| μ/mm <sup>-1</sup>                          | 0.637                                                                        |
| F(000)                                      | 664.0                                                                        |
| Crystal size/mm <sup>3</sup>                | 0.18 × 0.15 × 0.1                                                            |
| Radiation                                   | Cu Kα (λ = 1.54184)                                                          |
| 2θ range for data collection/°              | 3.598 to 172.506                                                             |
| Index ranges                                | -9 ≤ h ≤ 10, -11 ≤ k ≤ 11, -30 ≤ l ≤ 30                                      |
| Reflections collected                       | 18711                                                                        |
| Independent reflections                     | 6844 [R <sub>int</sub> = 0.0636, R <sub>sigma</sub> = 0.0571]                |
| Data/restraints/parameters                  | 6844/0/439                                                                   |
| Goodness-of-fit on F <sup>2</sup>           | 1.097                                                                        |
| Final R indexes [I ≥ 2σ (I)]                | R <sub>1</sub> = 0.0891, wR <sub>2</sub> = 0.2375                            |
| Final R indexes [all data]                  | R <sub>1</sub> = 0.1099, wR <sub>2</sub> = 0.2502                            |
| Largest diff. peak/hole / e Å <sup>-3</sup> | 0.41/-0.41                                                                   |
| CCDC Number: 2328828                        |                                                                              |

## 8. Spectra Data for Synthesized Substrates

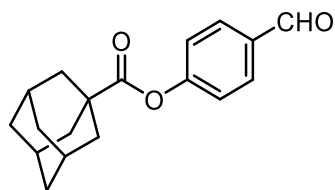

**4-Formylphenyl adamantane-1-carboxylate (1u):**  $^1\text{H}$  NMR (400 MHz, CHLOROFORM-D)  $\delta$  9.99 (s, 1H), 7.91 (d,  $J$  = 8.5 Hz, 2H), 7.23 (d,  $J$  = 8.5 Hz, 2H), 2.10 (s, 3H), 2.06 (s, 6H), 1.81 – 1.74 (m, 6H).  $^{13}\text{C}$  NMR (101 MHz, CHLOROFORM-D)  $\delta$  191.1, 175.6, 156.1, 133.9, 131.3, 122.5, 41.3, 38.8, 36.5, 27.9. The spectroscopic data corresponds to the reported data.<sup>[1]</sup>

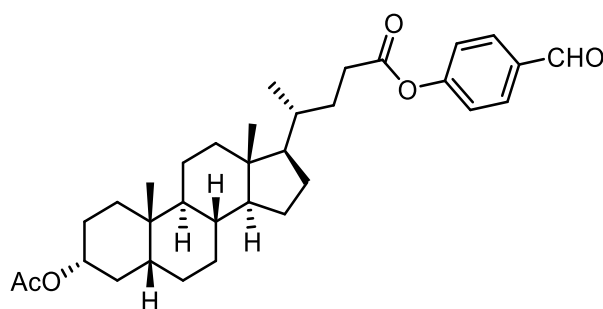

**4-Formylphenyl (R)-4-((3R,5R,8R,9S,10S,13R,14S,17R)-3-acetoxy-10,13-dimethylhexadecahydro-1H-cyclopenta[a]phenanthren-17-yl)pentanoate (1v):**  $^1\text{H}$  NMR (400 MHz, CHLOROFORM-D)  $\delta$  9.98 (s, 1H), 7.91 (d,  $J$  = 8.3 Hz, 2H), 7.27 (d,  $J$  = 8.7 Hz, 2H), 4.71 (dq,  $J$  = 11.5, 5.7 Hz, 1H), 2.64 (ddd,  $J$  = 15.1, 9.9, 5.0 Hz, 1H), 2.55 – 2.46 (m, 1H), 2.03 (s, 3H), 1.97 – 1.79 (m, 6H), 1.56 – 1.37 (m, 11H), 1.28 – 1.06 (m, 9H), 0.99 (d,  $J$  = 6.4 Hz, 3H), 0.93 (s, 3H), 0.67 (s, 3H).  $^{13}\text{C}$  NMR (101 MHz, CHLOROFORM-D)  $\delta$  190.9, 172.0, 170.6, 155.5, 133.9, 131.2, 122.4, 74.4, 56.5, 56.0, 42.8, 41.9, 40.4, 40.2, 35.8, 35.4, 35.0, 34.6, 32.2, 31.4, 28.3, 27.0, 26.6, 26.3, 24.2, 23.4, 21.5, 20.8, 18.3, 12.1. The spectroscopic data corresponds to the reported data.<sup>[1]</sup>



## 9. Spectral Data for All Products

For products with diastereoisomers, **3a-3c**, **3f** were isolated and characterized as the mixture of the *dl* and *meso* isomer, while the *dl* and *meso* isomer of **3d**, **3e**, **5a-5d** were isolated and characterized separately.

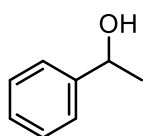

**1-Phenylethanol (2a):** colorless oil (24.2 mg, 99%). Eluent for the flash chromatography with silica gel: hexane / EA: 5/1.  $^1\text{H}$  NMR (400 MHz, CHLOROFORM-D)  $\delta$  7.37 – 7.32 (m, 4H), 7.28 – 7.23 (m, 1H), 4.86 (q,  $J$  = 6.4 Hz, 1H), 2.09 (s, 1H), 1.47 (d,  $J$  = 6.4 Hz, 3H).  $^{13}\text{C}$  NMR (101 MHz, CHLOROFORM-D)  $\delta$  145.9, 128.6, 127.6, 125.5, 70.5, 25.2. The spectroscopic data corresponds to the reported data.<sup>[5]</sup>

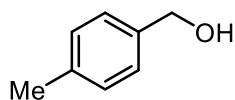

**4-Methylbenzyl alcohol (2b):** colorless oil (23.7 mg, 99%). Eluent for the flash chromatography with silica gel: hexane / ethyl acetate (EA): 5/1.  $^1\text{H}$  NMR (400 MHz, CHLOROFORM-D)  $\delta$  7.23 (d,  $J$  = 7.8 Hz, 2H), 7.15 (d,  $J$  = 7.8 Hz, 2H), 4.60 (s, 2H), 2.34 (s, 3H), 1.96 (s, 1H).  $^{13}\text{C}$  NMR (101 MHz, CHLOROFORM-D)  $\delta$  138.0, 137.4, 129.3, 127.2, 65.3, 21.2. The spectroscopic data corresponds to the reported data.<sup>[5]</sup>

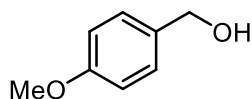

**4-Methoxybenzyl alcohol (2c):** colorless oil (25.9 mg, 95%). Eluent for the flash chromatography with silica gel: hexane / EA: 2/1.  $^1\text{H}$  NMR (400 MHz, CHLOROFORM-D)  $\delta$  7.30 – 7.25 (m, 2H), 6.91 – 6.85 (m, 2H), 4.59 (s, 2H), 3.80 (s, 3H), 1.85 (s, 1H).  $^{13}\text{C}$  NMR (101 MHz, CHLOROFORM-D)  $\delta$  159.3, 133.2, 128.8, 114.0, 65.1, 55.4. The spectroscopic data corresponds to the reported data.<sup>[5]</sup>

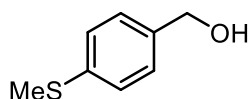

**4-(Methylthio)benzyl alcohol (2d):** light yellow solid (30.5 mg, 99%). Eluent for the flash chromatography with silica gel: hexane / EA: 2/1.  $^1\text{H}$  NMR (400 MHz, CHLOROFORM-D)  $\delta$  7.29 – 7.23 (m, 4H), 4.63 (s, 2H), 2.48 (s, 3H), 1.83 (s, 1H).  $^{13}\text{C}$  NMR (101 MHz, CHLOROFORM-D)  $\delta$  137.9, 137.9, 127.8, 126.9, 65.0, 16.1. The spectroscopic data corresponds to the reported data.<sup>[6]</sup>

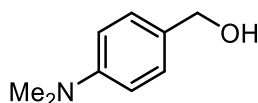

***N,N*-dimethyl-4-hydroxymethylaniline (2e):** colorless oil (29.9 mg, 99%). Eluent for the flash chromatography with silica gel: hexane / EA: 2/1.  $^1\text{H}$  NMR (400 MHz, CHLOROFORM-D)  $\delta$  7.25 – 7.19 (m, 2H), 6.74 – 6.68 (m, 2H), 4.53 (s, 2H), 2.93 (s, 6H), 1.82 (s, 1H).  $^{13}\text{C}$  NMR (101 MHz, CHLOROFORM-D)  $\delta$  150.4, 129.0, 128.7, 112.7, 65.4, 40.8. The spectroscopic data corresponds to the reported data.<sup>[6]</sup>

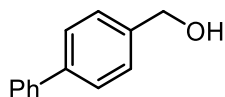

**Biphenyl-4-yl methanol (2f):** white solid (24.0 mg, 65%). Eluent for the flash chromatography with silica gel: hexane / EA: 5/1.  $^1\text{H}$  NMR (400 MHz, CHLOROFORM-D)  $\delta$  7.57 (m, 4H), 7.47 – 7.41 (m, 4H), 7.37 – 7.32 (m, 1H), 4.73 (d,  $J$  = 4.6 Hz, 2H), 1.75 (s, 1H).  $^{13}\text{C}$  NMR (101 MHz, CHLOROFORM-D)  $\delta$  141.0, 140.8, 140.0, 128.9, 127.6, 127.5, 127.5, 127.2, 65.2. The spectroscopic data corresponds to the reported data.<sup>[7]</sup>

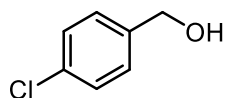

**4-Chlorobenzyl alcohol (2g):** colorless oil (15.1 mg, 53%). Eluent for the flash chromatography with silica gel: hexane / EA: 2/1.  $^1\text{H}$  NMR (400 MHz, CHLOROFORM-D)  $\delta$  7.35 – 7.26 (m, 4H), 4.66 (s, 2H), 1.75 (s, 1H).  $^{13}\text{C}$  NMR (101

MHz, CHLOROFORM-D)  $\delta$  139.4, 133.5, 128.8, 128.4, 64.7. The spectroscopic data corresponds to the reported data.<sup>[7]</sup>

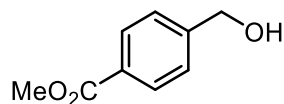

**4-(Methoxycarbonyl)benzyl alcohol (2h):** white solid (7.0 mg, 21%). Eluent for the flash chromatography with silica gel: hexane / EA: 2/1. <sup>1</sup>H NMR (400 MHz, CHLOROFORM-D)  $\delta$  8.03 (d,  $J$  = 8.3 Hz, 2H), 7.43 (d,  $J$  = 8.3 Hz, 2H), 4.77 (s, 2H), 3.92 (s, 3H), 1.87 (s, 1H). <sup>13</sup>C NMR (101 MHz, CHLOROFORM-D)  $\delta$  167.1, 146.1, 130.0, 129.5, 126.6, 64.9, 52.3. The spectroscopic data corresponds to the reported data.<sup>[7]</sup>

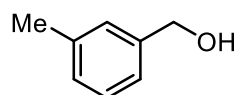

**3-Methylbenzyl alcohol (2i):** colorless oil (22.7 mg, 93%). Eluent for the flash chromatography with silica gel: hexane / EA: 5/1. <sup>1</sup>H NMR (400 MHz, CHLOROFORM-D)  $\delta$  7.25 (t,  $J$  = 7.6 Hz, 1H), 7.20 – 7.07 (m, 3H), 4.63 (s, 2H), 2.35 (s, 3H), 1.84 (s, 1H). <sup>13</sup>C NMR (101 MHz, CHLOROFORM-D)  $\delta$  140.9, 138.4, 128.6, 128.5, 127.9, 124.2, 65.5, 21.5. The spectroscopic data corresponds to the reported data.<sup>[5]</sup>

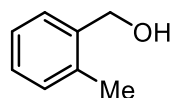

**2-Methylbenzyl alcohol (2j):** colorless oil (22.5 mg, 92%). Eluent for the flash chromatography with silica gel: hexane / EA: 5/1. <sup>1</sup>H NMR (400 MHz, CHLOROFORM-D)  $\delta$  7.37 – 7.31 (m, 1H), 7.24 – 7.14 (m, 3H), 4.67 (s, 2H), 2.35 (s, 3H), 1.72 (s, 1H). <sup>13</sup>C NMR (101 MHz, CHLOROFORM-D)  $\delta$  138.8, 136.2, 130.4, 127.9, 127.6, 126.2, 63.6, 18.8. The spectroscopic data corresponds to the reported data.<sup>[5]</sup>

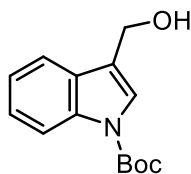

**Tert-butyl 3-hydroxymethylindole-1-carboxylate (2k):** colorless oil (28.5 mg, 58%). Eluent for the flash chromatography with silica gel: hexane / EA: 2/1.  $^1\text{H}$  NMR (400 MHz, CHLOROFORM-D)  $\delta$  8.14 (d,  $J = 7.8$  Hz, 1H), 7.64 (d,  $J = 7.8$  Hz, 1H), 7.57 (s, 1H), 7.33 (t,  $J = 7.8$  Hz, 1H), 7.26 (t,  $J = 7.8$  Hz, 1H), 4.83 (s, 2H), 1.66 (s, 9H).  $^{13}\text{C}$  NMR (101 MHz, CHLOROFORM-D)  $\delta$  149.8, 135.9, 129.3, 124.8, 123.9, 122.8, 120.6, 119.4, 115.4, 83.9, 57.3, 28.3. The spectroscopic data corresponds to the reported data.<sup>[8]</sup>

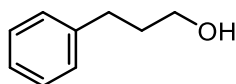

**3-Phenyl-1-propanol (2l):** colorless oil (25.9 mg, 95%). Eluent for the flash chromatography with silica gel: hexane / EA: 5/1.  $^1\text{H}$  NMR (400 MHz, CHLOROFORM-D)  $\delta$  7.32 – 7.26 (m, 2H), 7.21 – 7.17 (m, 3H), 3.67 (t,  $J = 6.4$  Hz, 2H), 2.71 (t,  $J = 7.6$  Hz, 2H), 1.89 (tt,  $J = 7.6, 6.4$  Hz, 2H), 1.40 (s, 1H).  $^{13}\text{C}$  NMR (101 MHz, CHLOROFORM-D)  $\delta$  142.0, 128.5, 128.5, 126.0, 62.4, 34.4, 32.2. The spectroscopic data corresponds to the reported data.<sup>[5]</sup>

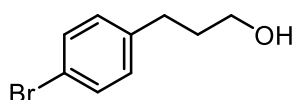

**3-(4-Bromophenyl)propan-1-ol (2m):** colorless oil (40.4 mg, 94%). Eluent for the flash chromatography with silica gel: hexane / EA: 2/1.  $^1\text{H}$  NMR (400 MHz, CHLOROFORM-D)  $\delta$  7.42 – 7.37 (m, 2H), 7.07 (d,  $J = 8.3$  Hz, 2H), 3.65 (t,  $J = 6.4$  Hz, 2H), 2.70 – 2.62 (m, 2H), 1.89 – 1.81 (m, 2H), 1.56 (s, 1H).  $^{13}\text{C}$  NMR (101 MHz, CHLOROFORM-D)  $\delta$  140.9, 131.6, 130.3, 119.7, 62.1, 34.1, 31.5. The spectroscopic data corresponds to the reported data.<sup>[9]</sup>

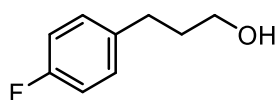

**3-(4-fluorophenyl)propan-1-ol (2n):** colorless oil (27.8 mg, 90%). Eluent for the flash chromatography with silica gel: hexane / EA: 2/1.  $^1\text{H}$  NMR (400 MHz, CHLOROFORM-*D*)  $\delta$  7.16 – 7.11 (m, 2H), 7.02 – 6.91 (m, 2H), 3.65 (t,  $J$  = 6.4 Hz, 2H), 2.72 – 2.63 (m, 2H), 1.90 – 1.81 (m, 2H), 1.75 (s, 1H).  $^{13}\text{C}$  NMR (101 MHz, CHLOROFORM-*D*)  $\delta$  161.3 (d,  $J$  = 243.4 Hz), 137.5 (d,  $J$  = 4.0 Hz), 129.8 (d,  $J$  = 8.1 Hz), 115.2 (d,  $J$  = 21.2 Hz), 62.09, 34.38, 31.29.  $^{19}\text{F}$  NMR (376 MHz, CHLOROFORM-*D*)  $\delta$  -117.5 – -117.7 (m). The spectroscopic data corresponds to the reported data.<sup>[10]</sup>

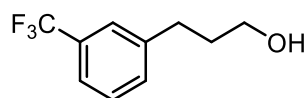

**3-[3-(trifluoromethyl)phenyl]propan-1-ol (2o):** colorless oil (32.7 mg, 80%). Eluent for the flash chromatography with silica gel: hexane / EA: 5/1.  $^1\text{H}$  NMR (400 MHz, CHLOROFORM-*D*)  $\delta$  7.46 – 7.44 (m, 2H), 7.42 – 7.38 (m, 2H), 3.68 (t,  $J$  = 6.4 Hz, 2H), 2.81 – 2.74 (m, 2H), 1.95 – 1.86 (m, 2H), 1.55 (s, 1H).  $^{13}\text{C}$  NMR (101 MHz, CHLOROFORM-*D*)  $\delta$  142.9, 132.0, 130.8 (q,  $J$  = 32.3 Hz), 128.9 (q,  $J$  = 8.1 Hz), 125.2 (q,  $J$  = 3.5 Hz), 124.4 (q,  $J$  = 273.7 Hz), 122.9 (q,  $J$  = 3.6 Hz), 62.0, 34.1, 32.0.  $^{19}\text{F}$  NMR (376 MHz, CHLOROFORM-*D*)  $\delta$  -62.4. The spectroscopic data corresponds to the reported data.<sup>[11]</sup>

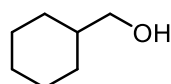

**Cyclohexylmethyl alcohol (2p):** colorless oil (17.8 mg, 78%). Eluent for the flash chromatography with silica gel: hexane / EA: 2/1.  $^1\text{H}$  NMR (400 MHz, CHLOROFORM-*D*)  $\delta$  3.44 (d,  $J$  = 6.4 Hz, 2H), 1.76 – 1.72 (m, 4H), 1.71 – 1.65 (m, 1H), 1.52 – 1.43 (m, 1H), 1.40 (s, 1H), 1.30 – 1.14 (m, 3H), 0.93 (qd,  $J$  = 12.8, 3.4 Hz, 2H).  $^{13}\text{C}$  NMR (101 MHz, CHLOROFORM-*D*)  $\delta$  68.9, 40.6, 29.7, 26.7, 26.0. The spectroscopic data corresponds to the reported data.<sup>[12]</sup>

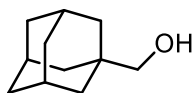

**1-Adamantanemethanol (2q):** white solid (32.9 mg, 99%). Eluent for the flash chromatography with silica gel: hexane / EA: 5/1.  $^1\text{H}$  NMR (400 MHz, CHLOROFORM-D)  $\delta$  3.19 (s, 2H), 1.99 (s, 3H), 1.73 (d,  $J$  = 12.4 Hz, 3H), 1.65 (d,  $J$  = 11.5 Hz, 3H), 1.51 (d,  $J$  = 2.8 Hz, 7H).  $^{13}\text{C}$  NMR (101 MHz, CHLOROFORM-D)  $\delta$  73.9, 39.1, 37.3, 34.6, 28.3. The spectroscopic data corresponds to the reported data.<sup>[6]</sup>

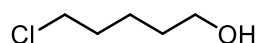

**5-Chloro-1-pentanol (2r):** colorless oil (22.8 mg, 93%). Eluent for the flash chromatography with silica gel: hexane / EA: 2/1.  $^1\text{H}$  NMR (400 MHz, CHLOROFORM-D)  $\delta$  3.66 (t,  $J$  = 6.2 Hz, 2H), 3.55 (t,  $J$  = 6.6 Hz, 2H), 1.82 (dt,  $J$  = 14.2, 6.9 Hz, 2H), 1.64 – 1.48 (m, 5H).  $^{13}\text{C}$  NMR (101 MHz, CHLOROFORM-D)  $\delta$  62.7, 45.1, 32.4, 32.0, 23.2. The spectroscopic data corresponds to the reported data.<sup>[13]</sup>

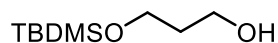

**3-(*t*-Butyldimethylsilyloxy)propanol (2t):** colorless oil (37.3 mg, 98%). Eluent for the flash chromatography with silica gel: hexane / EA: 2/1.  $^1\text{H}$  NMR (400 MHz, CHLOROFORM-D)  $\delta$  3.84 (t,  $J$  = 5.7 Hz, 2H), 3.80 (t,  $J$  = 5.3 Hz, 2H), 2.76 (s, 1H), 1.78 (tt,  $J$  = 5.7, 5.3 Hz, 2H), 0.90 (s, 9H), 0.08 (s, 6H).  $^{13}\text{C}$  NMR (101 MHz, CHLOROFORM-D)  $\delta$  63.0, 62.5, 34.3, 26.0, 18.3, -5.4. The spectroscopic data corresponds to the reported data.<sup>[14]</sup>

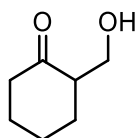

**2-(Hydroxymethyl)cyclohexanone (2t):** Colorless oil (21.0 mg, 82%). Eluent for the flash chromatography with silica gel: hexane / EA: 2/1.  $^1\text{H}$  NMR (400 MHz, CHLOROFORM-D)  $\delta$  3.80 – 3.69 (m, 1H), 3.67 – 3.55 (m, 1H), 2.70 (s, 1H), 2.52 (ddt,  $J$  = 11.9, 6.4, 4.6 Hz, 1H), 2.46 – 2.24 (m, 2H), 2.15 – 1.99 (m, 2H), 1.97 – 1.88 (m,

1H), 1.76 – 1.60 (m, 2H), 1.48 (qd,  $J = 12.8, 3.7$  Hz, 1H).  $^{13}\text{C}$  NMR (101 MHz, CHLOROFORM-D)  $\delta$  215.0, 62.9, 52.4, 42.3, 30.2, 27.6, 24.8. The spectroscopic data corresponds to the reported data.<sup>[15]</sup>

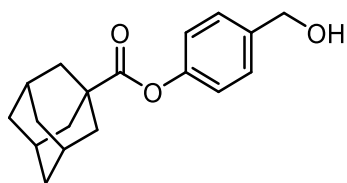

**4-(Hydroxymethyl)phenyl adamantane-1-carboxylate (2u):** white solid (55.6 mg, 97%). Eluent for the flash chromatography with silica gel: hexane / EA: 2/1.  $^1\text{H}$  NMR (400 MHz, CHLOROFORM-D)  $\delta$  7.33 (d,  $J = 8.7$  Hz, 2H), 7.01 (d,  $J = 8.3$  Hz, 2H), 4.63 (s, 2H), 2.20 – 2.05 (m, 10H), 1.80 – 1.73 (m, 6H).  $^{13}\text{C}$  NMR (101 MHz, CHLOROFORM-D)  $\delta$  176.5, 150.6, 138.3, 128.1, 121.7, 64.8, 41.1, 38.8, 36.5, 28.0. The spectroscopic data corresponds to the reported data.<sup>[16]</sup>

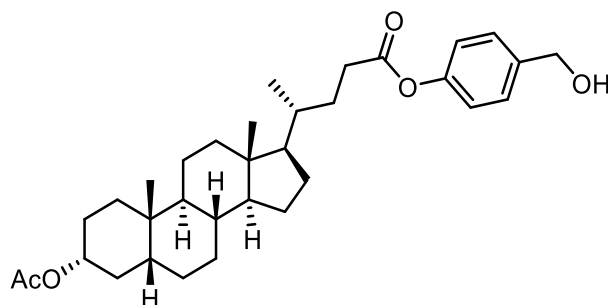

**4-(Hydroxymethyl)phenyl (R)-4-(((3R,5R,8R,9S,10S,13R,14S,17R)-3-acetoxy-10,13-dimethylhexadecahydro-1H-cyclopenta[a]phenanthren-17-yl)pentanoate (2v):** white solid (73.5mg, 70%). Melting point: 138.4 – 140.9 °C. Eluent for the flash chromatography with silica gel: hexane / EA: 2/1.  $^1\text{H}$  NMR (400 MHz, CHLOROFORM-D)  $\delta$  7.35 (d,  $J = 8.3$  Hz, 2H), 7.04 (d,  $J = 8.3$  Hz, 2H), 4.71 (td,  $J = 11.5, 5.7$  Hz, 1H), 4.64 (s, 2H), 2.60 (ddd,  $J = 15.1, 9.6, 4.8$  Hz, 1H), 2.51 – 2.43 (m, 1H), 2.02 (s, 3H), 2.00 – 1.74 (m, 6H), 1.68 (d,  $J = 10.1$  Hz, 1H), 1.61 – 1.37 (m, 10H), 1.35 – 1.02 (m, 10H), 0.98 (d,  $J = 6.4$  Hz, 3H), 0.93 (s, 3H), 0.67 (s, 3H).  $^{13}\text{C}$  NMR (101 MHz, CHLOROFORM-D)  $\delta$  173.0, 170.8, 150.1, 138.6, 128.1, 121.7, 74.5, 64.6, 56.6, 56.0, 42.8, 41.9, 40.5, 40.2, 35.8, 35.4, 35.1, 34.6, 32.3, 31.4, 31.0, 28.3, 27.1,

26.7, 26.4, 24.2, 23.4, 21.6, 20.9, 18.4, 12.1. HRMS (EI+) calculated  $m/z$  for  $C_{33}H_{48}O_5^+$   $[M]^+$ : 524.3496, found 524.3498.

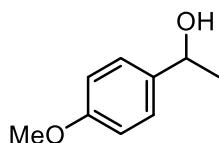

**1-(4-Methoxyphenyl)ethanol (2w):** colorless oil (30.1 mg, 99%). Eluent for the flash chromatography with silica gel: hexane / EA: 5/1.  $^1H$  NMR (400 MHz, CHLOROFORM-D)  $\delta$  7.31 – 7.26 (m, 2H), 6.90 – 6.84 (m, 2H), 4.83 (q,  $J$  = 6.4 Hz, 1H), 3.79 (s, 3H), 1.97 (s, 1H), 1.46 (d,  $J$  = 6.4 Hz, 3H).  $^{13}C$  NMR (101 MHz, CHLOROFORM-D)  $\delta$  159.1, 138.2, 126.8, 114.0, 70.0, 55.4, 25.1. The spectroscopic data corresponds to the reported data.<sup>[5]</sup>

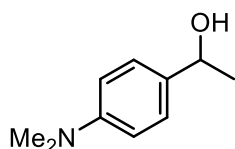

**1-[4-(N,N-dimethylamino)phenyl]ethanol (2x):** colorless oil (26.8 mg, 81%). Eluent for the flash chromatography with silica gel: hexane / EA: 2/1.  $^1H$  NMR (400 MHz, CHLOROFORM-D)  $\delta$  7.25 (d,  $J$  = 8.7 Hz, 2H), 6.72 (d,  $J$  = 8.7 Hz, 2H), 4.81 (q,  $J$  = 6.4 Hz, 1H), 2.93 (s, 6H), 1.79 (s, 1H), 1.47 (d,  $J$  = 6.4 Hz, 3H).  $^{13}C$  NMR (101 MHz, CHLOROFORM-D)  $\delta$  150.3, 133.9, 126.6, 112.7, 70.2, 40.8, 24.8. The spectroscopic data corresponds to the reported data.<sup>[17]</sup>

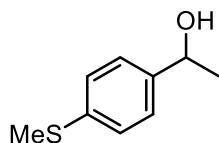

**1-(4-(Methylthio)phenyl)ethanol (2y):** white solid (33.3 mg, 99%). Eluent for the flash chromatography with silica gel: hexane / EA: 2/1.  $^1H$  NMR (400 MHz, CHLOROFORM-D)  $\delta$  7.27 (d,  $J$  = 8.3 Hz, 2H), 7.23 (d,  $J$  = 8.3 Hz, 2H), 4.83 (q,  $J$  = 6.4 Hz, 1H), 2.47 (s, 3H), 2.08 (s, 1H), 1.46 (d,  $J$  = 6.4 Hz, 3H).  $^{13}C$  NMR (101 MHz, CHLOROFORM-D)  $\delta$  142.9, 137.4, 126.9, 126.1, 70.1, 25.2, 16.1. The spectroscopic data corresponds to the reported data.<sup>[18]</sup>



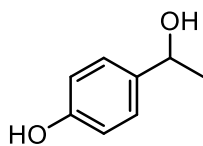

**1-(4-Hydroxyphenyl)ethanol (2z):** white solid (27.1 mg, 98%). Eluent for the flash chromatography with silica gel: hexane / EA: 2/1.  $^1\text{H}$  NMR (400 MHz, METHANOL- $D_4$ )  $\delta$  7.23 – 7.13 (m, 2H), 6.76 – 6.72 (m, 2H), 4.77 – 4.70 (m, 1H), 1.43 – 1.39 (m, 3H).  $^{13}\text{C}$  NMR (101 MHz, METHANOL- $D_4$ )  $\delta$  157.6, 138.3, 127.8, 115.9, 70.6, 25.4. The spectroscopic data corresponds to the reported data.<sup>[19]</sup>

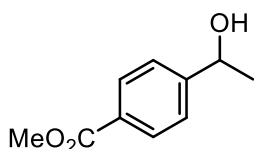

**Methyl 4-(1-hydroxy ethyl)benzoate (2aa):** colorless oil (22.3 mg, 62%). Eluent for the flash chromatography with silica gel: hexane / EA: 2/1.  $^1\text{H}$  NMR (400 MHz, CHLOROFORM- $D$ )  $\delta$  8.03 – 7.97 (m, 2H), 7.43 (d,  $J$  = 8.3 Hz, 2H), 4.95 (q,  $J$  = 6.4 Hz, 1H), 3.90 (s, 3H), 2.16 (s, 1H), 1.50 (d,  $J$  = 6.9 Hz, 3H).  $^{13}\text{C}$  NMR (101 MHz, CHLOROFORM- $D$ )  $\delta$  167.1, 151.1, 130.0, 129.3, 125.4, 70.1, 52.2, 25.4. The spectroscopic data corresponds to the reported data.<sup>[20]</sup>

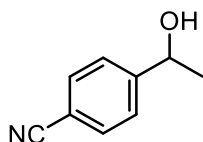

**4-(1-Hydroxyethyl)benzonitrile (2ab):** colorless oil (15.6 mg, 53%). Eluent for the flash chromatography with silica gel: hexane / EA: 2/1.  $^1\text{H}$  NMR (400 MHz, CHLOROFORM- $D$ )  $\delta$  7.63 (d,  $J$  = 8.3 Hz, 2H), 7.49 (d,  $J$  = 8.3 Hz, 2H), 4.96 (q,  $J$  = 6.4 Hz, 1H), 2.07 (s, 1H), 1.50 (d,  $J$  = 6.9 Hz, 3H).  $^{13}\text{C}$  NMR (101 MHz, CHLOROFORM- $D$ )  $\delta$  151.2, 132.5, 126.2, 119.0, 111.2, 69.8, 25.5. The spectroscopic data corresponds to the reported data.<sup>[18]</sup>

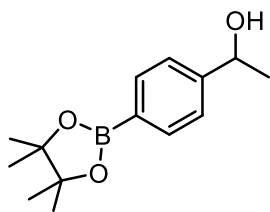

**1-(4-(4,4,5,5-Tetramethyl-1,3,2-dioxaborolan-2-yl)phenyl)ethanol (2ac):** white solid (25.3 mg, 51%). Eluent for the flash chromatography with silica gel: hexane / EA: 2/1.  $^1\text{H}$  NMR (400 MHz, CHLOROFORM-D)  $\delta$  7.80 (d,  $J$  = 8.3 Hz, 2H), 7.38 (d,  $J$  = 7.8 Hz, 2H), 4.91 (q,  $J$  = 6.4 Hz, 1H), 1.93 (s, 1H), 1.49 (d,  $J$  = 6.4 Hz, 3H), 1.34 (s, 12H).  $^{13}\text{C}$  NMR (101 MHz, CHLOROFORM-D)  $\delta$  149.1, 135.2, 124.8, 83.9, 70.5, 25.3, 25.0. The spectroscopic data corresponds to the reported data.<sup>[21]</sup>

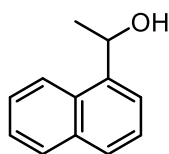

**1-(1-Naphthyl)ethanol (2ad):** colorless oil (11.4 mg, 33%). Eluent for the flash chromatography with silica gel: hexane / EA: 2/1.  $^1\text{H}$  NMR (400 MHz, CHLOROFORM-D)  $\delta$  8.12 (d,  $J$  = 8.3 Hz, 1H), 7.90 – 7.85 (m, 1H), 7.78 (d,  $J$  = 8.3 Hz, 1H), 7.68 (d,  $J$  = 7.3 Hz, 1H), 7.55 – 7.45 (m, 3H), 5.68 (q,  $J$  = 6.4 Hz, 1H), 1.97 (s, 1H), 1.67 (d,  $J$  = 6.4 Hz, 3H).  $^{13}\text{C}$  NMR (101 MHz, CHLOROFORM-D)  $\delta$  141.5, 133.9, 130.4, 129.5, 129.0, 128.0, 126.2, 125.7, 123.3, 122.1, 67.2, 24.5. The spectroscopic data corresponds to the reported data.<sup>[22]</sup>

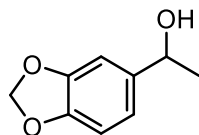

**1-Benzo[1,3]dioxol-5-yl-ethanol (2ae):** colorless oil (31.6 mg, 95%). Eluent for the flash chromatography with silica gel: hexane / EA: 2/1.  $^1\text{H}$  NMR (400 MHz, CHLOROFORM-D)  $\delta$  6.86 (s, 1H), 6.81 – 6.73 (m, 2H), 5.92 (s, 2H), 4.78 (q,  $J$  = 6.4 Hz, 1H), 2.20 (s, 1H), 1.43 (d,  $J$  = 6.4 Hz, 3H).  $^{13}\text{C}$  NMR (101 MHz, CHLOROFORM-

D)  $\delta$  147.8, 146.8, 140.1, 118.8, 108.1, 106.1, 101.0, 70.2, 25.2. The spectroscopic data corresponds to the reported data.<sup>[23]</sup>

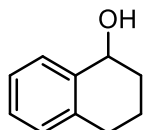

**1,2,3,4-Tetrahydro-1-naphthol (2af):** colorless oil (24.3 mg, 82%). Eluent for the flash chromatography with silica gel: hexane / EA: 5/1. <sup>1</sup>H NMR (400 MHz, CHLOROFORM-D)  $\delta$  7.43 – 7.39 (m, 1H), 7.21 – 7.18 (m, 2H), 7.11 – 7.08 (m, 1H), 4.75 (s, 1H), 2.81 (dt,  $J$  = 16.0, 5.0 Hz, 1H), 2.75 – 2.67 (m, 1H), 2.00 – 1.86 (m, 4H), 1.81 – 1.73 (m, 1H). <sup>13</sup>C NMR (101 MHz, CHLOROFORM-D)  $\delta$  138.9, 137.2, 129.1, 128.8, 127.7, 126.3, 68.2, 32.3, 29.3, 18.9. The spectroscopic data corresponds to the reported data.<sup>[18]</sup>

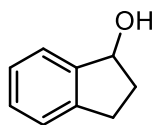

**1-Indanol (2ag):** colorless oil (24.7 mg, 92%). Eluent for the flash chromatography with silica gel: hexane / EA: 2/1. <sup>1</sup>H NMR (400 MHz, CHLOROFORM-D)  $\delta$  7.40 (d,  $J$  = 6.0 Hz, 1H), 7.24 – 7.20 (m, 3H), 5.21 (t,  $J$  = 5.5 Hz, 1H), 3.04 (ddd,  $J$  = 16.0, 8.7, 4.8 Hz, 1H), 2.80 (dt,  $J$  = 15.6, 7.3 Hz, 1H), 2.46 (dtd,  $J$  = 13.3, 7.6, 5.0 Hz, 1H), 2.01 (s, 1H), 1.97 – 1.86 (m, 1H). <sup>13</sup>C NMR (101 MHz, CHLOROFORM-D)  $\delta$  145.1, 143.4, 128.4, 126.8, 125.0, 124.3, 76.5, 36.0, 29.9. The spectroscopic data corresponds to the reported data.<sup>[18]</sup>

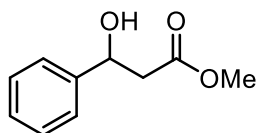

**Methyl 3-hydroxy-3-phenylpropionate (2ah):** colorless oil (31.0 mg, 86%). Eluent for the flash chromatography with silica gel: hexane / EA: 2/1. <sup>1</sup>H NMR (400 MHz, CHLOROFORM-D)  $\delta$  7.37 – 7.25 (m, 5H), 5.14 – 5.10 (m, 1H), 3.70 (s, 3H), 3.32 (s,

1H), 2.79 – 2.67 (m, 2H). <sup>13</sup>C NMR (101 MHz, CHLOROFORM-D) δ 172.9, 142.6, 128.6, 127.9, 125.7, 70.4, 52.0, 43.3. The spectroscopic data corresponds to the reported data.<sup>[24]</sup>

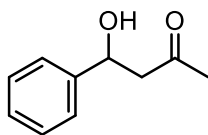

**1-Hydroxy-1-phenyl-3-butanone (2ai):** colorless oil (23.0 mg, 70%). Eluent for the flash chromatography with silica gel: hexane / EA: 2/1. <sup>1</sup>H NMR (400 MHz, CHLOROFORM-D) δ 7.35 (d, *J* = 4.6 Hz, 4H), 7.30 – 7.25 (m, 1H), 5.14 (dd, *J* = 8.9, 3.0 Hz, 1H), 3.35 (s, 1H), 2.88 (dd, *J* = 17.4, 9.2 Hz, 1H), 2.80 (dd, *J* = 17.4, 3.2 Hz, 1H), 2.18 (s, 3H). <sup>13</sup>C NMR (101 MHz, CHLOROFORM-D) δ 209.2, 142.8, 128.6, 127.8, 125.7, 69.9, 52.1, 30.9. The spectroscopic data corresponds to the reported data.<sup>[25]</sup>

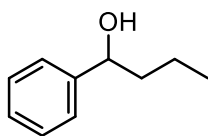

**1-Phenyl-1-butanol (2aj):** colorless oil (29.4 mg, 98%). Eluent for the flash chromatography with silica gel: hexane / EA: 10/1. <sup>1</sup>H NMR (400 MHz, CHLOROFORM-D) δ 7.35 – 7.31 (m, 4H), 7.28 – 7.24 (m, 1H), 4.64 (t, *J* = 6.6 Hz, 1H), 2.02 (s, 1H), 1.77 (dtd, *J* = 10.1, 7.8, 5.0 Hz, 1H), 1.66 (ddt, *J* = 13.3, 10.1, 5.5 Hz, 1H), 1.48 – 1.36 (m, 1H), 1.34 – 1.24 (m, 1H), 0.92 (t, *J* = 7.3 Hz, 3H). <sup>13</sup>C NMR (101 MHz, CHLOROFORM-D) δ 145.0, 128.5, 127.6, 126.0, 74.5, 41.3, 19.1, 14.1. The spectroscopic data corresponds to the reported data.<sup>[26]</sup>

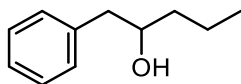

**1-Phenyl-2-pentanol (2ak):** colorless oil (15.8 mg, 48%). Eluent for the flash chromatography with silica gel: hexane / EA: 5/1. <sup>1</sup>H NMR (400 MHz, CHLOROFORM-D) δ 7.34 – 7.29 (m, 2H), 7.26 – 7.20 (m, 3H), 3.91 – 3.75 (m, 1H),

2.83 (dd,  $J = 13.5, 4.4$  Hz, 1H), 2.64 (dd,  $J = 13.5, 8.5$  Hz, 1H), 1.54 – 1.47 (m, 4H), 1.41 – 1.37 (m, 1H), 0.94 (t,  $J = 7.1$  Hz, 3H).  $^{13}\text{C}$  NMR (101 MHz, CHLOROFORM-D)  $\delta$  138.8, 129.6, 128.7, 126.6, 72.6, 44.2, 39.1, 19.1, 14.2. The spectroscopic data corresponds to the reported data.<sup>[27]</sup>

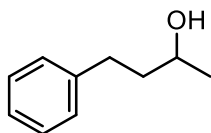

**1-Phenyl-3-butanol (2al):** colorless oil (15.0 mg, 50%). Eluent for the flash chromatography with silica gel: hexane / EA: 5/1.  $^1\text{H}$  NMR (400 MHz, CHLOROFORM-D)  $\delta$  7.31 – 7.25 (m, 2H), 7.21 – 7.16 (m, 3H), 3.86 – 3.78 (m, 1H), 2.80 – 2.62 (m, 2H), 1.77 (ddt,  $J = 9.2, 7.3, 5.3$  Hz, 2H), 1.53 (s, 1H), 1.22 (d,  $J = 6.0$  Hz, 3H).  $^{13}\text{C}$  NMR (101 MHz, CHLOROFORM-D)  $\delta$  142.2, 128.5, 128.5, 125.9, 67.6, 41.0, 32.2, 23.7. The spectroscopic data corresponds to the reported data.<sup>[18]</sup>

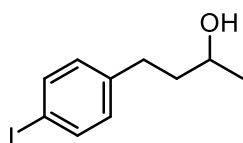

**4-(4-Iodophenyl)-2-butanol (2am):** colorless oil (11.6 mg, 21%). Eluent for the flash chromatography with silica gel: hexane / EA: 5/1.  $^1\text{H}$  NMR (400 MHz, CHLOROFORM-D)  $\delta$  7.64 – 7.54 (m, 2H), 7.03 – 6.88 (m, 2H), 3.81 (dq,  $J = 12.4, 6.0$  Hz, 1H), 2.75 – 2.57 (m, 2H), 1.77 – 1.68 (m, 2H), 1.22 (d,  $J = 6.4$  Hz, 3H).  $^{13}\text{C}$  NMR (101 MHz, CHLOROFORM-D)  $\delta$  141.8, 137.6, 130.7, 90.9, 67.4, 40.7, 31.7, 23.9. HRMS (EI+) calculated  $m/z$  for  $\text{C}_{10}\text{H}_{13}\text{IO}^+$   $[\text{M}]^+$ : 276.0006, found 276.0009.

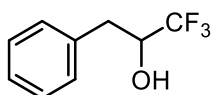

**1,1,1-Trifluoro-3-phenylpropan-2-ol (2an):** colorless oil (34.6 mg, 91%). Eluent for the flash chromatography with silica gel: hexane / EA: 10/1.  $^1\text{H}$  NMR (400 MHz, CHLOROFORM-D)  $\delta$  7.36 – 7.24 (m, 5H), 4.18 – 4.08 (m, 1H), 3.05 (dd,  $J = 14.2, 2.8$  Hz, 1H), 2.84 (dd,  $J = 14.2, 10.1$  Hz, 1H), 2.15 (d,  $J = 5.0$  Hz, 1H).  $^{13}\text{C}$  NMR (101 MHz,

CHLOROFORM-D)  $\delta$  135.8, 129.6, 128.9, 127.4, 125.0 (q,  $J$  = 282.8 Hz), 71.6 (q,  $J$  = 31.3 Hz), 36.2. The spectroscopic data corresponds to the reported data.<sup>[28]</sup>

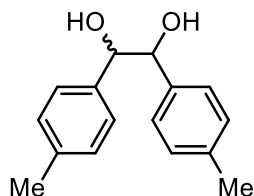

**1,2-Bis(4-methylphenyl)-1,2-ethanediol (*dl* and *meso*) (3a):** White solid. Eluent for the flash chromatography with silica gel: hexane / EA: 2/1.  $^1\text{H}$  NMR (400 MHz, CHLOROFORM-D)  $\delta$  7.25 – 7.13 (m, 8H), 7.06 – 6.99 (m, 8H), 4.72 (s, 2H), 4.64 (s, 2H), 2.86 (s, 2H), 2.34 (s, 6H), 2.29 (s, 6H), 2.16 (s, 2H).  $^{13}\text{C}$  NMR (101 MHz, CHLOROFORM-D)  $\delta$  137.9, 137.6, 137.1, 129.1, 128.9, 127.2, 127.0, 78.9, 78.2, 21.3, 21.3. The spectroscopic data corresponds to the reported data.<sup>[29]</sup>

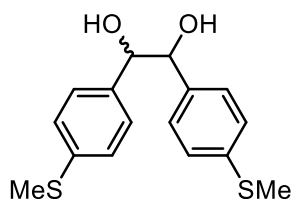

**1,2-Bis(4-(methylthio)phenyl)-1,2-ethanediol (*dl* and *meso*) (3b):** White solid. Eluent for the flash chromatography with silica gel: hexane / EA: 2/1.  $^1\text{H}$  NMR (400 MHz, CHLOROFORM-D)  $\delta$  7.11 (d,  $J$  = 8.3 Hz, 4H), 7.03 (d,  $J$  = 8.7 Hz, 4H), 4.62 (s, 2H), 2.89 (s, 2H), 2.45 (s, 6H).  $^{13}\text{C}$  NMR (101 MHz, CHLOROFORM-D)  $\delta$  138.3, 136.6, 127.6, 126.2, 78.8, 15.8. (*R,S*)-**287a** was assigned, while (*R,R*)/(*S,S*)-**287a** was not assigned due to the weak signal caused by extremely low solubility. The spectroscopic data corresponds to the reported data.<sup>[30]</sup>

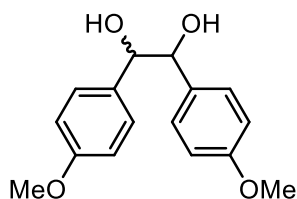

**1,2-Bis(4-methoxyphenyl)-1,2-ethanediol (*dl* and *meso*) (3c):** White solid. Eluent for the flash chromatography with silica gel: hexane / EA: 2/1.  $^1\text{H}$  NMR (400 MHz,

CHLOROFORM-D)  $\delta$  7.18 (d,  $J$  = 8.7 Hz, 1H), 7.02 (d,  $J$  = 8.7 Hz, 4H), 6.84 (d,  $J$  = 8.7 Hz, 1H), 6.75 (d,  $J$  = 8.7 Hz, 4H), 4.72 (s, 2H), 4.60 (s, 2H), 3.79 (s, 6H), 3.75 (s, 6H), 2.94 (s, 2H).  $^{13}\text{C}$  NMR (101 MHz, CHLOROFORM-D)  $\delta$  159.5, 159.3, 132.2, 132.2, 128.5, 128.3, 113.8, 113.6, 78.9, 77.9, 55.4, 55.3. The spectroscopic data corresponds to the reported data.<sup>[31]</sup>

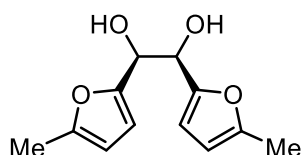

**(*R,S*)-1,2-bis(5-methylfuran-2-yl)-1,2-ethanediol (*dl*-3d):** Colorless oil. Eluent for the flash chromatography with silica gel: hexane / EA: 2/1.  $^1\text{H}$  NMR (400 MHz, CHLOROFORM-D)  $\delta$  6.21 (d,  $J$  = 3.2 Hz, 2H), 5.93 (d,  $J$  = 2.8 Hz, 2H), 4.91 (s, 2H), 2.32 (s, 2H), 2.29 (s, 6H).  $^{13}\text{C}$  NMR (101 MHz, CHLOROFORM-D)  $\delta$  152.6, 151.0, 109.7, 106.5, 70.0, 13.7. The spectroscopic data corresponds to the reported data.<sup>[30]</sup>

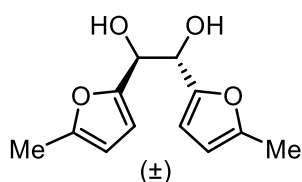

**(*R,R*)/(*S,S*)-1,2-bis(5-methylfuran-2-yl)-1,2-ethanediol (*meso*-3d):** Colorless oil. Eluent for the flash chromatography with silica gel: hexane / EA: 2/1.  $^1\text{H}$  NMR (400 MHz, CHLOROFORM-D)  $\delta$  6.13 (d,  $J$  = 2.8 Hz, 2H), 5.87 (d,  $J$  = 2.8 Hz, 2H), 4.92 (s, 2H), 2.81 (s, 2H), 2.26 (s, 6H).  $^{13}\text{C}$  NMR (101 MHz, CHLOROFORM-D)  $\delta$  152.3, 150.9, 109.0, 106.4, 69.9, 13.7. The spectroscopic data corresponds to the reported data.<sup>[30]</sup>

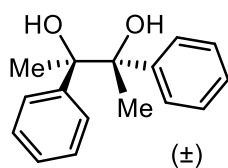

**(*R,R*)/(*S,S*)-2,3-diphenylbutane-2,3-diol (*dl*-3e):** White solid. Eluent for the flash chromatography with silica gel: hexane / EA: 5/1.  $^1\text{H}$  NMR (400 MHz, CHLOROFORM-*D*)  $\delta$  7.25 – 7.23 (m, 6H), 7.21 – 7.18 (m, 4H), 2.59 (s, 2H), 1.50 (s, 6H).  $^{13}\text{C}$  NMR (101 MHz, CHLOROFORM-*D*)  $\delta$  143.6, 127.5, 127.3, 127.2, 79.0, 25.1. The spectroscopic data corresponds to the reported data.<sup>[29]</sup>

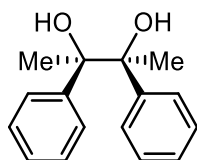

**(*R,S*)-2,3-diphenylbutane-2,3-diol (*meso*-3e):** White solid. Eluent for the flash chromatography with silica gel: hexane / EA: 5/1.  $^1\text{H}$  NMR (400 MHz, CHLOROFORM-*D*)  $\delta$  7.25 – 7.21 (m, 10H), 2.25 (s, 2H), 1.58 (s, 6H).  $^{13}\text{C}$  NMR (101 MHz, CHLOROFORM-*D*)  $\delta$  143.9, 127.4, 127.0, 127.0, 78.7, 25.3. The spectroscopic data corresponds to the reported data.<sup>[29]</sup>

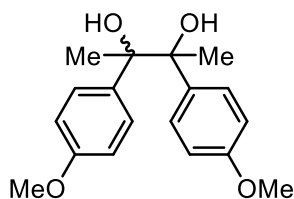

**1,2-Bis(4-methoxyphenyl)butane-2,3-ethanediol (*dl* and *meso*) (3f):** White solid. Eluent for the flash chromatography with silica gel: hexane / EA: 2/1.  $^1\text{H}$  NMR (400 MHz, CHLOROFORM-*D*)  $\delta$  7.14 – 7.07 (m, 8H), 6.79 – 6.73 (m, 8H), 3.79 (s, 6H), 3.78 (s, 6H), 2.56 (s, 2H), 2.28 (s, 2H), 1.54 (s, 6H), 1.45 (s, 6H).  $^{13}\text{C}$  NMR (101 MHz, CHLOROFORM-*D*)  $\delta$  158.7, 158.6, 136.2, 135.8, 128.7, 128.2, 112.7, 112.5, 78.8, 78.6, 55.3, 55.3, 25.3, 25.1. The spectroscopic data corresponds to the reported data.<sup>[32]</sup>

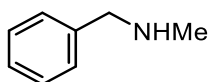

***N*-Methylbenzylamine (4a):** white solid (10.2 mg, 42%). Eluent for the flash chromatography with silica gel: CH<sub>2</sub>Cl<sub>2</sub> / MeOH: 20/1.  $^1\text{H}$  NMR (400 MHz, CHLOROFORM-*D*)  $\delta$  7.35 – 7.29 (m, 4H), 7.27 – 7.22 (m, 1H), 3.74 (s, 2H), 2.45 (s,



3H), 1.41 (s, 1H).  $^{13}\text{C}$  NMR (101 MHz, CHLOROFORM-D)  $\delta$  140.3, 128.5, 128.3, 127.0, 56.2, 36.2. The spectroscopic data corresponds to the reported data.<sup>[33]</sup>

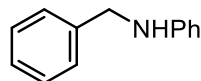

**N-Benzylaniline (4b):** white solid (33.7 mg, 92%). Eluent for the flash chromatography with silica gel: hexane / EA: 10/1.  $^1\text{H}$  NMR (400 MHz, CHLOROFORM-D)  $\delta$  7.34 (q,  $J$  = 8.0 Hz, 4H), 7.26 (t,  $J$  = 6.6 Hz, 1H), 7.16 (t,  $J$  = 7.6 Hz, 2H), 6.74 – 6.68 (m, 1H), 6.62 (d,  $J$  = 8.3 Hz, 2H), 4.31 (s, 2H), 4.00 (s, 1H).  $^{13}\text{C}$  NMR (101 MHz, CHLOROFORM-D)  $\delta$  148.2, 139.6, 129.4, 128.8, 127.6, 127.3, 117.7, 112.9, 48.4. The spectroscopic data corresponds to the reported data.<sup>[34]</sup>

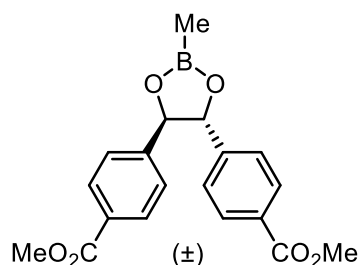

**(*R,R*)/(*S,S*) dimethyl 4,4'-(2-methyl-1,3,2-dioxaborolane-4,5-diyl)dibenzoate (*dl*-5a):** White solid. Melting point: 109.6 – 111.5 °C. Eluent for the flash chromatography with silica gel: hexane / EA: 2/1.  $^1\text{H}$  NMR (400 MHz, CHLOROFORM-D)  $\delta$  8.07 (d,  $J$  = 8.3 Hz, 4H), 7.35 (d,  $J$  = 8.3 Hz, 4H), 5.15 (s, 2H), 3.93 (s, 6H), 0.57 (s, 3H).  $^{13}\text{C}$  NMR (101 MHz, CHLOROFORM-D)  $\delta$  166.8, 144.9, 130.4, 130.3, 125.8, 85.9, 52.4. HRMS (EI+) calculated  $m/z$  for  $\text{C}_{19}\text{H}_{19}\text{BO}_6^+$   $[\text{M}]^+$ : 354.1269, found 354.1267.

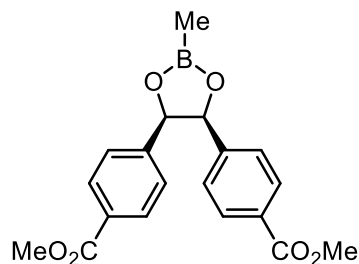

**(*R,S*) dimethyl 4,4'-(2-methyl-1,3,2-dioxaborolane-4,5-diyl)dibenzoate (*meso*-5a):** White solid. Melting point: 223.9 – 225.2 °C. Eluent for the flash chromatography with

silica gel: hexane / EA: 2/1.  $^1\text{H}$  NMR (400 MHz, CHLOROFORM-D)  $\delta$  7.74 (d,  $J$  = 8.3 Hz, 4H), 6.98 (d,  $J$  = 8.3 Hz, 4H), 5.80 (s, 2H), 3.84 (s, 6H), 0.63 (s, 3H).  $^{13}\text{C}$  NMR (101 MHz, CHLOROFORM-D)  $\delta$  166.7, 142.4, 129.5, 129.3, 126.3, 82.4, 52.2. HRMS (EI+) calculated  $m/z$  for  $\text{C}_{19}\text{H}_{19}\text{BO}_6^+$   $[\text{M}]^+$ : 354.1269, found 354.1267.

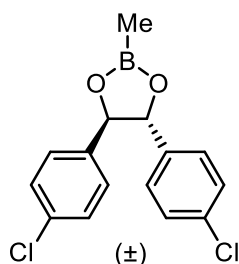

**(*R,R*)/(*S,S*)-4,5-bis(4-chlorophenyl)-2-methyl-1,3,2-dioxaborolane (*dl*-5b):** Light yellow oil. Eluent for the flash chromatography with silica gel: hexane / EA: 15/1.  $^1\text{H}$  NMR (400 MHz, CHLOROFORM-D)  $\delta$  7.36 (d,  $J$  = 8.3 Hz, 4H), 7.20 (d,  $J$  = 8.3 Hz, 4H), 5.05 (s, 2H), 0.53 (s, 3H).  $^{13}\text{C}$  NMR (101 MHz, CHLOROFORM-D)  $\delta$  138.5, 134.5, 129.2, 127.3, 85.8. HRMS (EI+) calculated  $m/z$  for  $\text{C}_{15}\text{H}_{13}\text{BCl}_2\text{O}_2^+$   $[\text{M}]^+$ : 306.0380, found 306.0377.

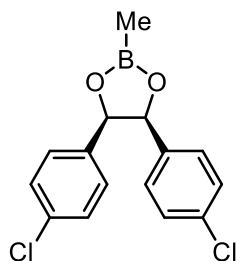

**(*R,S*)-4,5-bis(4-chlorophenyl)-2-methyl-1,3,2-dioxaborolane (*meso*-5b):** White solid. Melting point: 89.1 – 91.4 °C. Eluent for the flash chromatography with silica gel: hexane / EA: 2/1.  $^1\text{H}$  NMR (400 MHz, CHLOROFORM-D)  $\delta$  7.10 – 7.06 (m, 4H), 6.85 – 6.80 (m, 4H), 5.68 (s, 2H), 0.59 (s, 3H).  $^{13}\text{C}$  NMR (101 MHz, CHLOROFORM-D)  $\delta$  128.5, 128.5, 128.2, 127.7, 82.1. HRMS (EI+) calculated  $m/z$  for  $\text{C}_{15}\text{H}_{13}\text{BCl}_2\text{O}_2^+$   $[\text{M}]^+$ : 306.0380, found 306.0377.

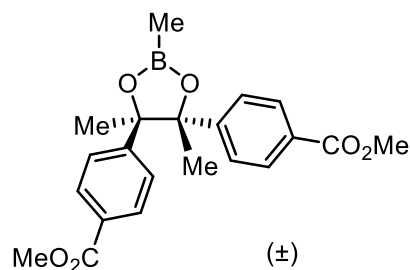

**(*R,R*)/(*S,S*) dimethyl 4,4'-(2,4,5-trimethyl-1,3,2-dioxaborolane-4,5-diyl)dibenzoate**

**(*dl*-5c):** White solid. Melting point: 152.0 – 153.9 °C. Eluent for the flash chromatography with silica gel: hexane / EA: 10/1.  $^1\text{H}$  NMR (400 MHz,  $\text{CHLOROFORM-D}$ )  $\delta$  8.08 (d,  $J$  = 8.7 Hz, 4H), 7.53 (d,  $J$  = 8.3 Hz, 4H), 3.95 (s, 6H), 1.15 (s, 6H), 0.55 (s, 3H).  $^{13}\text{C}$  NMR (101 MHz,  $\text{CHLOROFORM-D}$ )  $\delta$  166.9, 147.5, 129.6, 125.8, 87.8, 52.3, 27.5. HRMS (EI+) calculated  $m/z$  for  $\text{C}_{21}\text{H}_{23}\text{BO}_6^+$  [ $\text{M}$ ] $^+$ : 382.1582, found 382.1585.

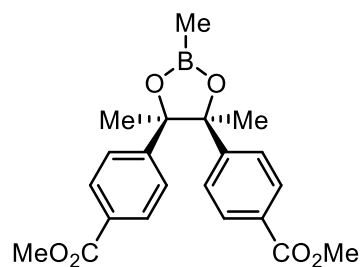

**(*R,S*) dimethyl 4,4'-(2,4,5-trimethyl-1,3,2-dioxaborolane-4,5-diyl)dibenzoate**

**(*meso*-5c):** White solid. Melting point: 103.2 – 105.4 °C. Eluent for the flash chromatography with silica gel: hexane / EA: 5/1.  $^1\text{H}$  NMR (400 MHz,  $\text{CHLOROFORM-D}$ )  $\delta$  7.68 (d,  $J$  = 8.3 Hz, 4H), 6.99 (d,  $J$  = 8.3 Hz, 4H), 3.85 (s, 6H), 1.83 (s, 6H), 0.64 (s, 3H).  $^{13}\text{C}$  NMR (101 MHz,  $\text{CHLOROFORM-D}$ )  $\delta$  166.7, 147.5, 128.9, 128.7, 125.5, 88.6, 52.1, 25.0. HRMS (EI+) calculated  $m/z$  for  $\text{C}_{21}\text{H}_{23}\text{BO}_6^+$  [ $\text{M}$ ] $^+$ : 382.1582, found 382.1585.

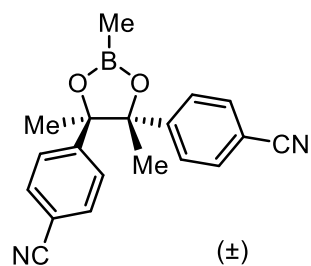

**(*R,R*)/(*S,S*)-4,4'-(2,4,5-trimethyl-1,3,2-dioxaborolane-4,5-diyl)dibenzonitrile (*dl*-5d):** White solid. Melting point: 212.0 – 213.4 °C. Eluent for the flash chromatography with silica gel: hexane / EA: 5/1. <sup>1</sup>H NMR (400 MHz, CHLOROFORM-D) δ 7.73 (d, *J* = 7.3 Hz, 4H), 7.57 (d, *J* = 7.8 Hz, 4H), 1.14 (s, 6H), 0.55 (s, 3H). <sup>13</sup>C NMR (101 MHz, CHLOROFORM-D) δ 147.5, 132.3, 126.5, 118.6, 112.0, 87.5, 27.4. HRMS (EI+) calculated *m/z* for C<sub>19</sub>H<sub>17</sub>BN<sub>2</sub>O<sub>2</sub><sup>+</sup> [*M*]<sup>+</sup>: 316.1378, found 316.1380.

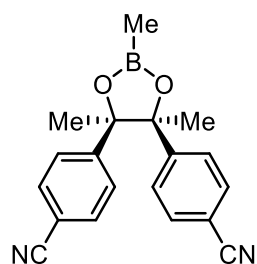

**(*R,S*)-4,4'-(2,4,5-trimethyl-1,3,2-dioxaborolane-4,5-diyl)dibenzonitrile (*meso*-5d):** White solid. Melting point: 141.7 – 143.2 °C. Eluent for the flash chromatography with silica gel: hexane / EA: 2/1. <sup>1</sup>H NMR (400 MHz, CHLOROFORM-D) δ 7.37 – 7.32 (m, 4H), 7.04 – 7.00 (m, 4H), 1.82 (s, 6H), 0.63 (s, 3H). <sup>13</sup>C NMR (101 MHz, CHLOROFORM-D) δ 147.6, 131.6, 126.3, 118.4, 111.2, 88.4, 24.8. HRMS (EI+) calculated *m/z* for C<sub>19</sub>H<sub>17</sub>BN<sub>2</sub>O<sub>2</sub><sup>+</sup> [*M*]<sup>+</sup>: 316.1378, found 316.1380.

## 10. Scope of Unsuccessful Derivatized Examples

The following bioactive compounds or drugs did not proceed well in the hydrogenated reaction for different reasons. The probenecid derivative suffered from competitive reductive coupling and reduction of the sulfonyl group, and the indomethacin derivative was interrupted by the dearomatized hydrogenation of the indole motif, while testosterone resulted in hydrogenation of the C=C double bond.

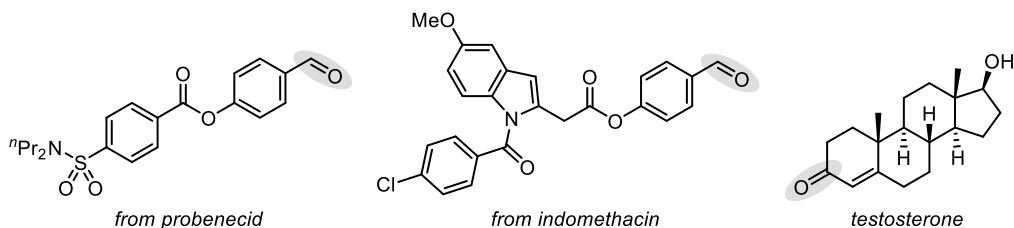

## 11. References

- [1] S. Mukherjee, R. A. Garza-Sanchez, A. Tlahuext-Aca, F. Glorius, *Angew. Chem. Int. Ed.* **2017**, *56*, 14723-14726.
- [2] M. Zhang, B. Wang, Y. Cao, Y. Liu, Z. Wang, Q. Wang, *Org. Lett.* **2022**, *24*, 8895-8900.
- [3] H. Jin, C. Gu, Z. Xiao, Q. Tan, L. Liu, L.-B. Han, W.-H. Chen, T. Chen, *Eur. J. Org. Chem.* **2023**, *26*, e202300397.
- [4] L. Tang, G. Lv, F. Jia, R. Zhao, X. Wang, Q. Zhou, *Adv. Synth. Catal.* **2024**, *366*, 70-76.
- [5] A. Call, C. Casadevall, F. Acuña-Parés, A. Casitas, J. Lloret-Fillol, *Chem. Sci.* **2017**, *8*, 4739-4749.
- [6] Z. Wei, H. Li, Y. Wang, Q. Liu, *Angew. Chem. Int. Ed.* **2023**, *62*, e202301042.
- [7] Q. Yu, D. Zhou, Y. Liu, X. Huang, C. Song, J. Ma, J. Li, *Org. Lett.* **2023**, *25*, 47-52.
- [8] A. R. White, R. A. Kozlowski, S.-C. Tsai, C. D. Vanderwal, *Angew. Chem. Int. Ed.* **2017**, *56*, 10525-10529.
- [9] K. S. Iyer, C. Nelson, B. H. Lipshutz, *Green Chem.* **2023**, *25*, 2663-2671.
- [10] M. Shibuya, T. Orihashi, Y. Li, Y. Yamamoto, *Chem. Commun.* **2021**, *57*, 8742-8745.
- [11] A. Nair, V. Tiwari, S. Rath, P. Saini, A. Verma, A. J. Elias, *Chem. Commun.* **2023**, *59*, 11117-11120.
- [12] Q. Chen, X. Kang, X. Zhang, Y. Cao, L. He, *J. Org. Chem.* **2023**, *88*, 5044-5051.
- [13] G. B. af Gennäs, V. Talman, O. Aitio, E. Ekokoski, M. Finel, R. K. Tuominen, J. Yli-Kauhaluoma, *J. Med. Chem.* **2009**, *52*, 3969-3981.
- [14] J.-C. Han, L.-Z. Liu, Y.-Y. Chang, G.-Z. Yue, J. Guo, L.-Y. Zhou, C.-C. Li, Z. Yang, *J. Org. Chem.* **2013**, *78*, 5492-5504.
- [15] M. Lenze, E. B. Bauer, *Chem. Commun.* **2013**, *49*, 5889-5891.
- [16] C. M. Levinn, A. K. Steiger, M. D. Pluth, *ACS Chemical Biology* **2019**, *14*, 170-175.
- [17] D. Peng, M. Zhang, Z. Huang, *Chem. Eur. J.* **2015**, *21*, 14737-14741.
- [18] Q. Xuan, C. Zhao, Q. Song, *Org. Biomol. Chem.* **2017**, *15*, 5140-5144.
- [19] B. Bueno, S. Heurtaux, A. Gagnon, *J. Org. Chem.* **2023**, *88*, 13351-13357.
- [20] T.-S. Chen, H. Long, Y. Gao, H.-C. Xu, *Angew. Chem. Int. Ed.* **2023**, *62*, e202310138.
- [21] J. M. Paolillo, A. D. Duke, E. S. Gogarnoiu, D. E. Wise, M. Parasram, *J. Am. Chem. Soc.* **2023**, *145*, 2794-2799.
- [22] L. Hackl, L. P. Ho, D. Bockhardt, T. Bannenberg, M. Tamm, *Organometallics* **2022**, *41*, 836-851.
- [23] T. B. Boit, M. M. Mehta, N. K. Garg, *Org. Lett.* **2019**, *21*, 6447-6451.
- [24] Z. Peralta-Neel, K. A. Woerpel, *Org. Lett.* **2021**, *23*, 5002-5006.
- [25] R. A. Fernandes, G. V. Ramakrishna, V. Bethi, *Org. Biomol. Chem.* **2020**, *18*, 6115-6125.
- [26] S. Yadav, M. Rao Kuram, *Eur. J. Org. Chem.* **2023**, *26*, e202201344.
- [27] B. Ardiansah, H. Tanimoto, T. Tomohiro, T. Morimoto, K. Kakiuchi, *Chem. Commun.* **2021**, *57*, 8738-8741.
- [28] N. F. Both, A. Spannenberg, H. Jiao, K. Junge, M. Beller, *Angew. Chem. Int. Ed.* **2023**, *62*, e202307987.
- [29] M. Billamboz, N. Sotto, C. Chevrin-Villette, C. Len, *RSC Adv.* **2015**, *5*, 46026-46030.
- [30] Y. Yan, G. Li, J. Ma, C. Wang, J. Xiao, D. Xue, *Green Chem.* **2023**, *25*, 4129-4136.

- [31] S. Okamoto, H. Tsujioka, A. Sudo, *Chem. Lett.* **2018**, 47, 369-372.
- [32] C. Yang, G. Magallanes, S. Maldonado, C. R. J. Stephenson, *J. Org. Chem.* **2021**, 86, 15927-15934.
- [33] X. Guo, Y. Zuo, G. A. Alvarez, E. Mejía, *Eur. J. Org. Chem.* **2023**, 26, e202300904.
- [34] D. J. Scott, N. A. Phillips, J. S. Sapsford, A. C. Deacy, M. J. Fuchter, A. E. Ashley, *Angew. Chem. Int. Ed.* **2016**, 55, 14738-14742.

## 12. Copies of $^1\text{H}$ , $^{13}\text{C}\{^1\text{H}\}$ , $^{19}\text{F}$ NMR Spectra for Synthesized Compounds

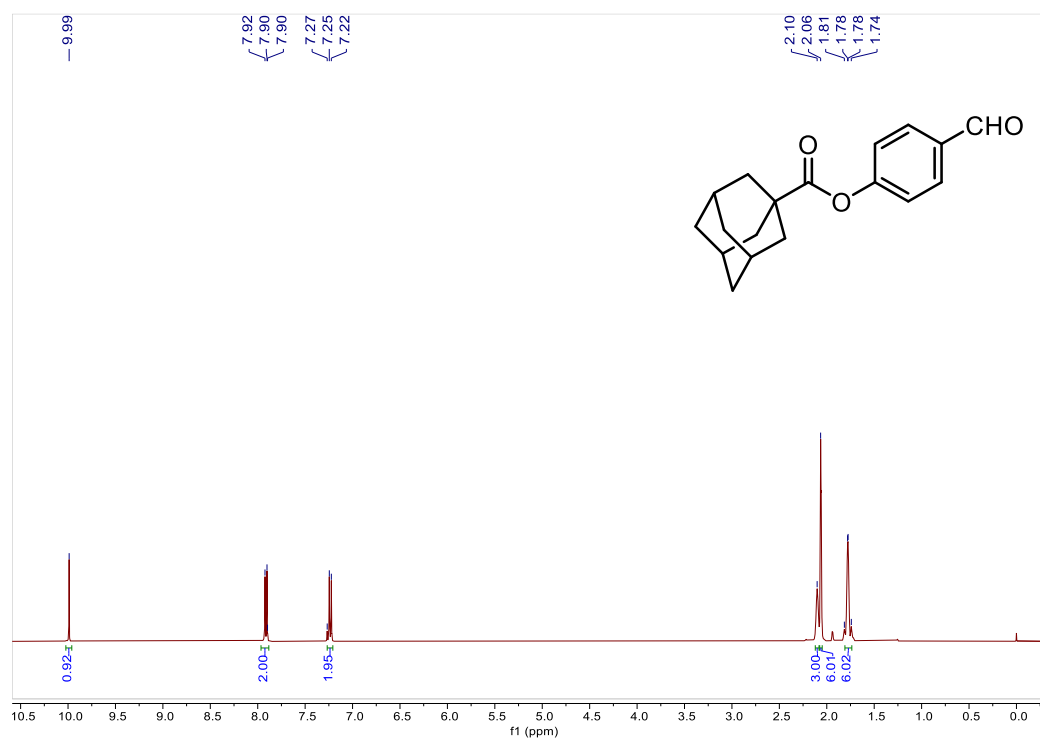

$^1\text{H}$  NMR for compound **1u**

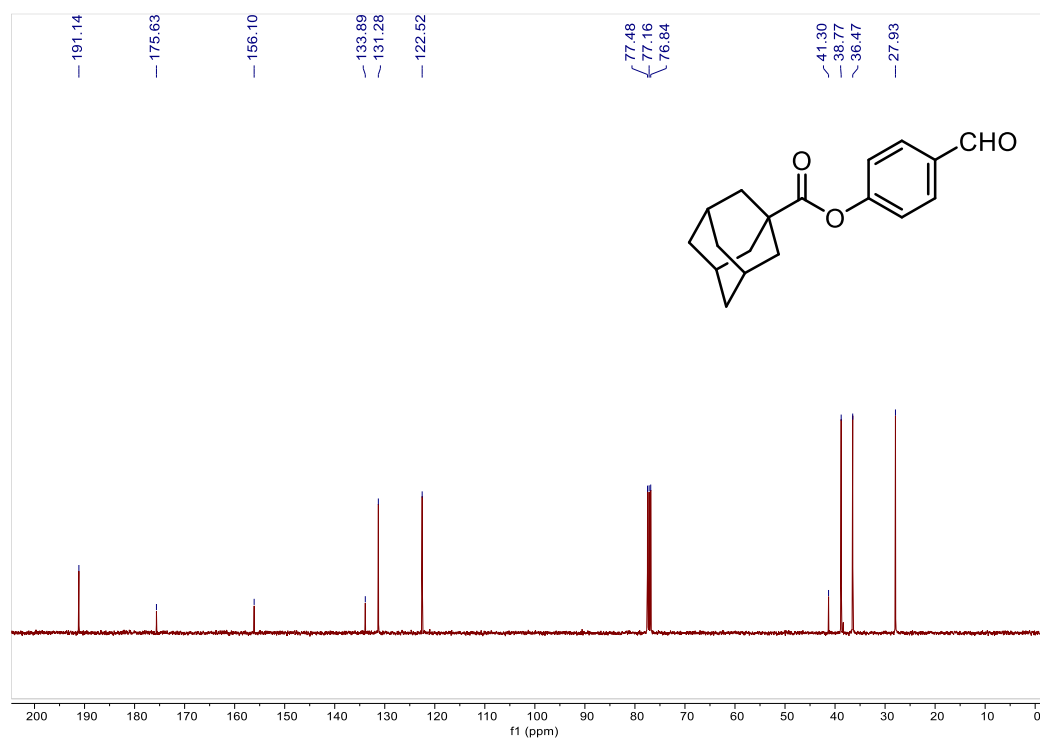

$^{13}\text{C}\{^1\text{H}\}$  NMR for compound **1u**

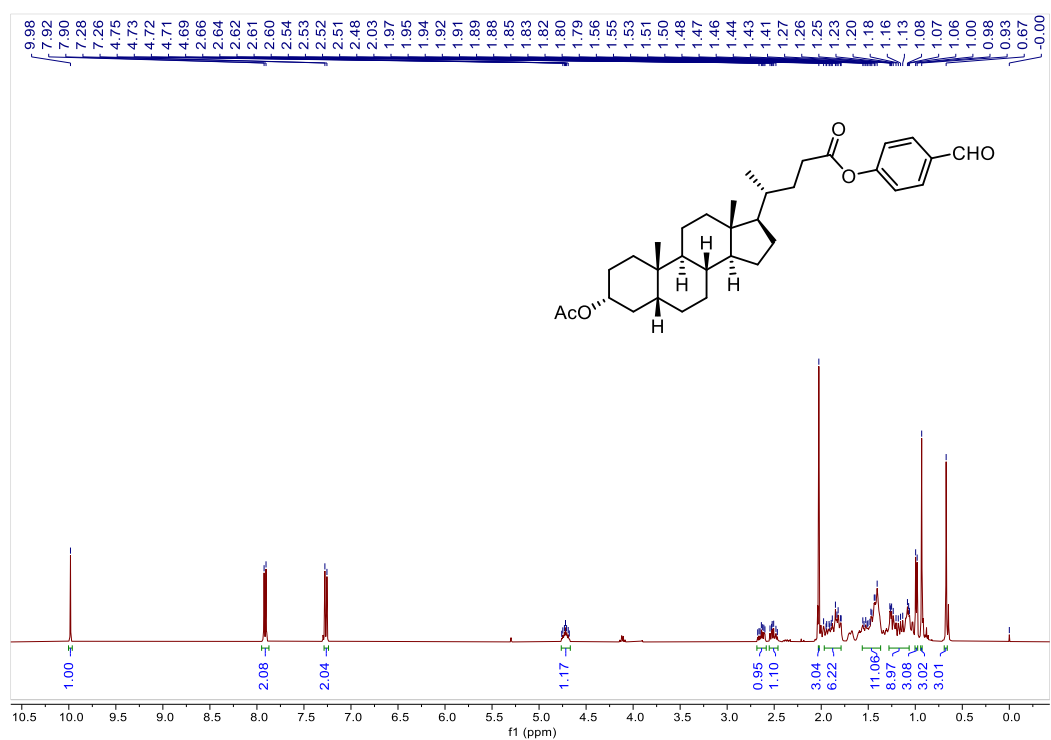

<sup>1</sup>H NMR for compound 1v

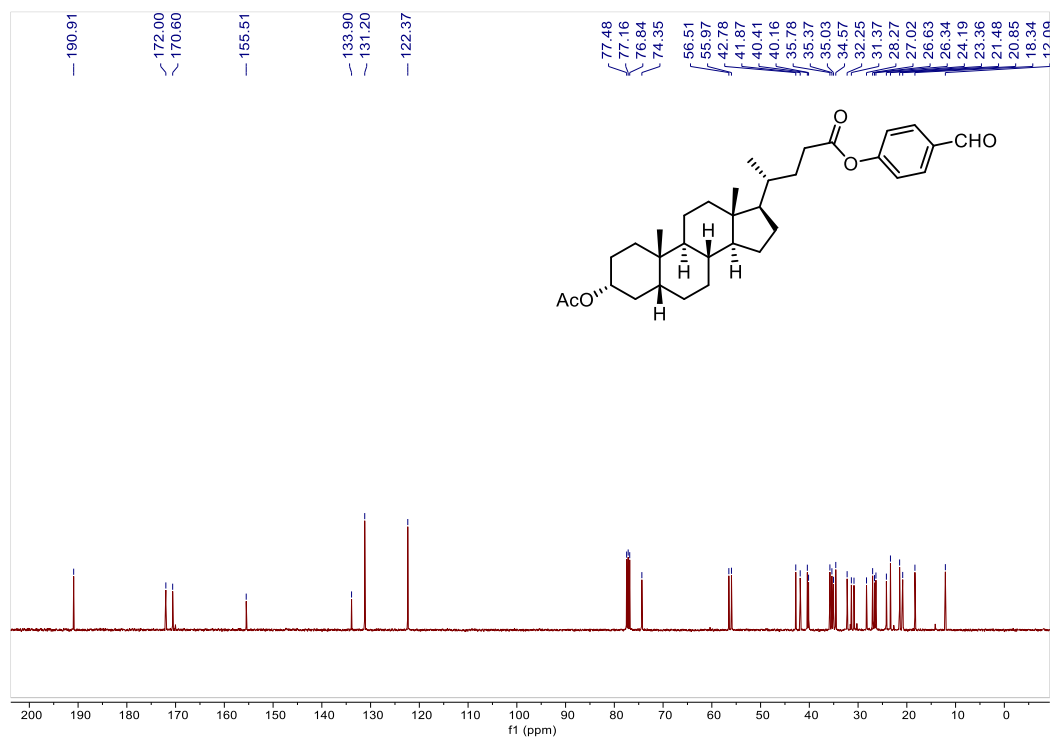

<sup>13</sup>C{<sup>1</sup>H} NMR for compound 1v



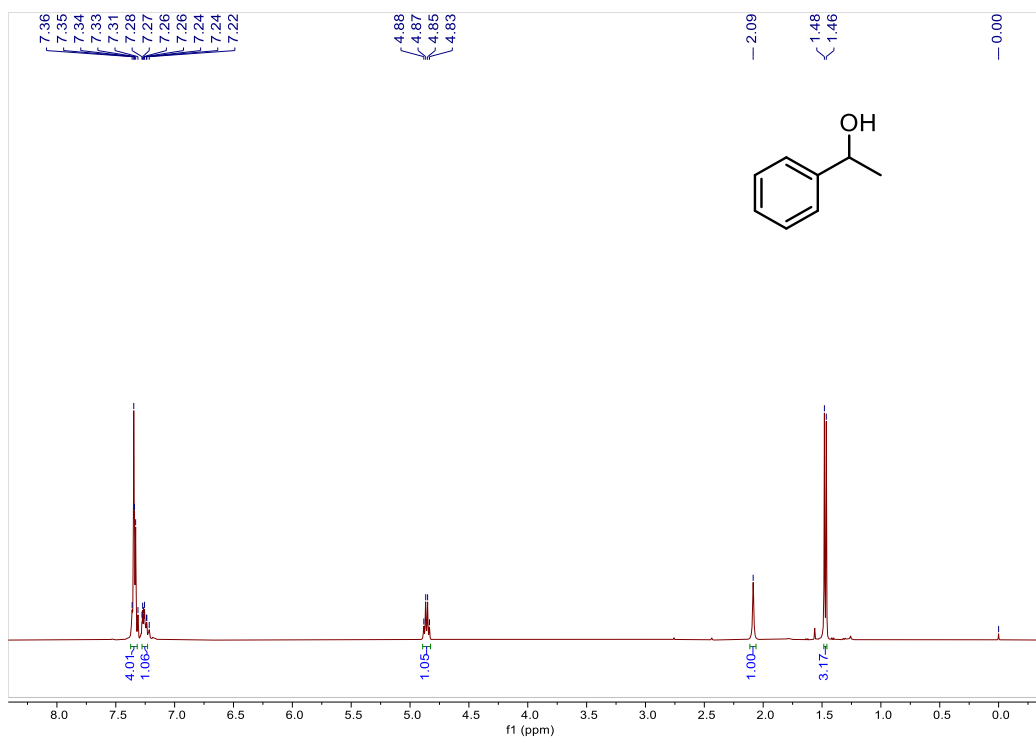

<sup>1</sup>H NMR for compound **2a**

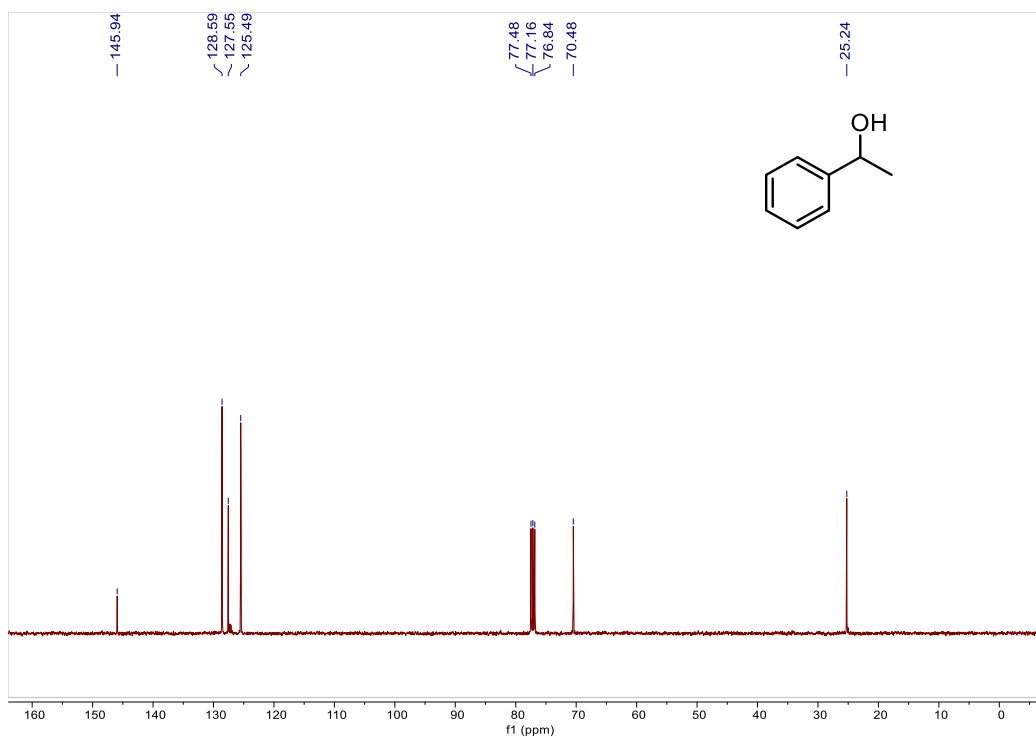

<sup>13</sup>C{<sup>1</sup>H} NMR for compound **2a**

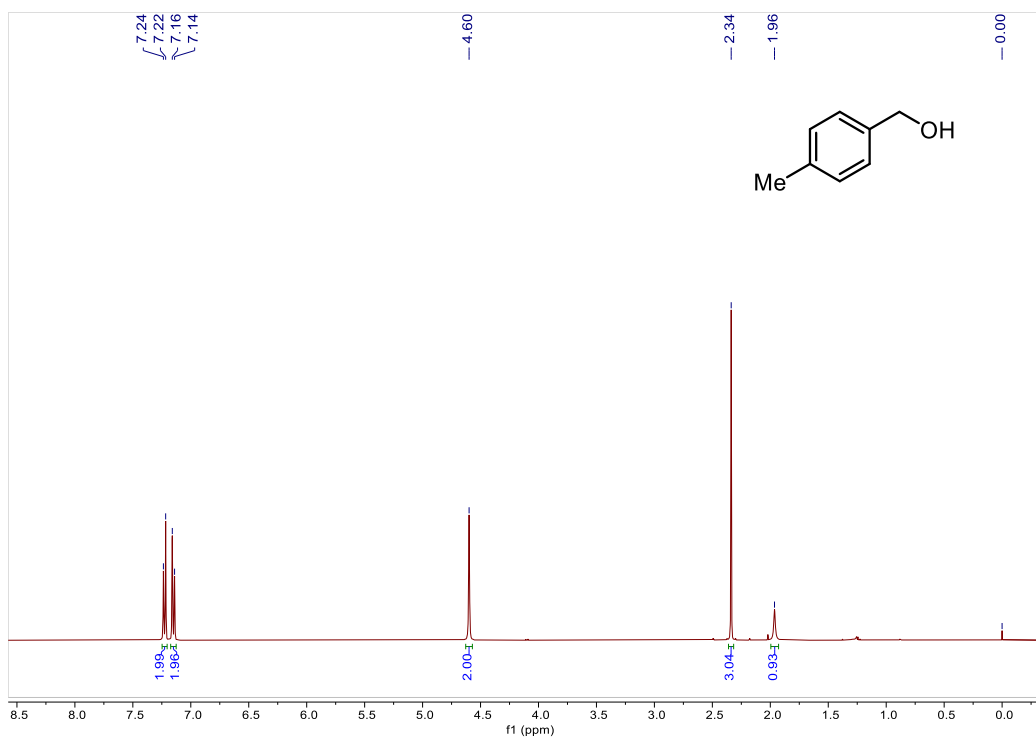

<sup>1</sup>H NMR for compound **2b**

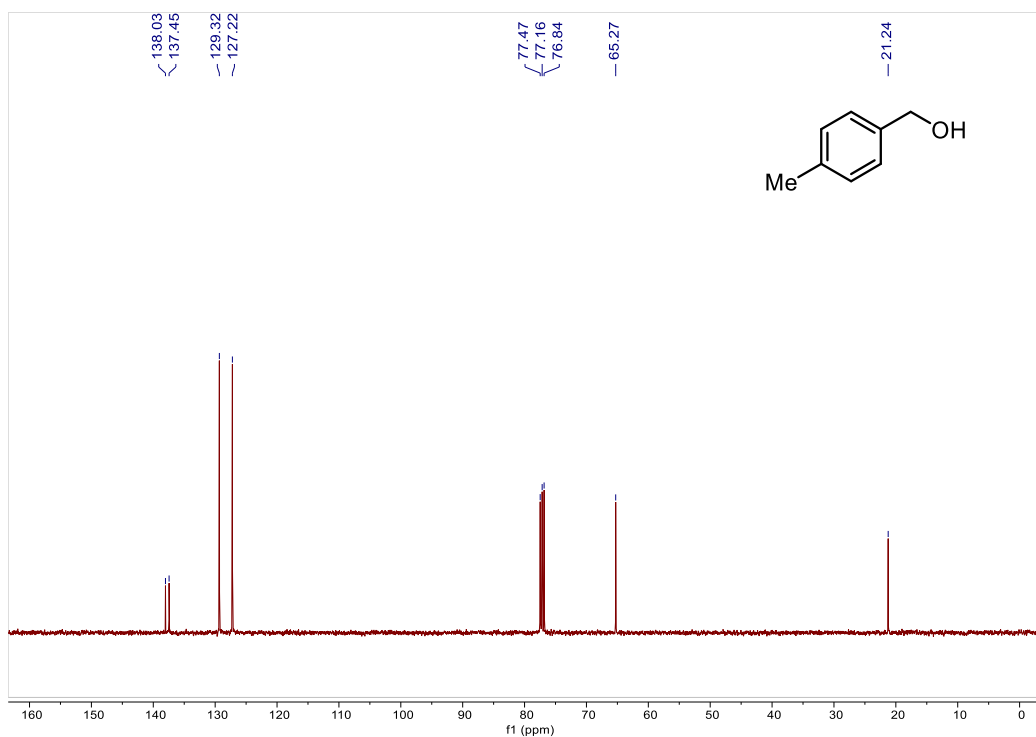

<sup>13</sup>C{<sup>1</sup>H} NMR for compound **2b**

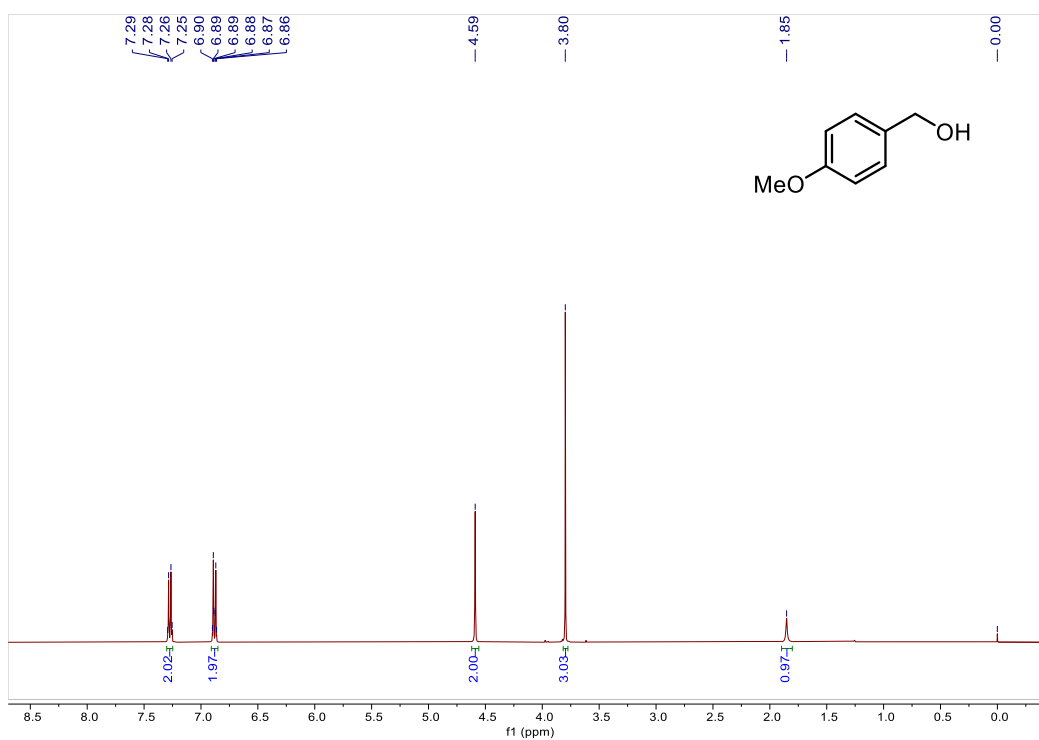

<sup>1</sup>H NMR for compound **2c**

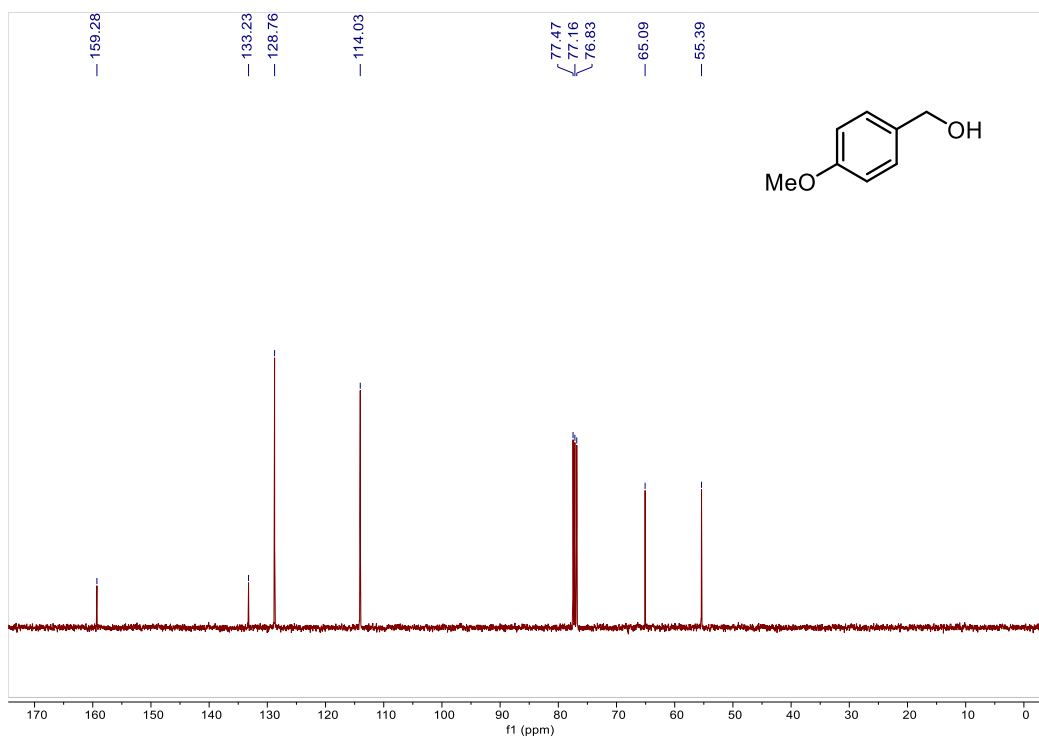

<sup>13</sup>C {<sup>1</sup>H} NMR for compound **2c**

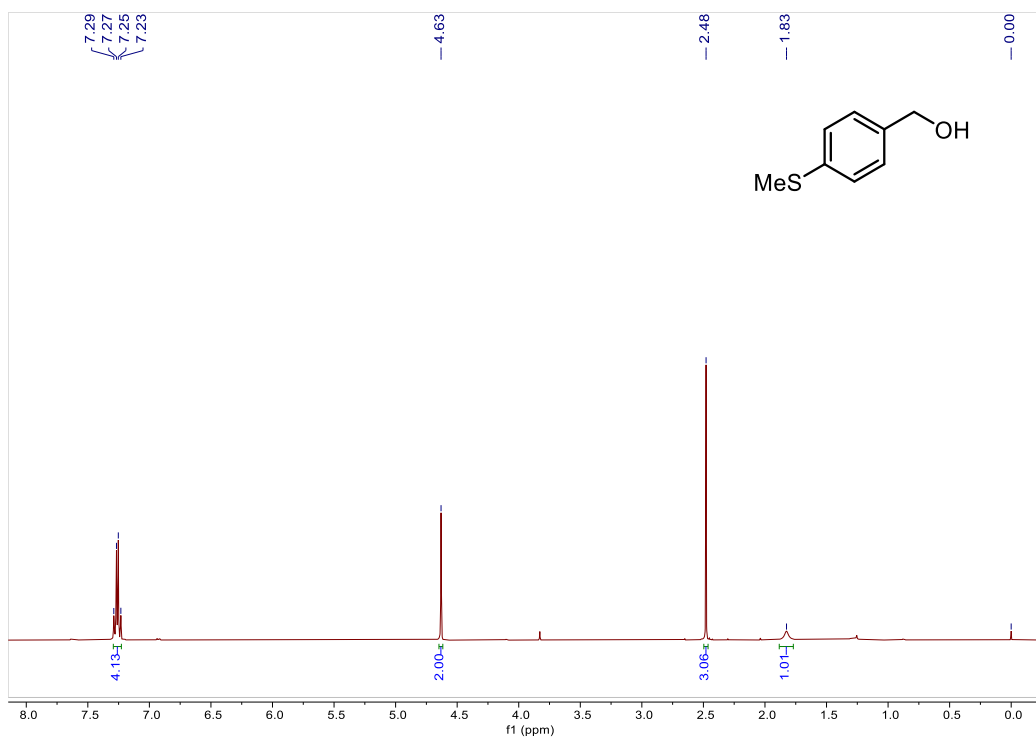

<sup>1</sup>H NMR for compound **2d**

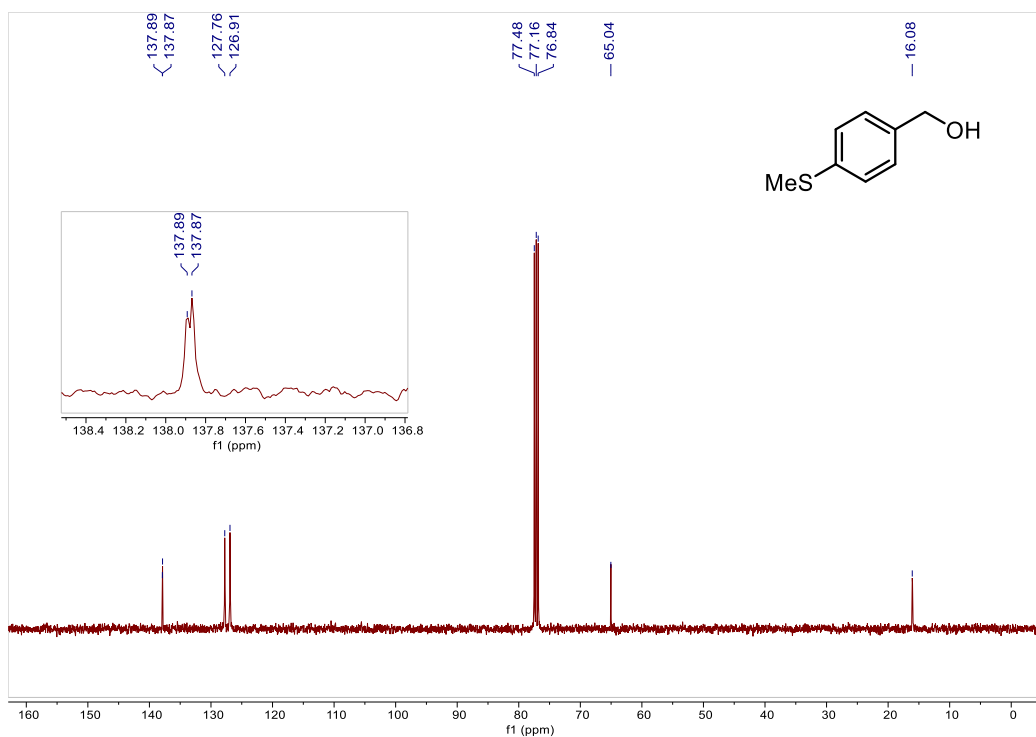

<sup>13</sup>C{<sup>1</sup>H} NMR for compound **2d**

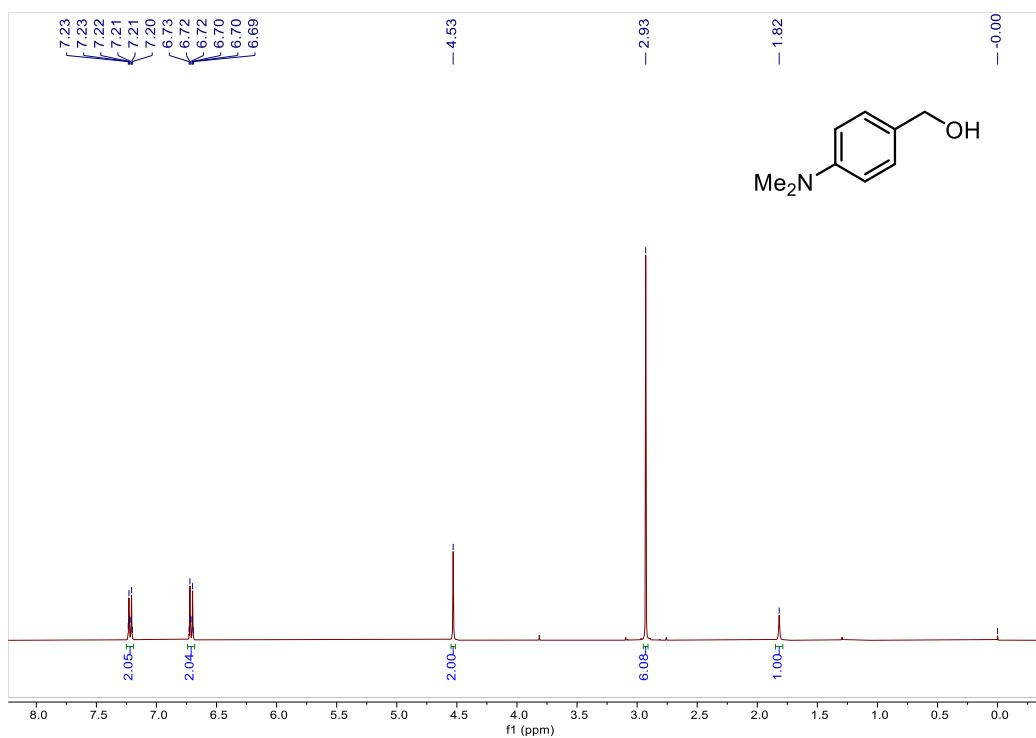

<sup>1</sup>H NMR for compound **2e**

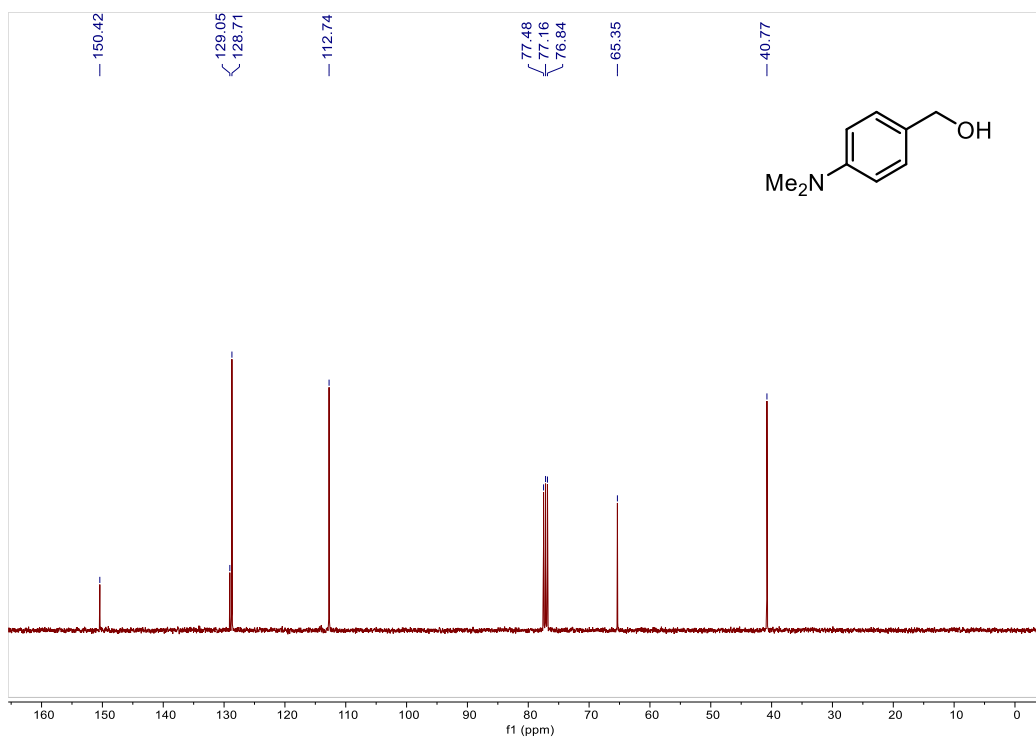

<sup>13</sup>C{<sup>1</sup>H} NMR for compound **2e**

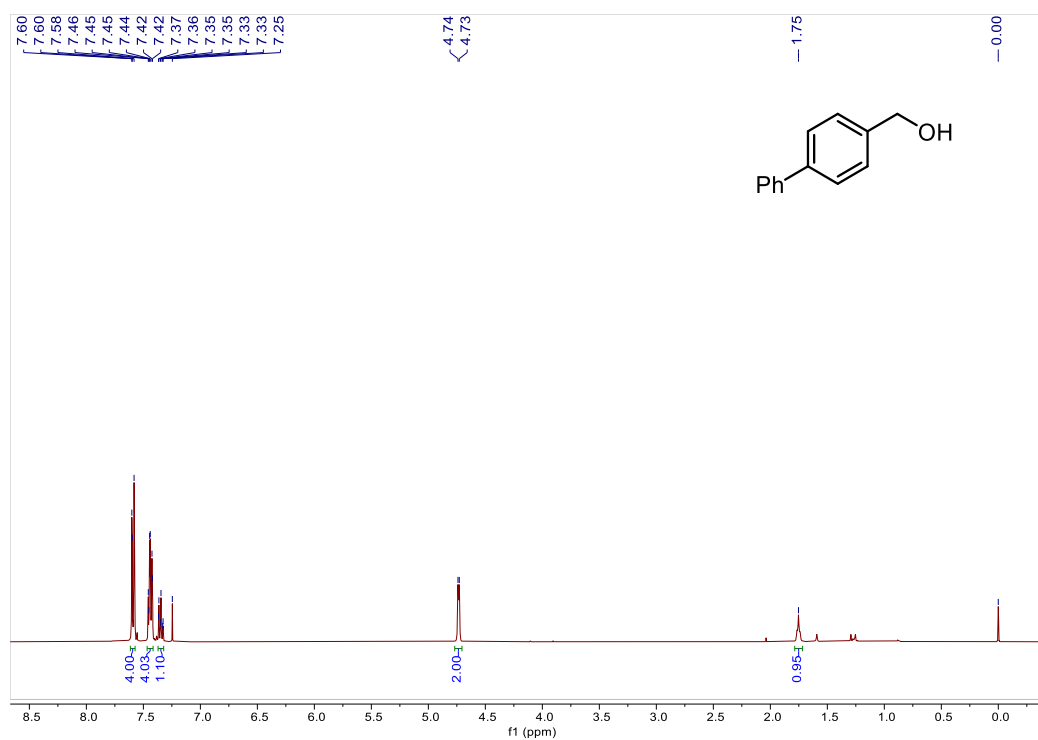

<sup>1</sup>H NMR for compound **2f**

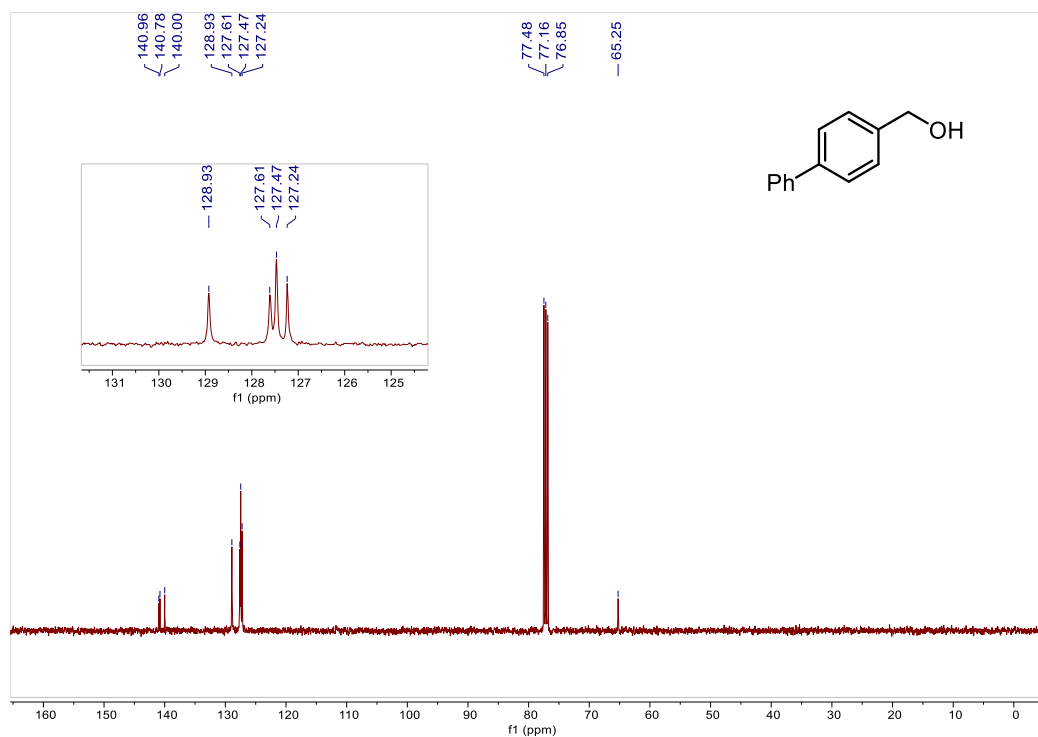

<sup>13</sup>C{<sup>1</sup>H} NMR for compound **2f**

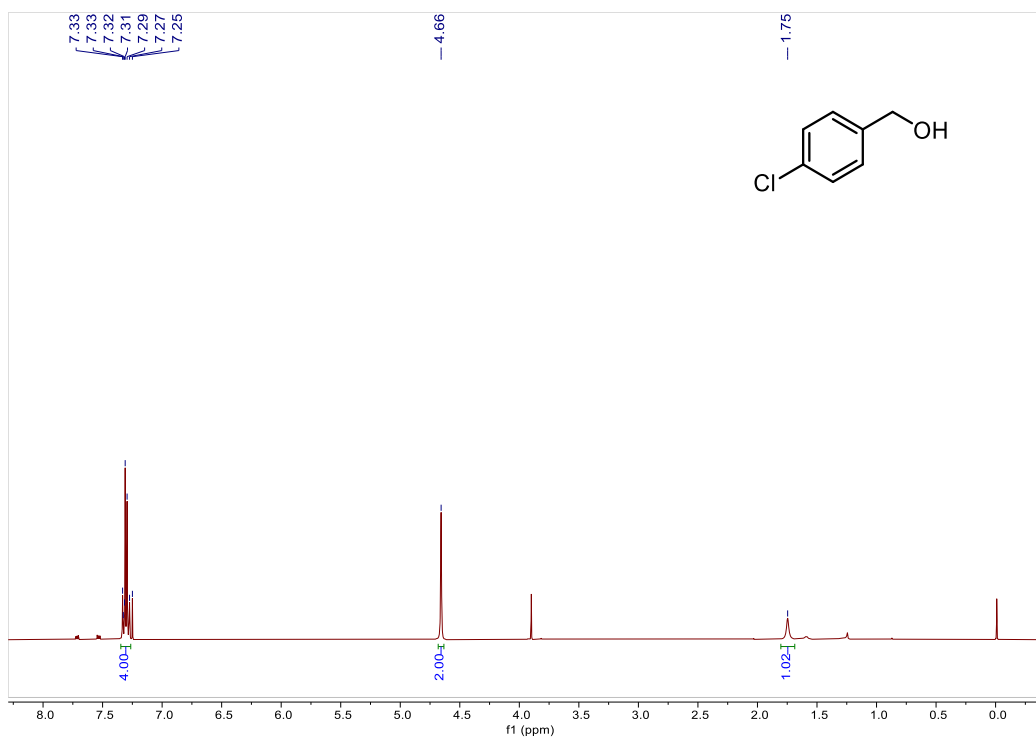

<sup>1</sup>H NMR for compound **2g**

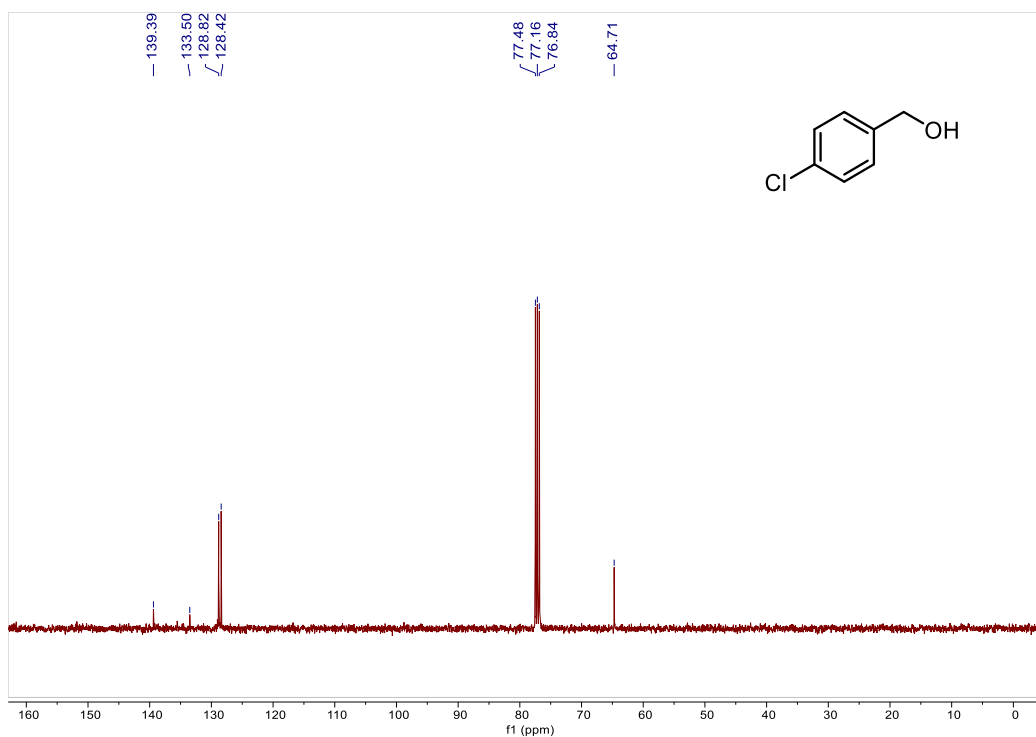

<sup>13</sup>C{<sup>1</sup>H} NMR for compound **2g**

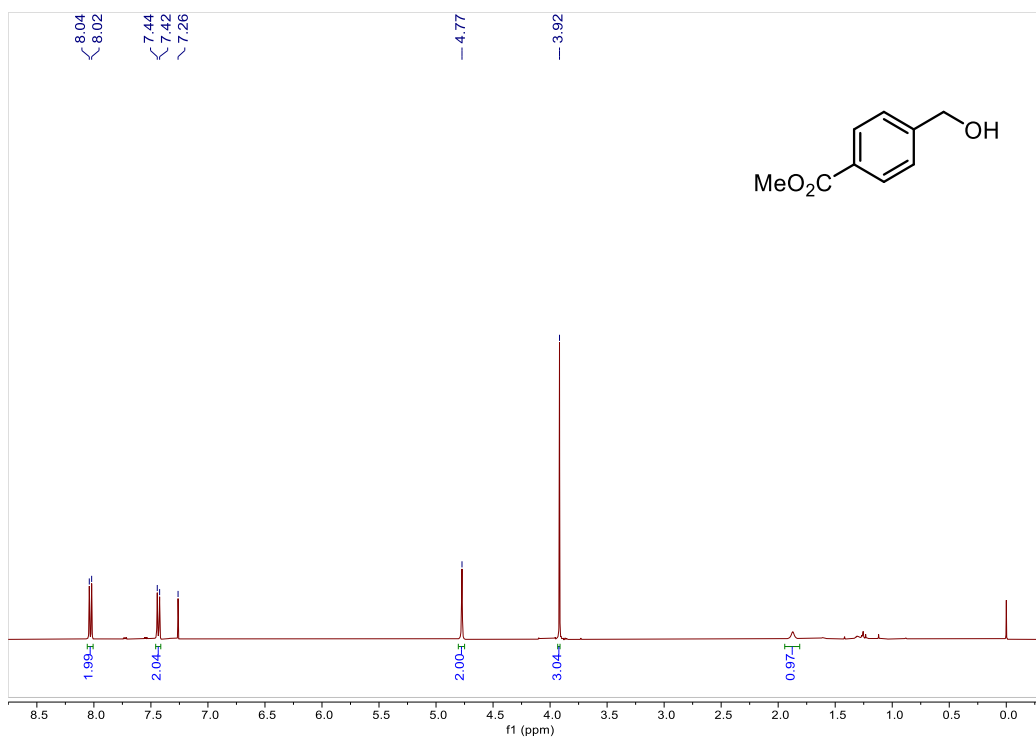

$^1\text{H}$  NMR for compound **2h**

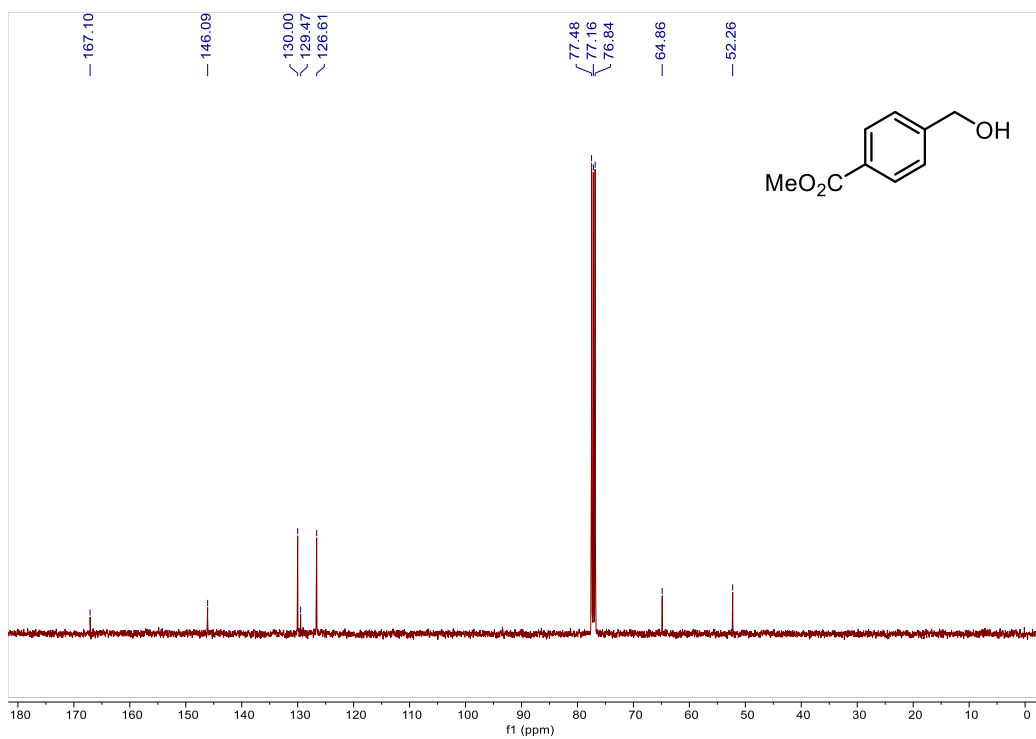

$^{13}\text{C}\{^1\text{H}\}$  NMR for compound **2h**



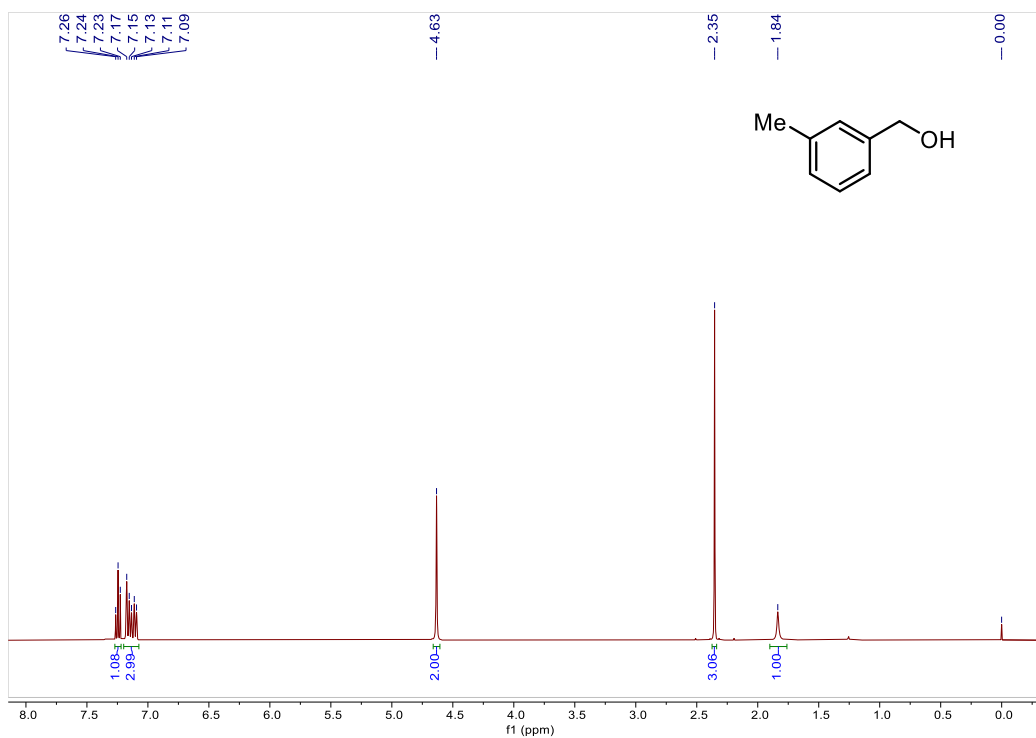

<sup>1</sup>H NMR for compound **2i**

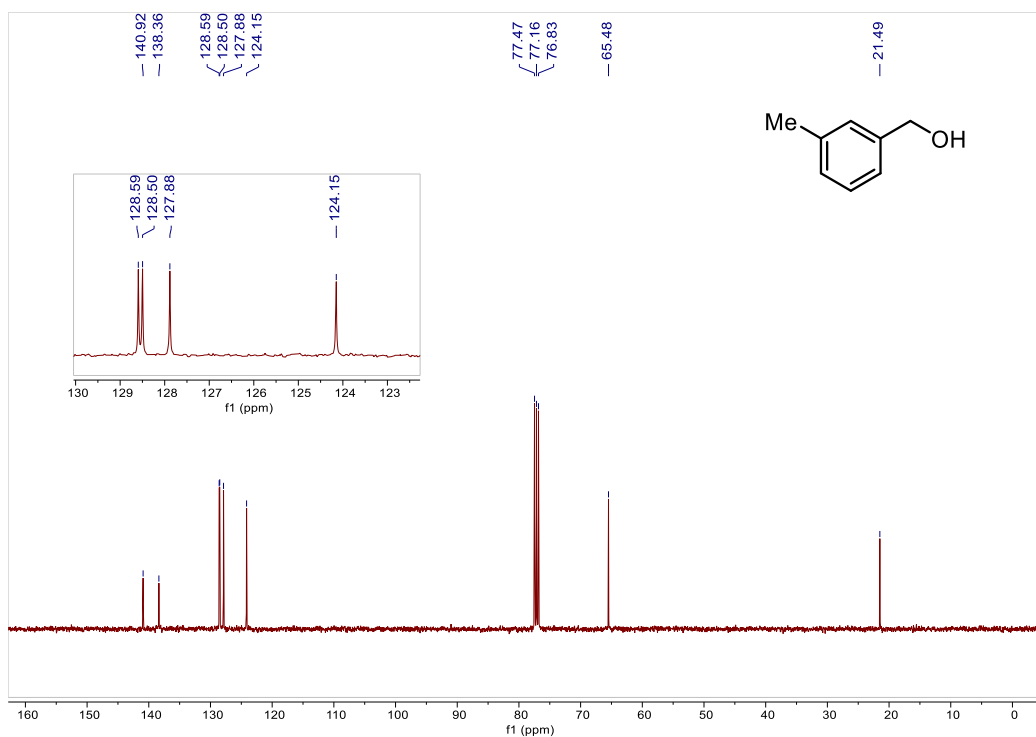

<sup>13</sup>C{<sup>1</sup>H} NMR for compound **2i**

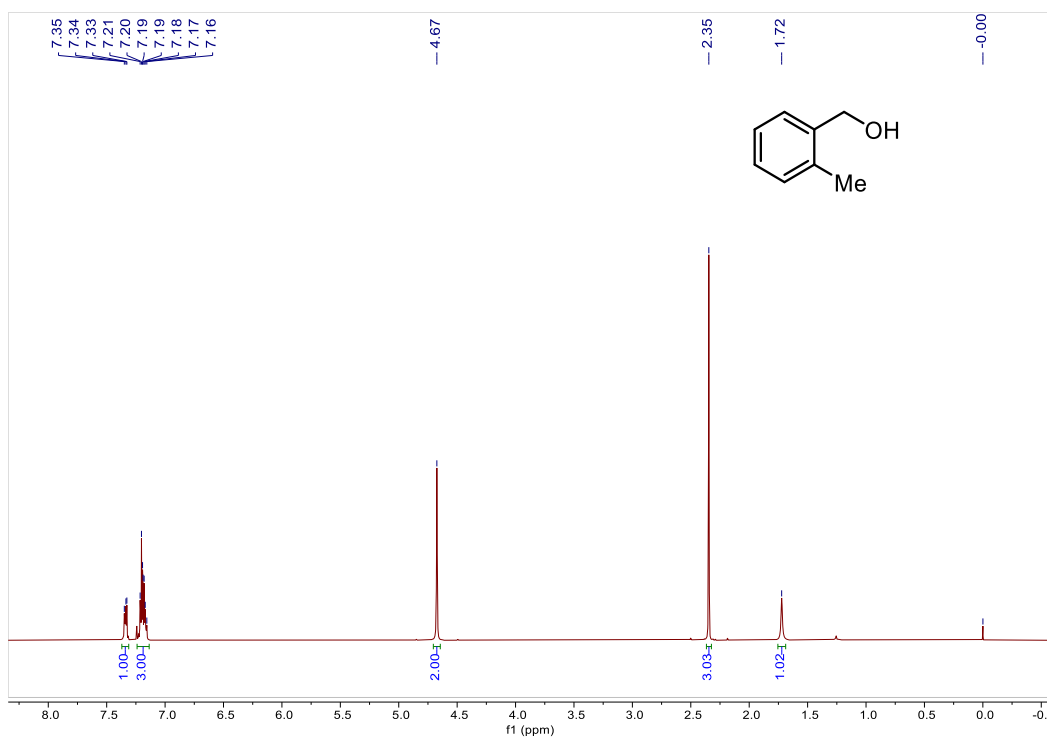

<sup>1</sup>H NMR for compound **2j**

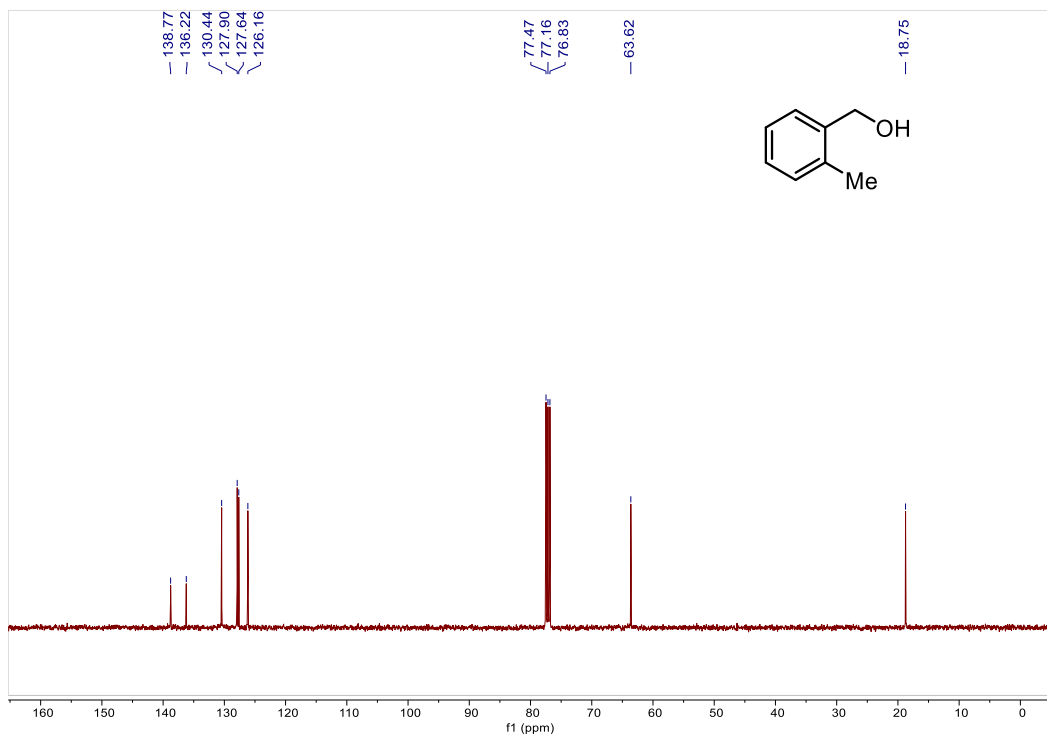

<sup>13</sup>C{<sup>1</sup>H} NMR for compound **2j**

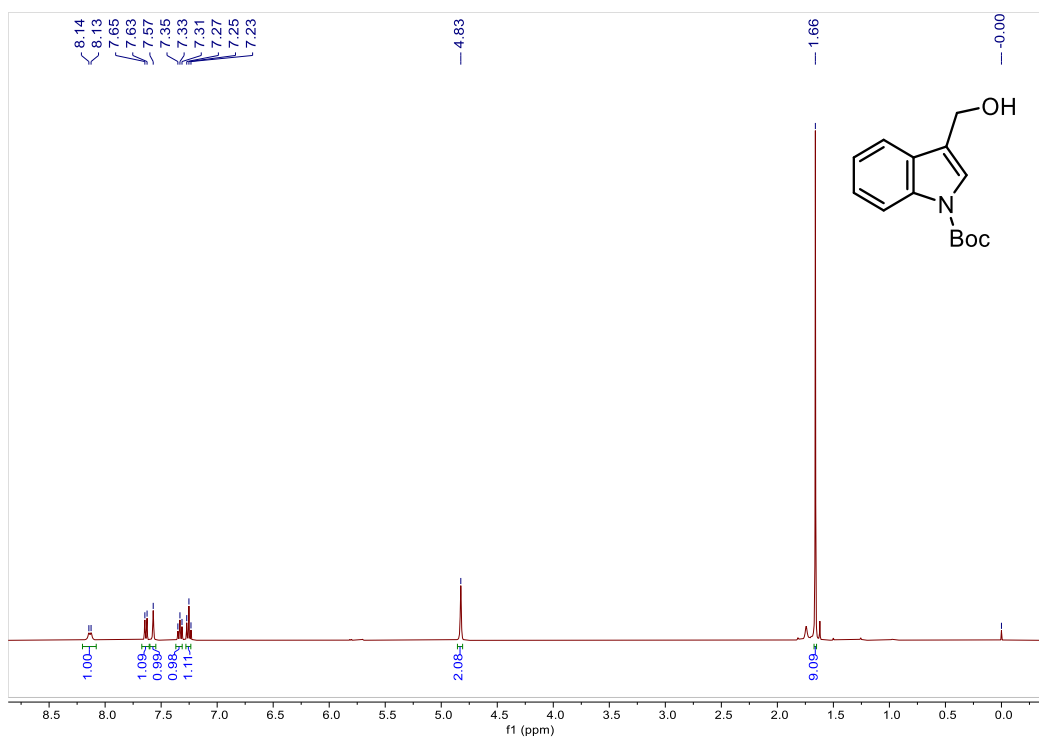

<sup>1</sup>H NMR for compound **2k**

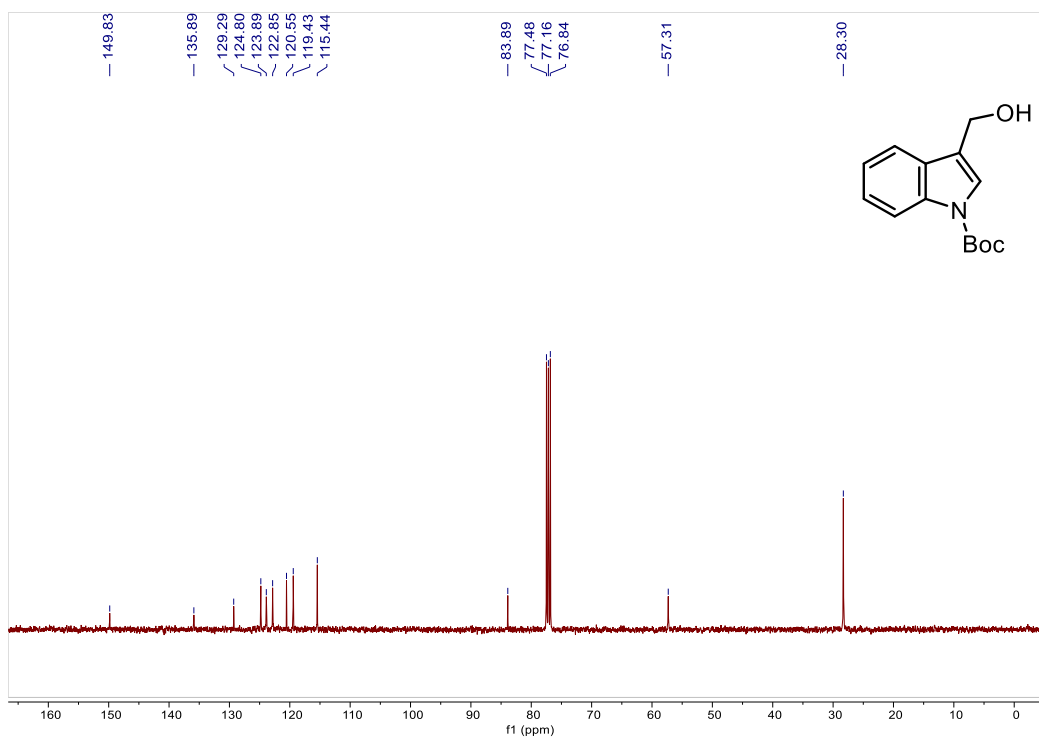

<sup>13</sup>C{<sup>1</sup>H} NMR for compound **2k**

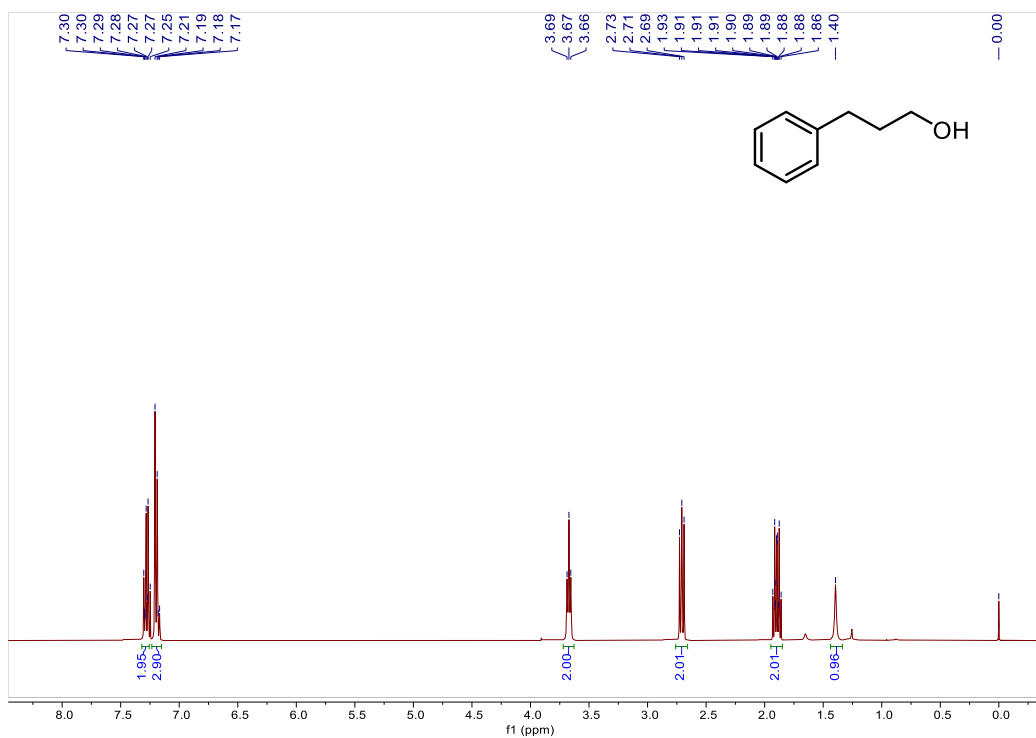

<sup>1</sup>H NMR for compound **21**

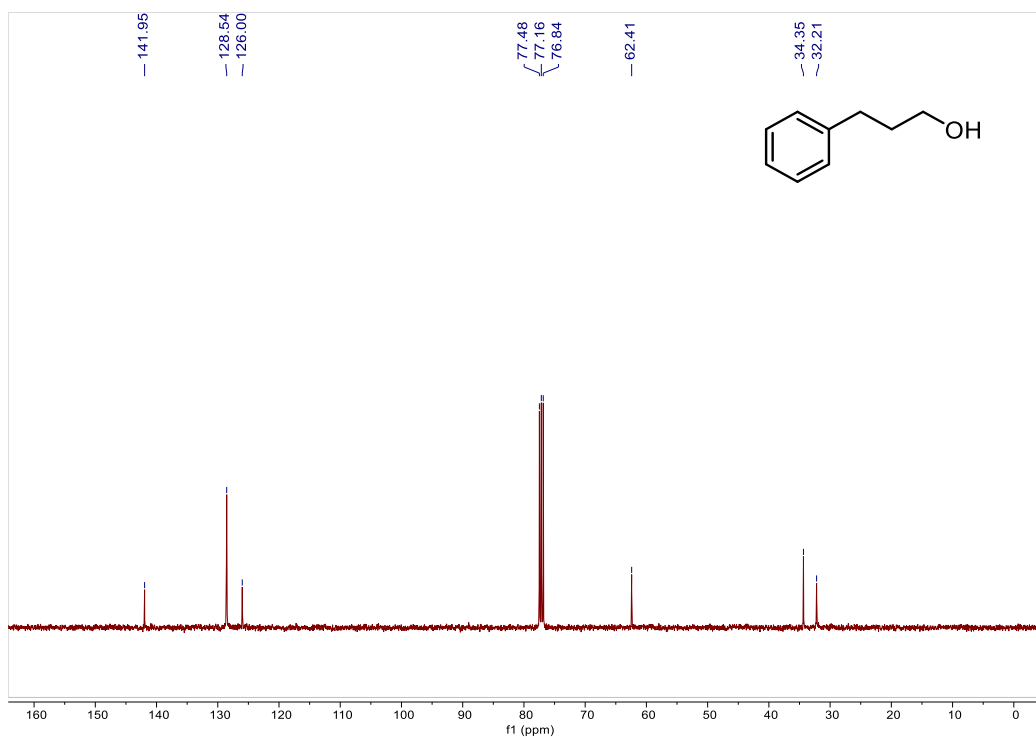

<sup>13</sup>C{<sup>1</sup>H} NMR for compound **21**

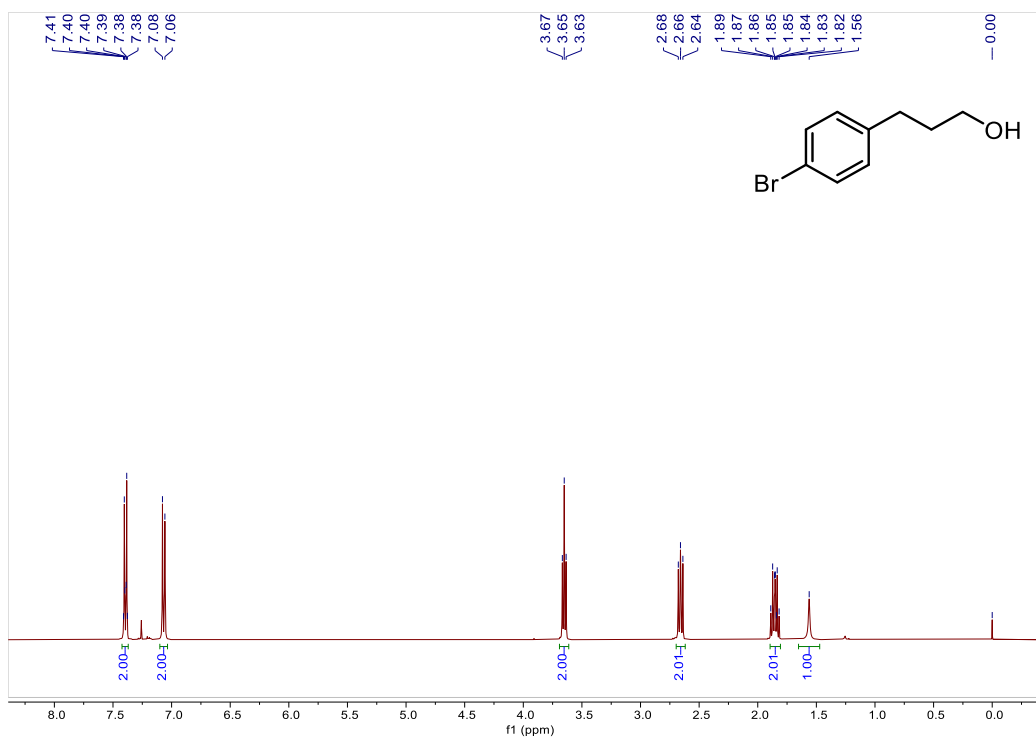

<sup>1</sup>H NMR for compound **2m**

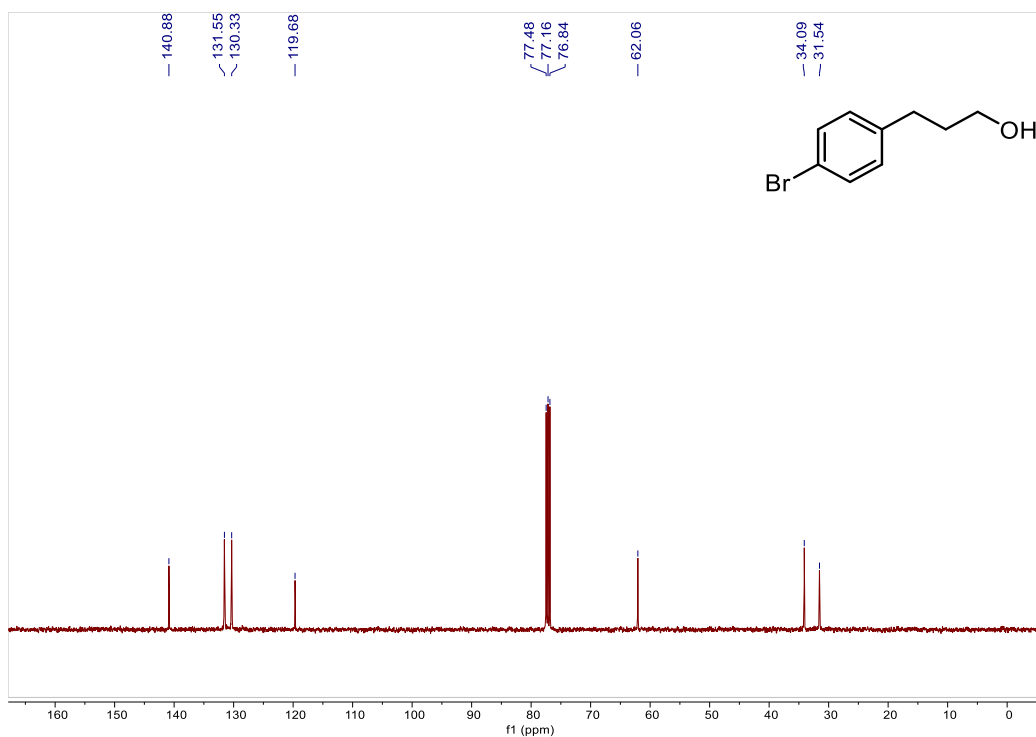

<sup>13</sup>C{<sup>1</sup>H} NMR for compound **2m**

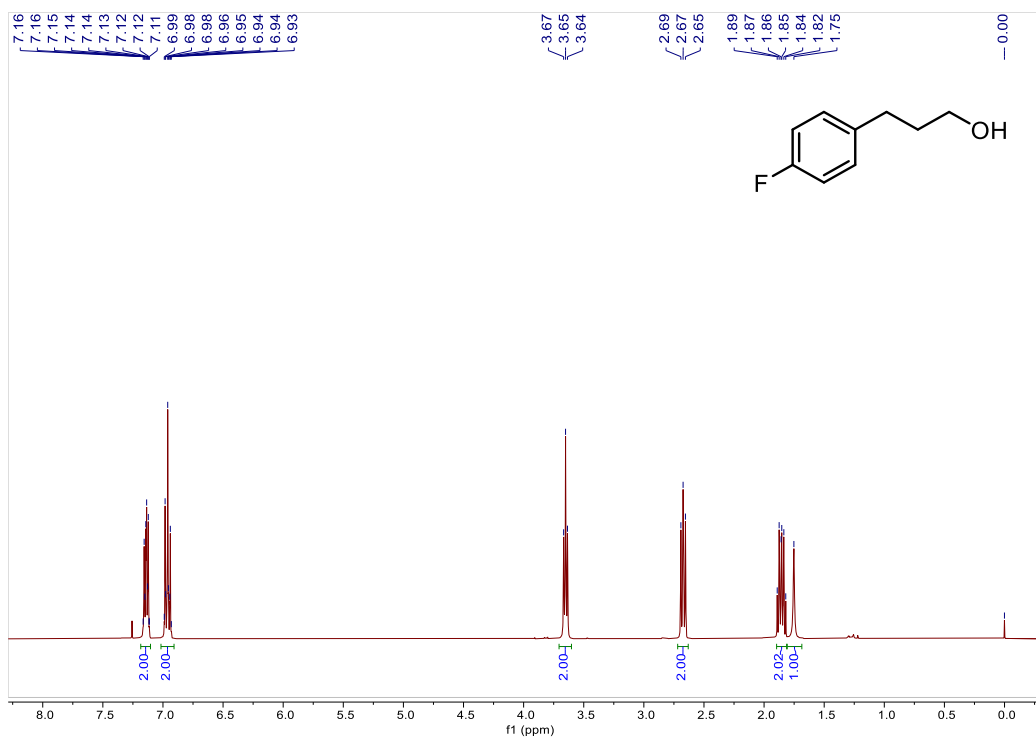

<sup>1</sup>H NMR for compound **2n**

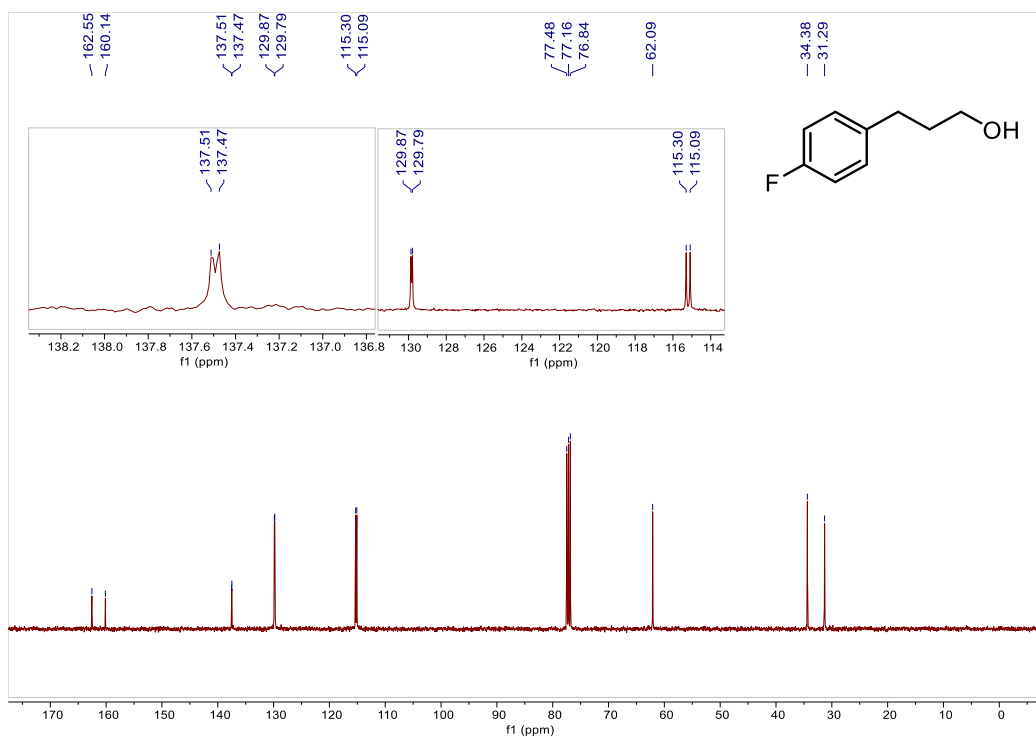

<sup>13</sup>C{<sup>1</sup>H} NMR for compound **2n**

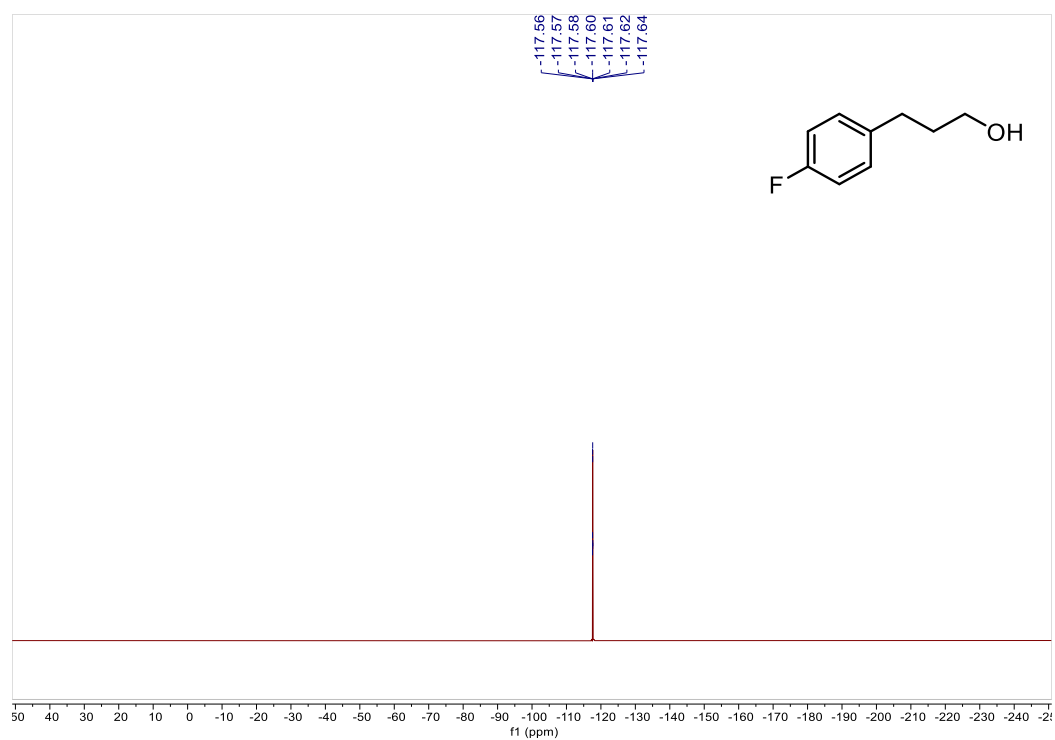

$^{19}\text{F}$  NMR for compound **2n**

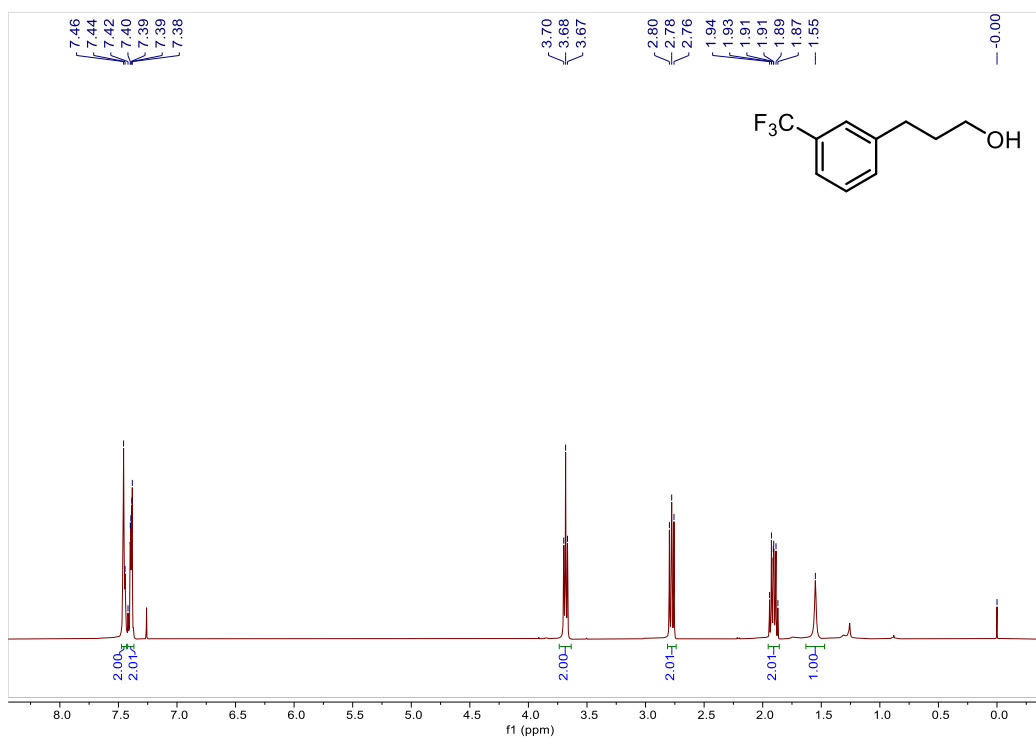

$^1\text{H}$  NMR for compound **2o**

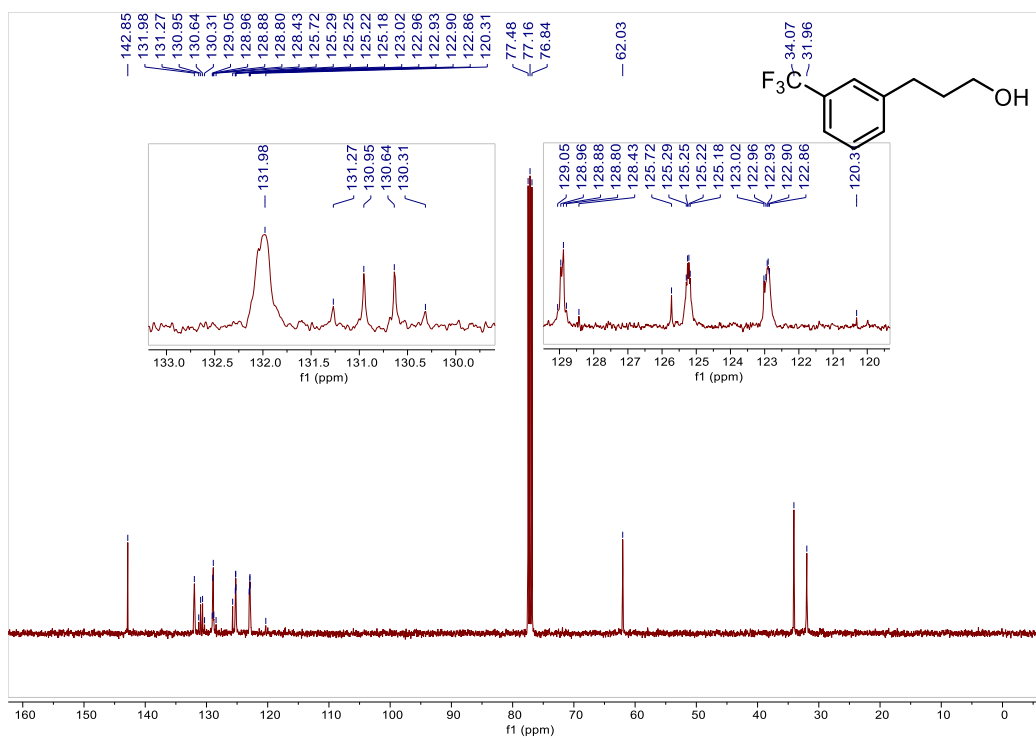

$^{13}\text{C}\{^1\text{H}\}$  NMR for compound **2o**



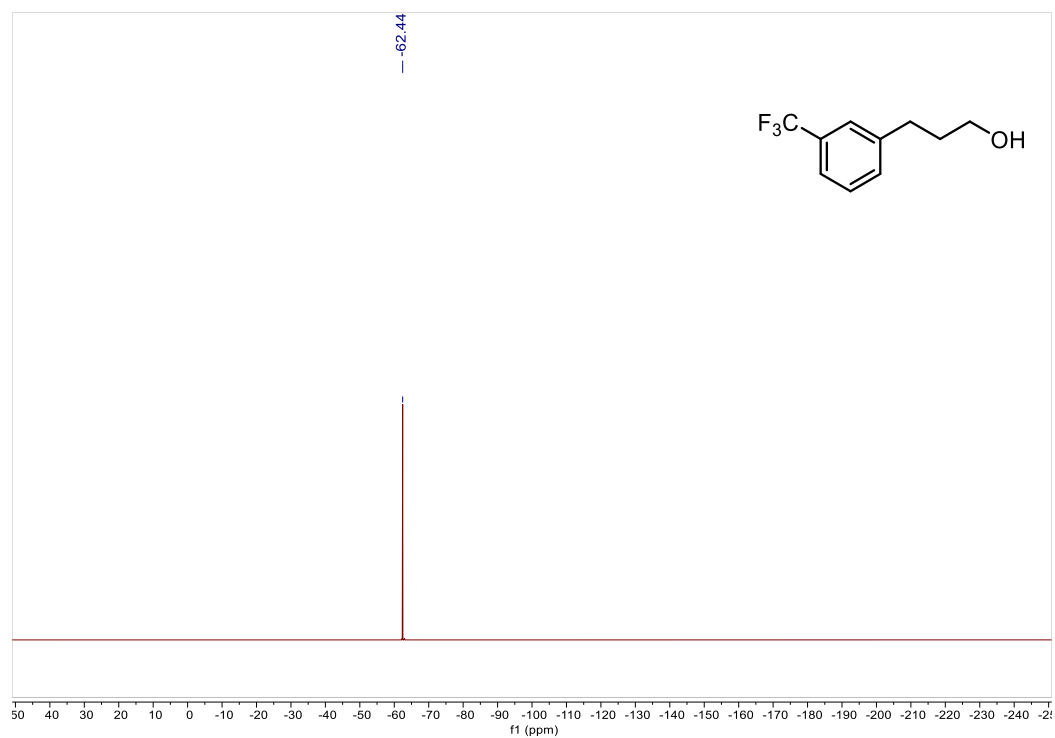

$^{19}\text{F}$  NMR for compound **2o**

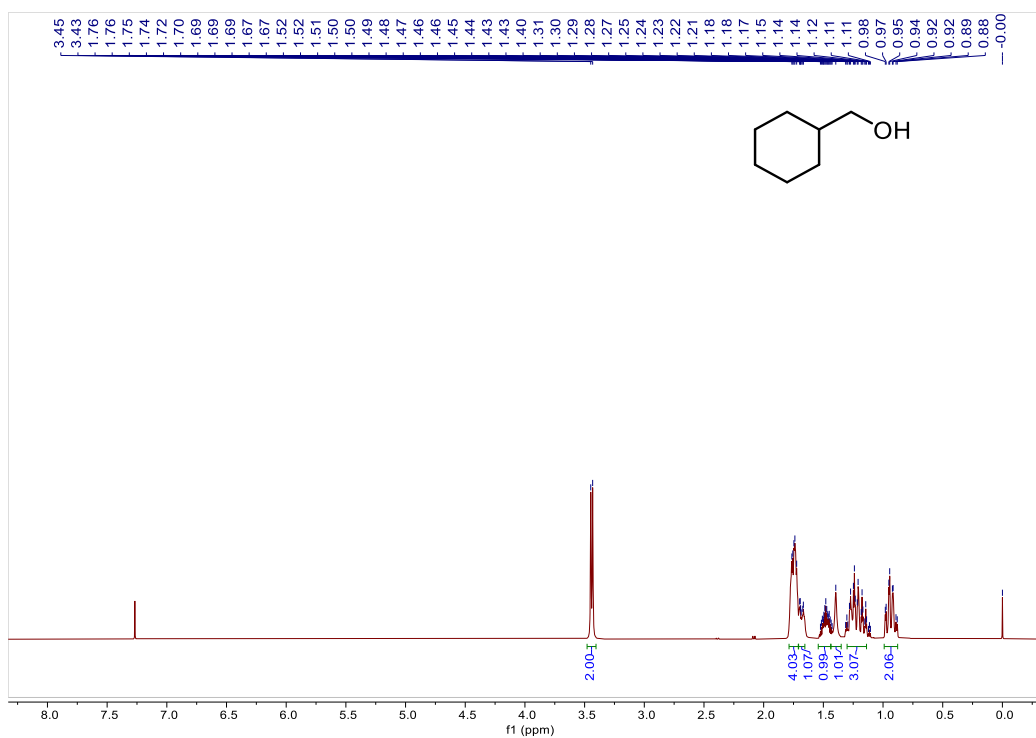

<sup>1</sup>H NMR for compound **2p**

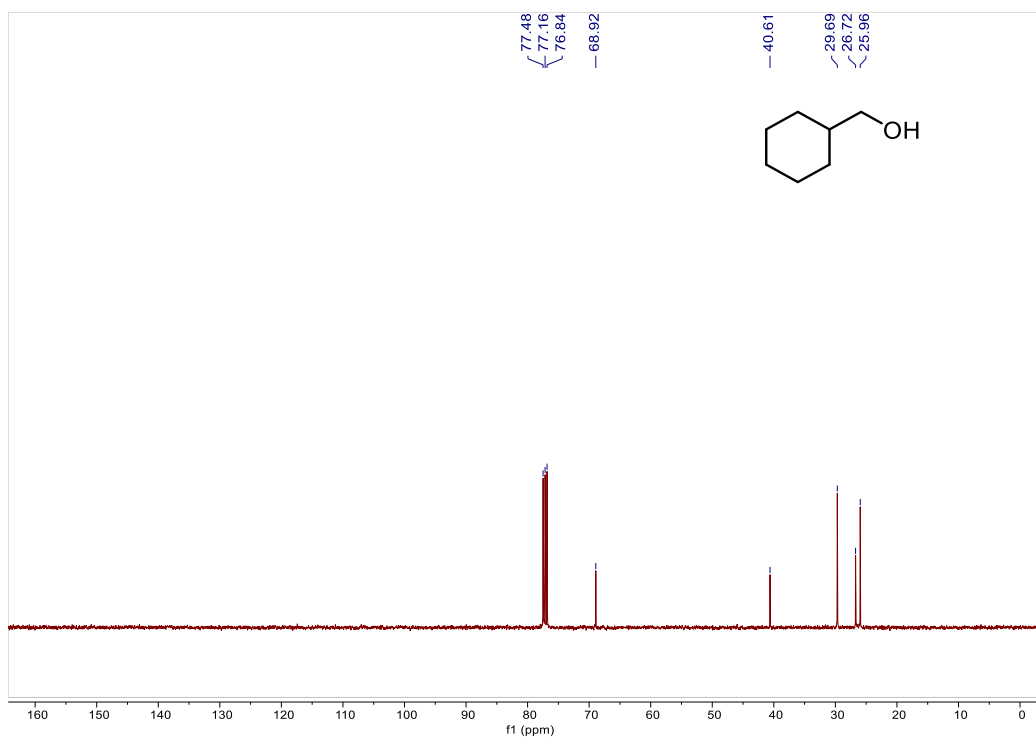

<sup>13</sup>C{<sup>1</sup>H} NMR for compound **2p**

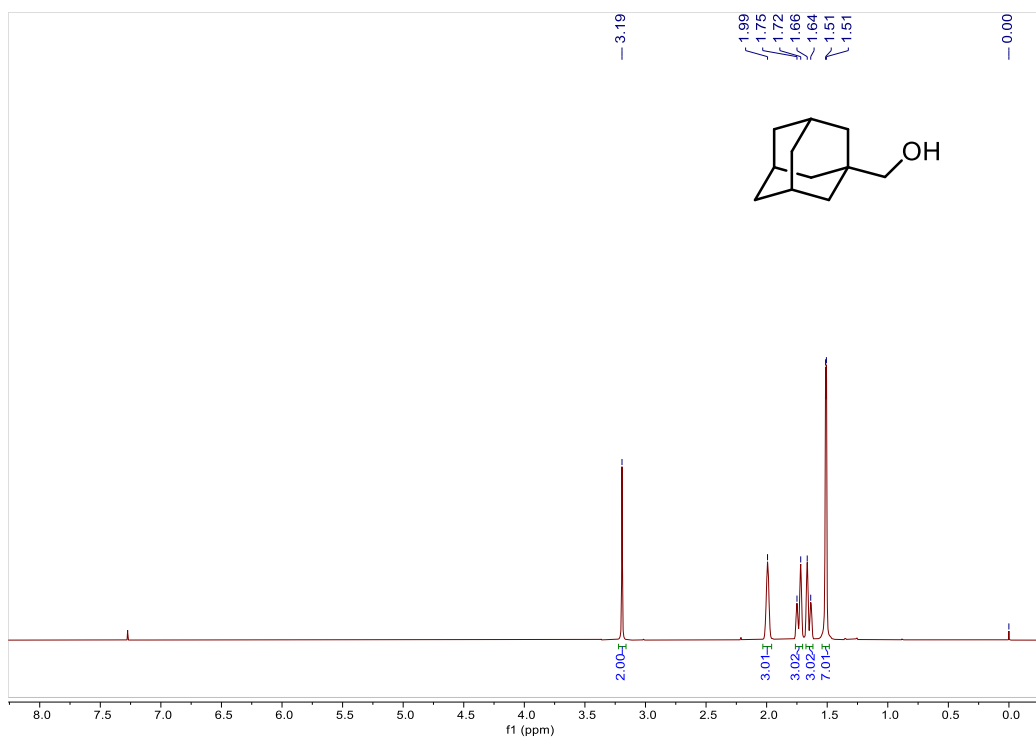

<sup>1</sup>H NMR for compound **2q**

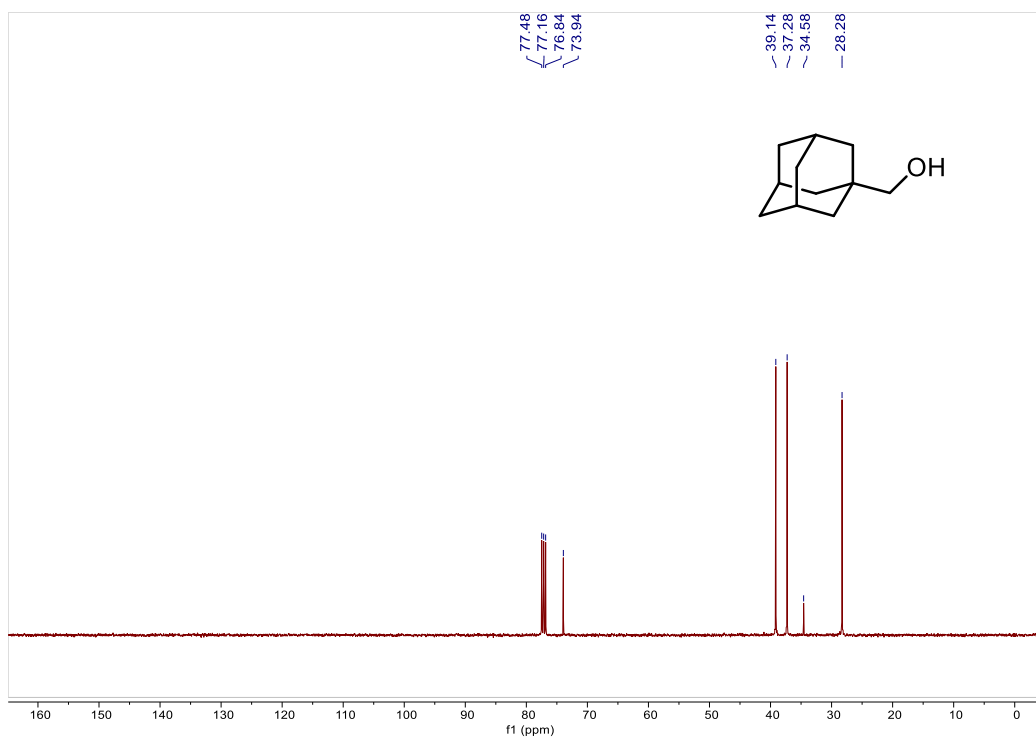

<sup>13</sup>C{<sup>1</sup>H} NMR for compound **2q**

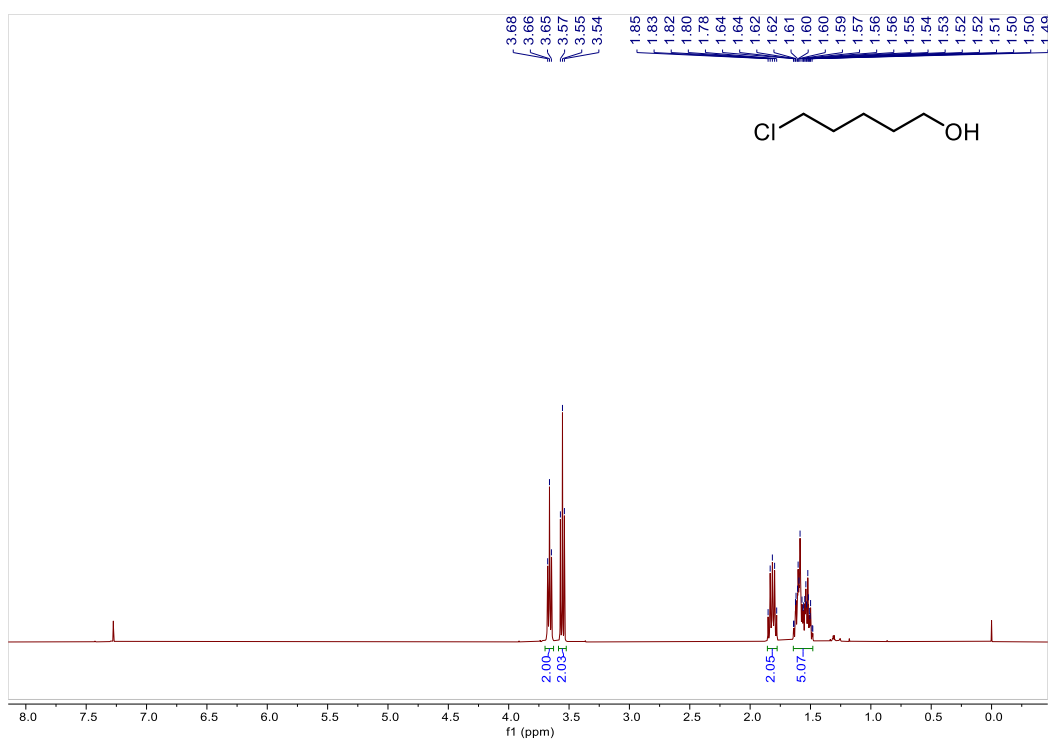

$^1\text{H}$  NMR for compound **2r**

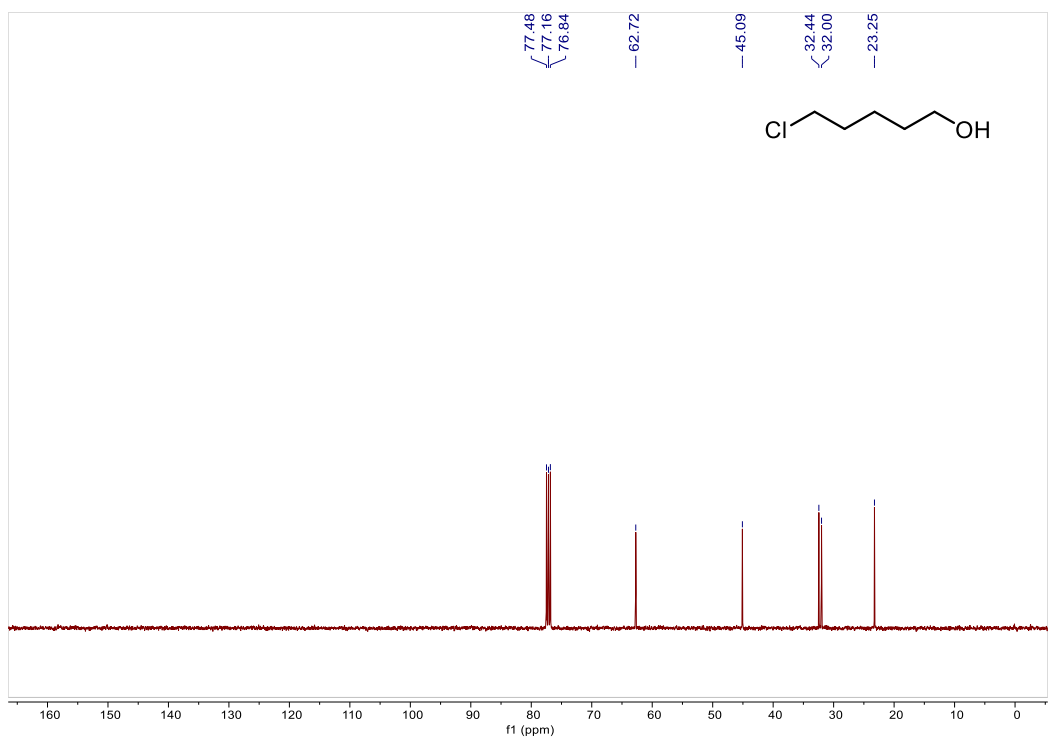

$^{13}\text{C}\{^1\text{H}\}$  NMR for compound **2r**

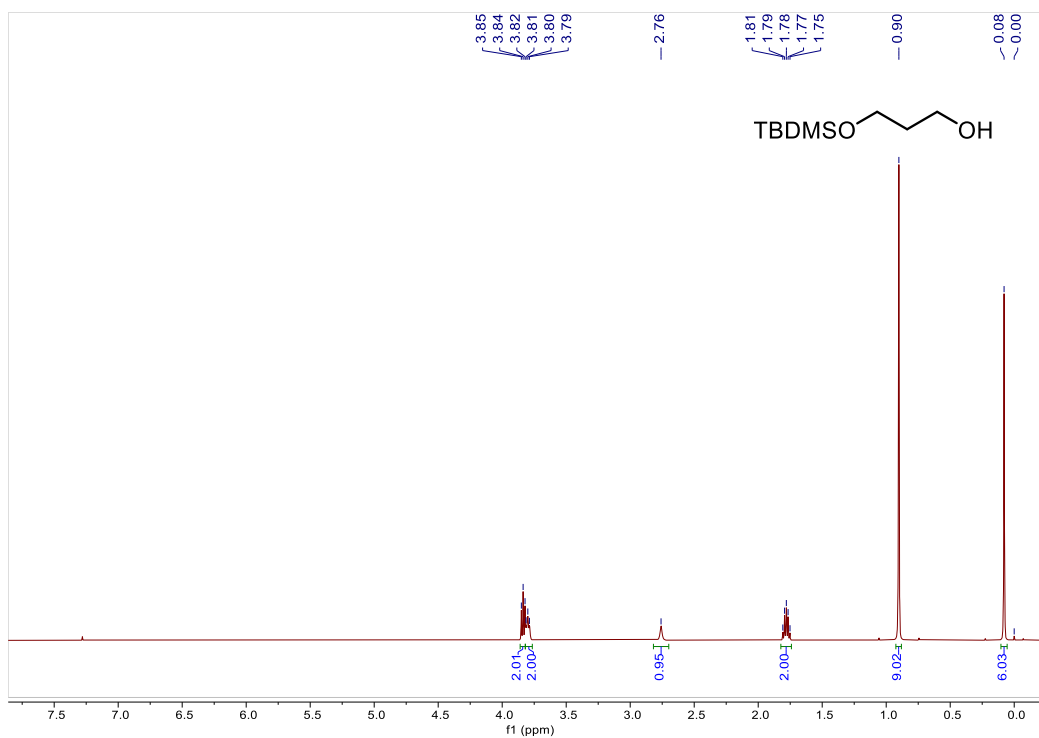<sup>1</sup>H NMR for compound **2s**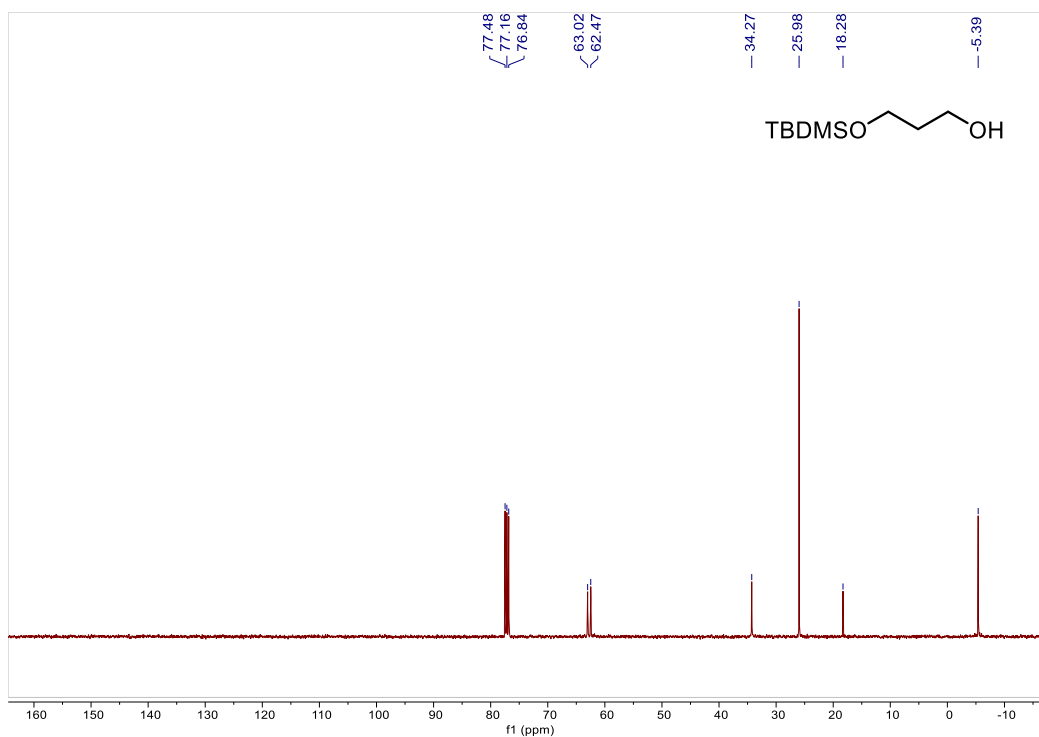 $^{13}\text{C}\{^1\text{H}\}$  NMR for compound **2s**

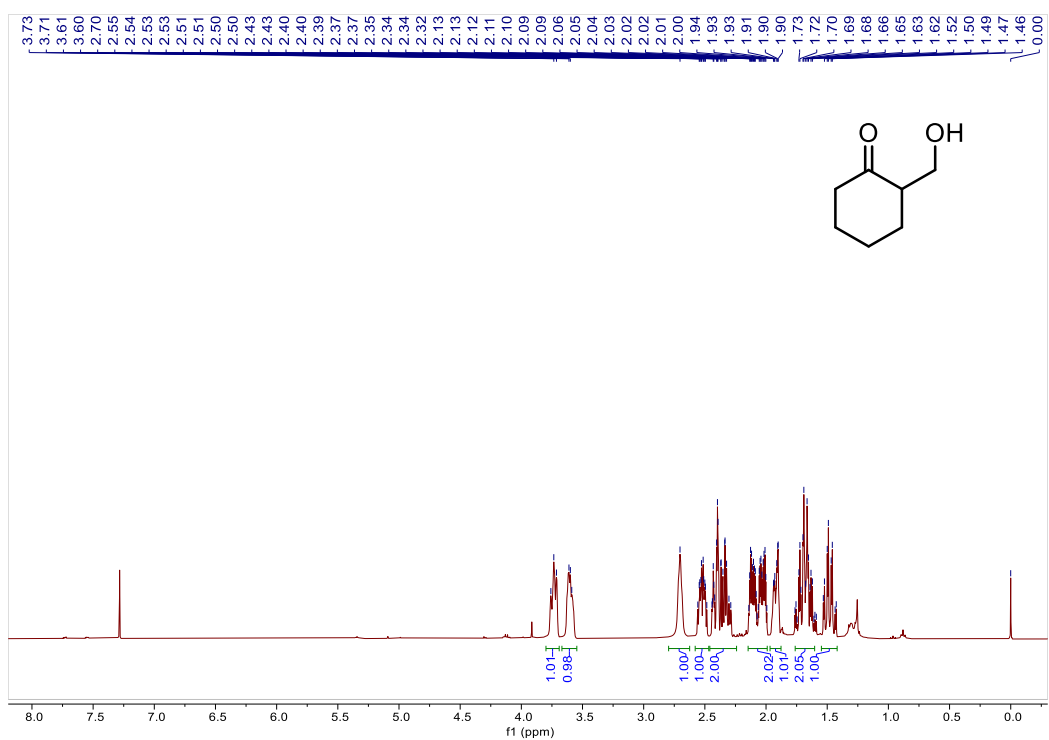

$^1\text{H}$  NMR for compound **2t**

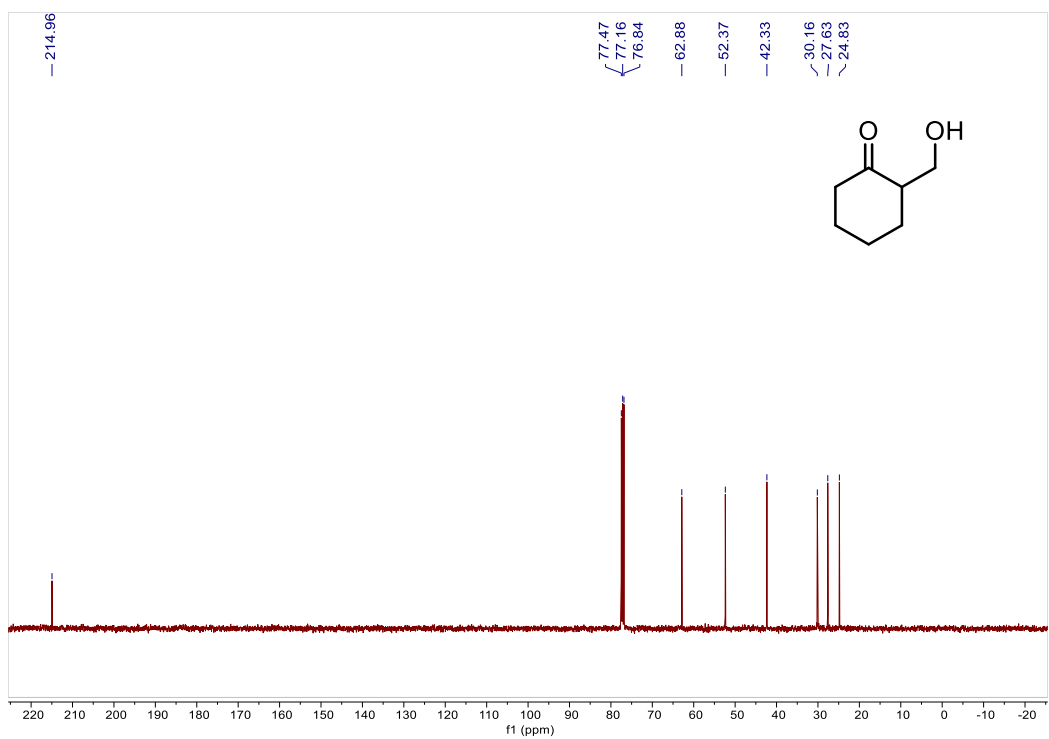

$^{13}\text{C}\{^1\text{H}\}$  NMR for compound **2t**

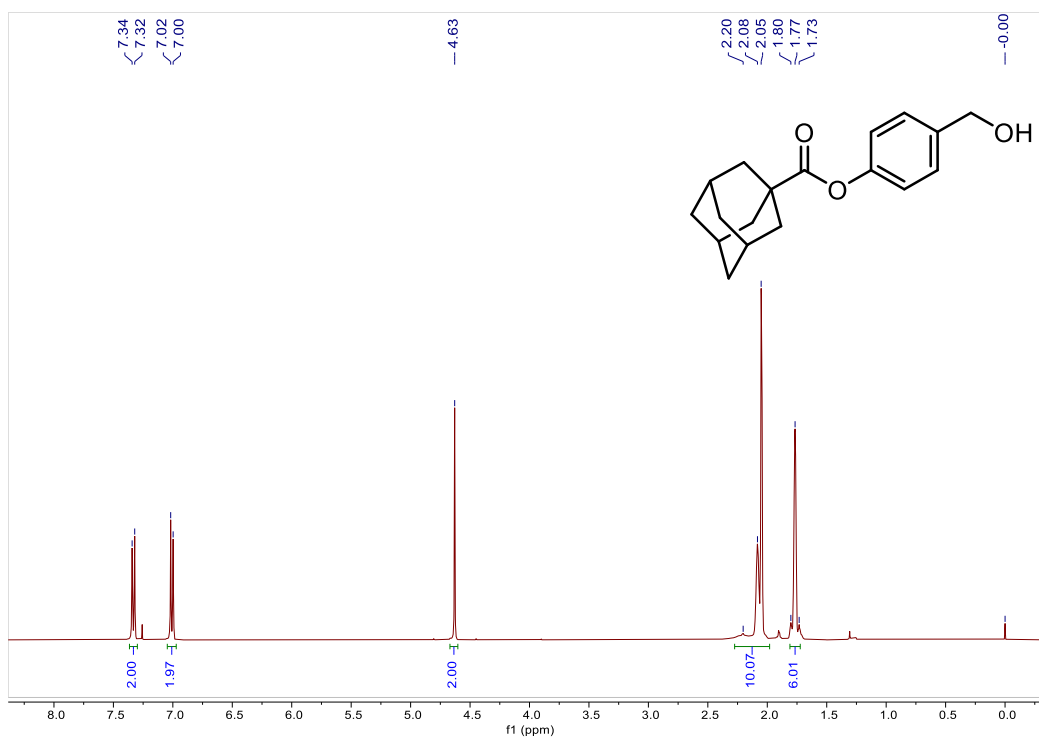

<sup>1</sup>H NMR for compound **2u**

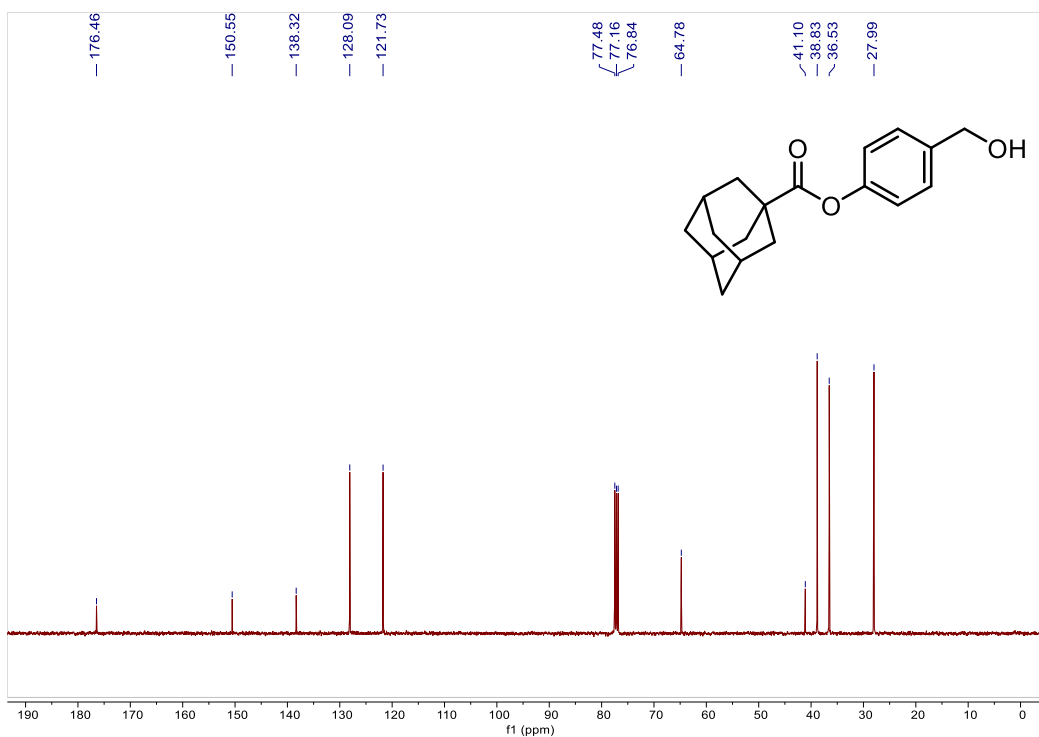

<sup>13</sup>C{<sup>1</sup>H} NMR for compound **2u**

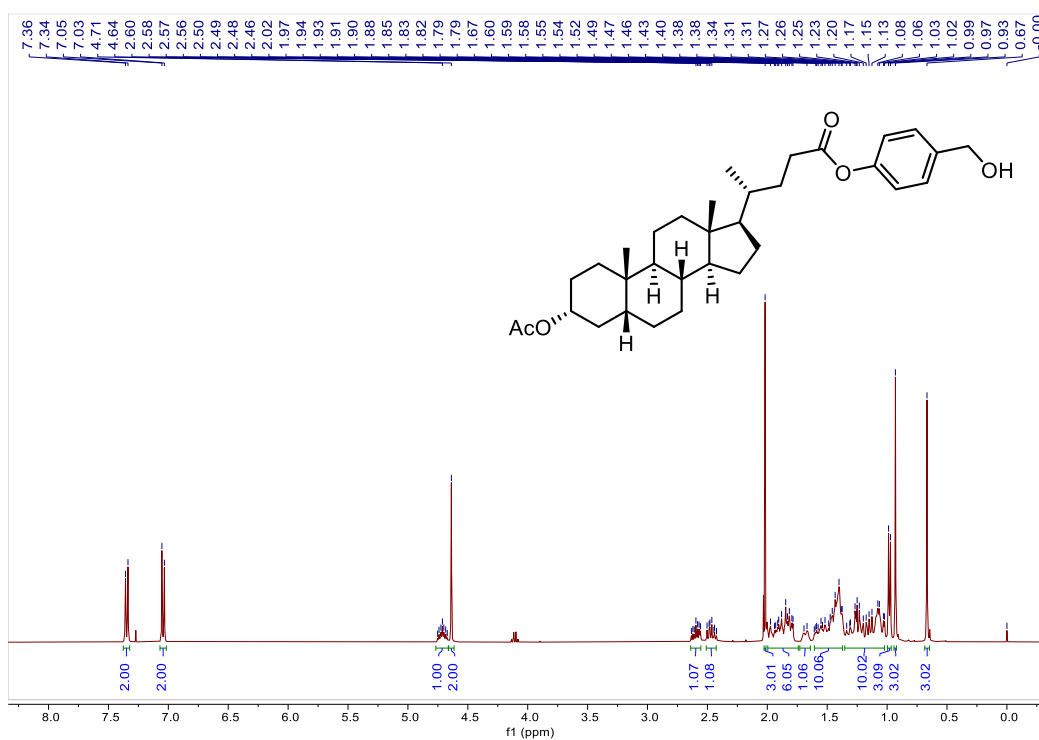

$^1\text{H}$  NMR for compound 2v

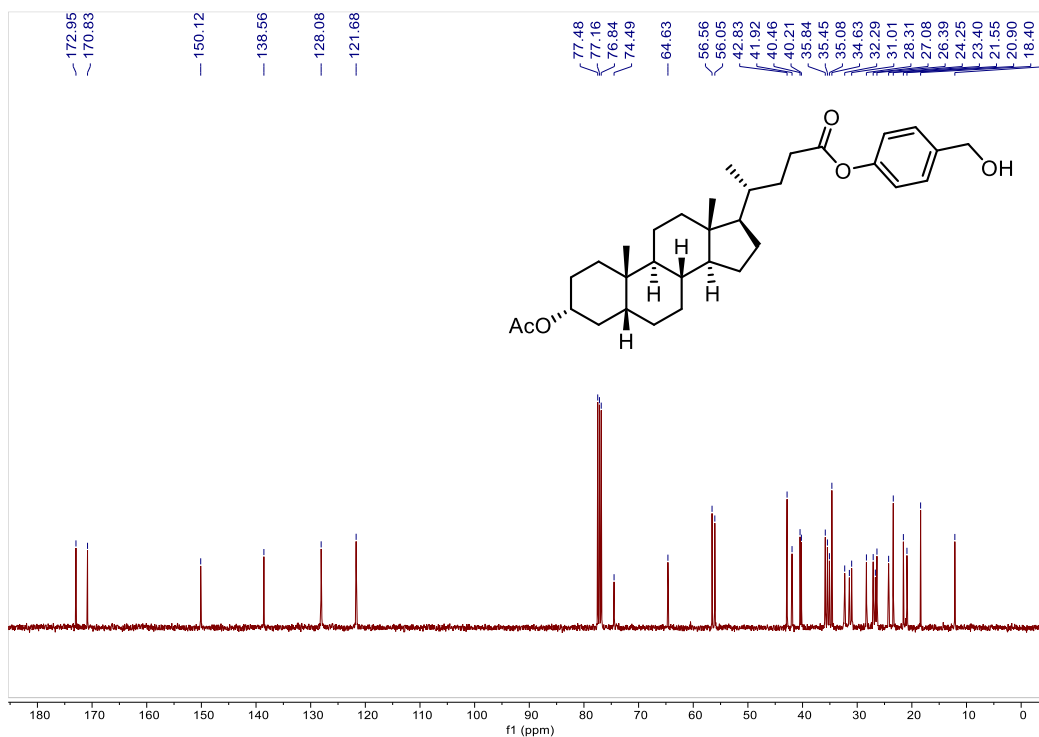

$^{13}\text{C}\{^1\text{H}\}$  NMR for compound 2v



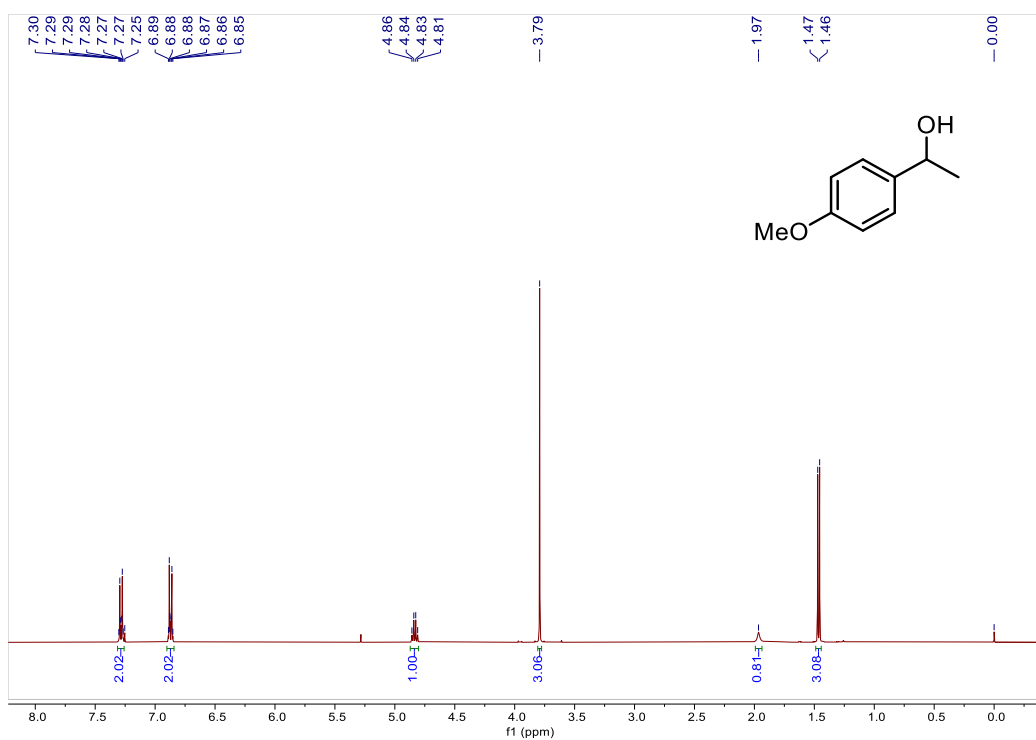

<sup>1</sup>H NMR for compound **2w**

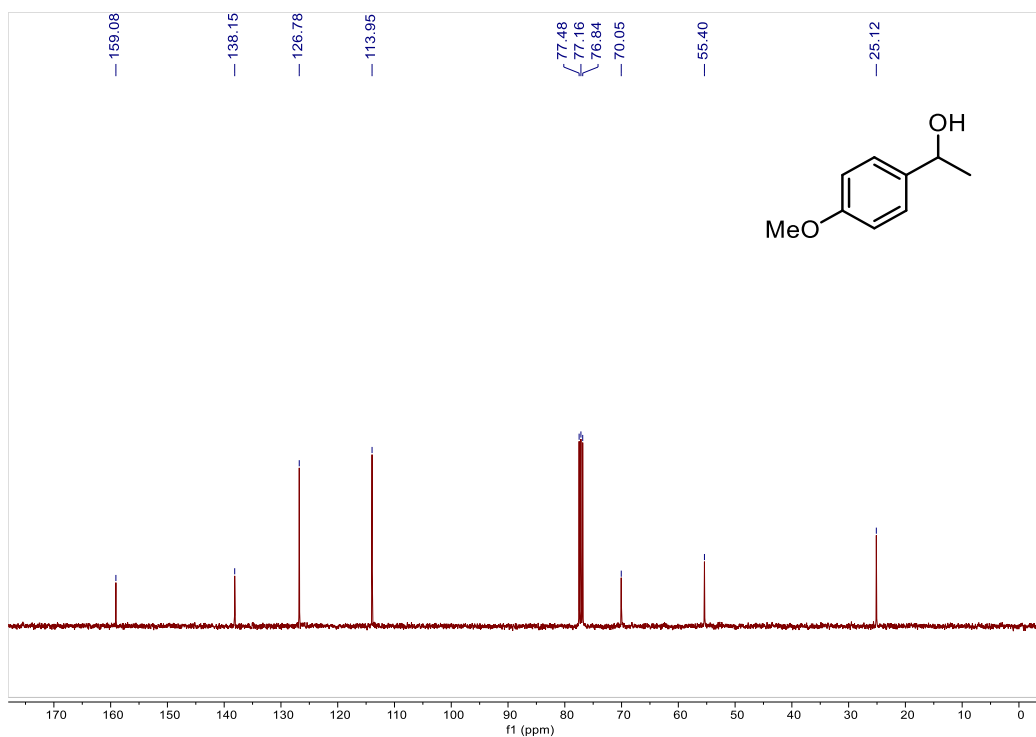

<sup>13</sup>C{<sup>1</sup>H} NMR for compound **2w**

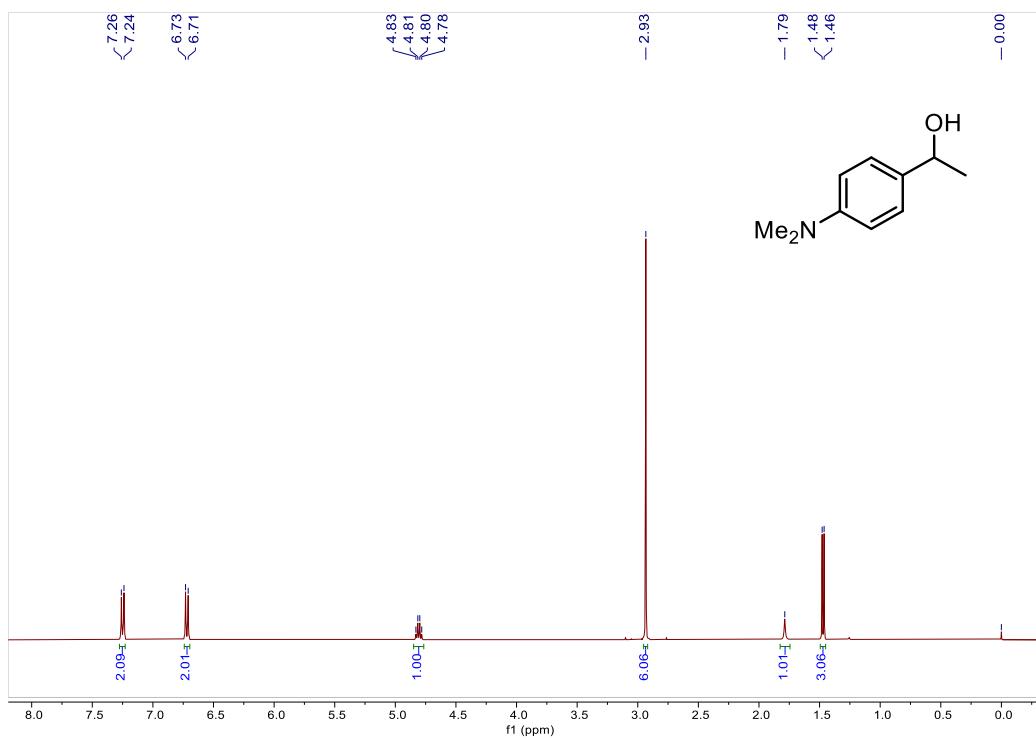

<sup>1</sup>H NMR for compound **2x**

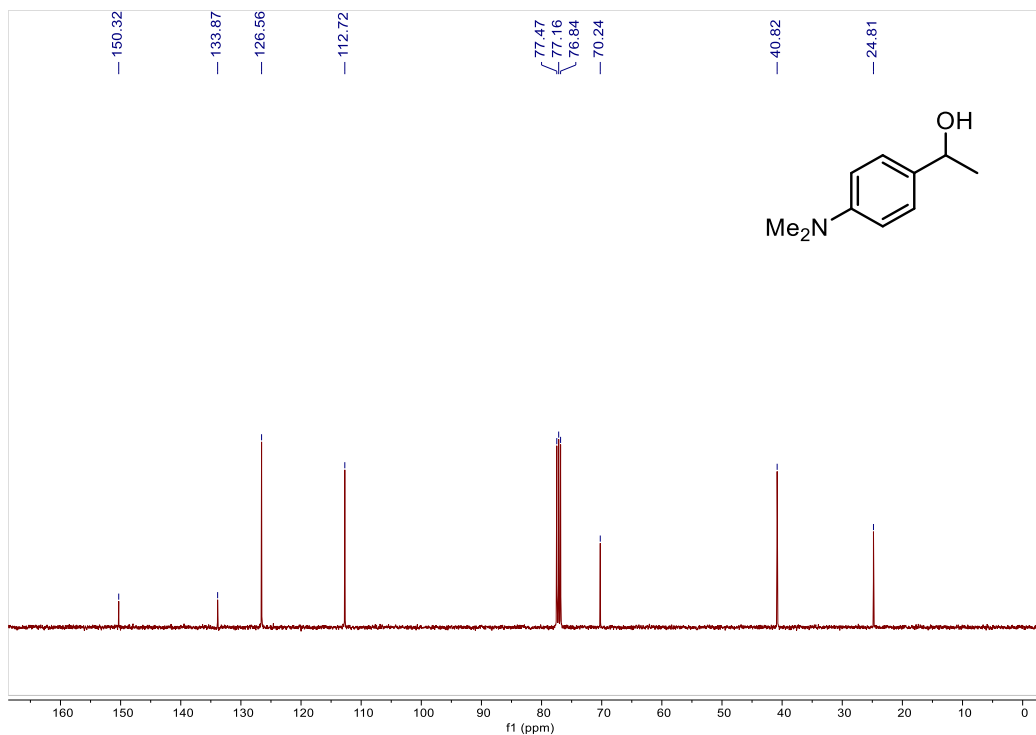

<sup>13</sup>C{<sup>1</sup>H} NMR for compound **2x**

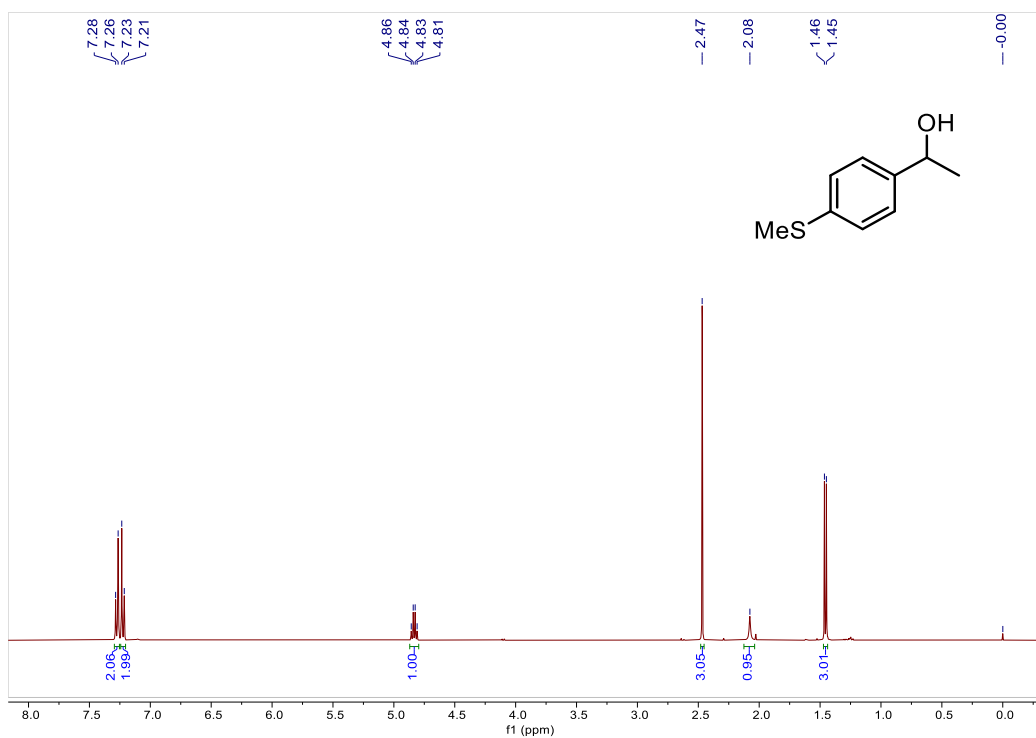

$^1\text{H}$  NMR for compound **2y**

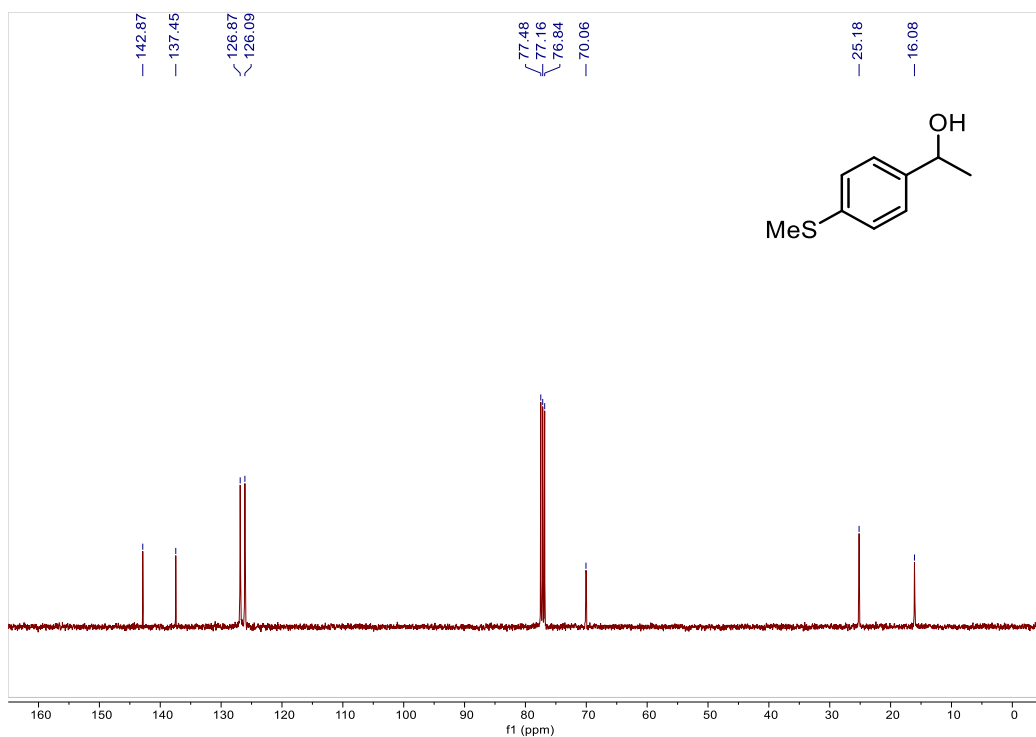

$^{13}\text{C}\{^1\text{H}\}$  NMR for compound **2y**

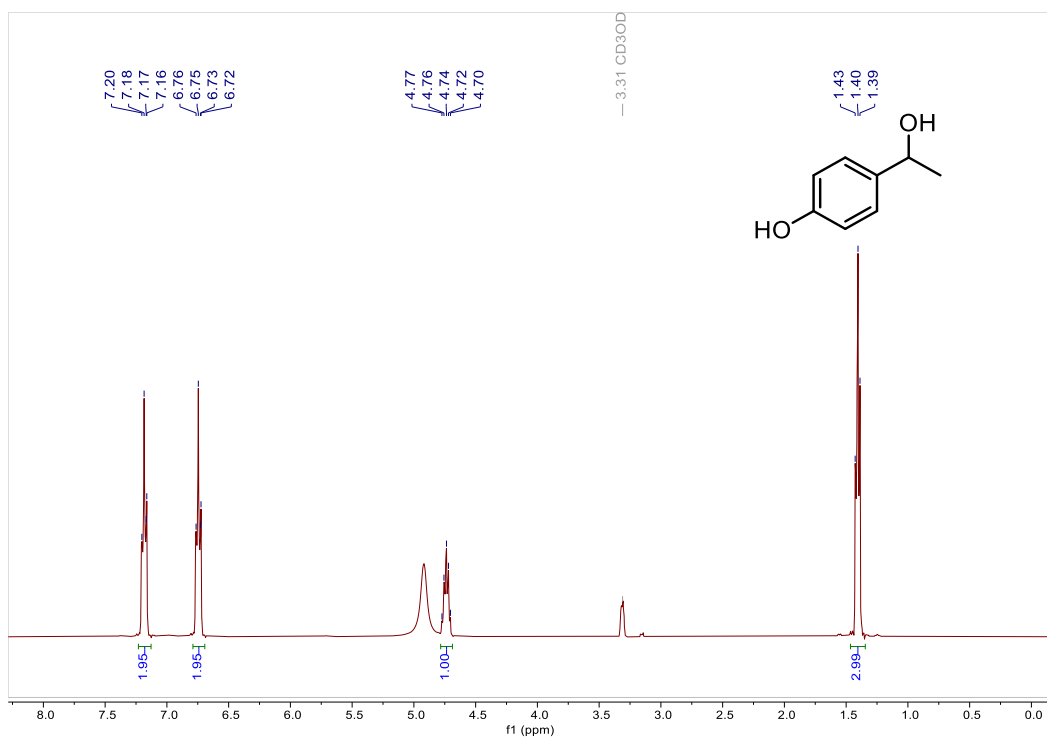

<sup>1</sup>H NMR for compound **2z**

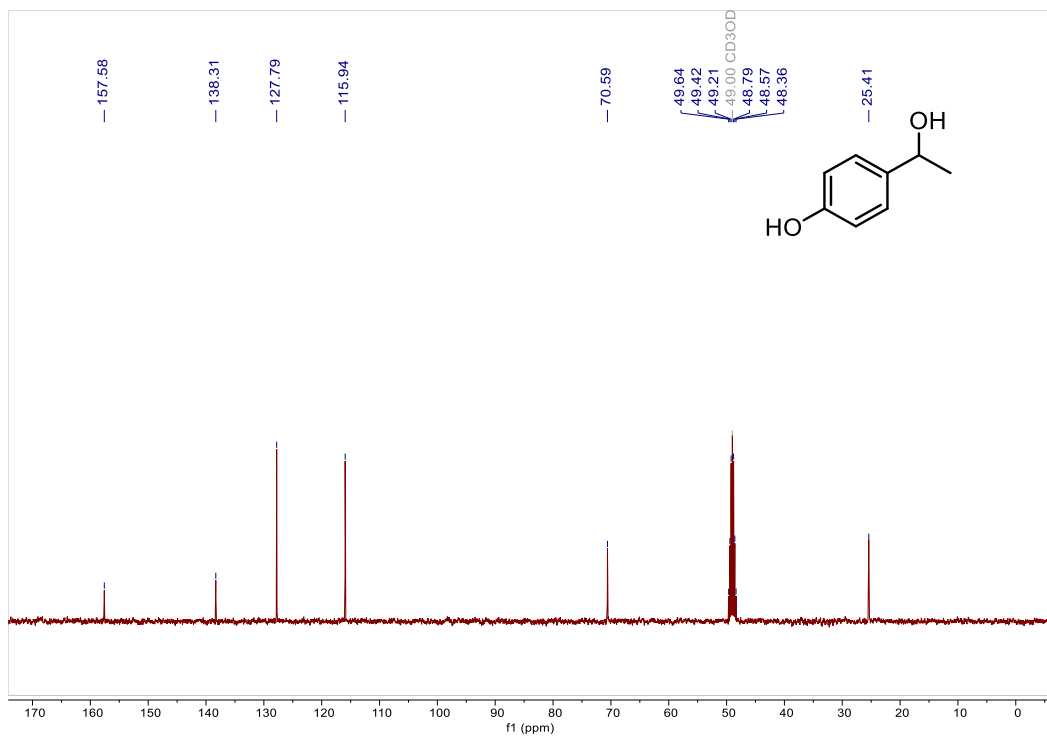

<sup>13</sup>C{<sup>1</sup>H} NMR for compound **2z**

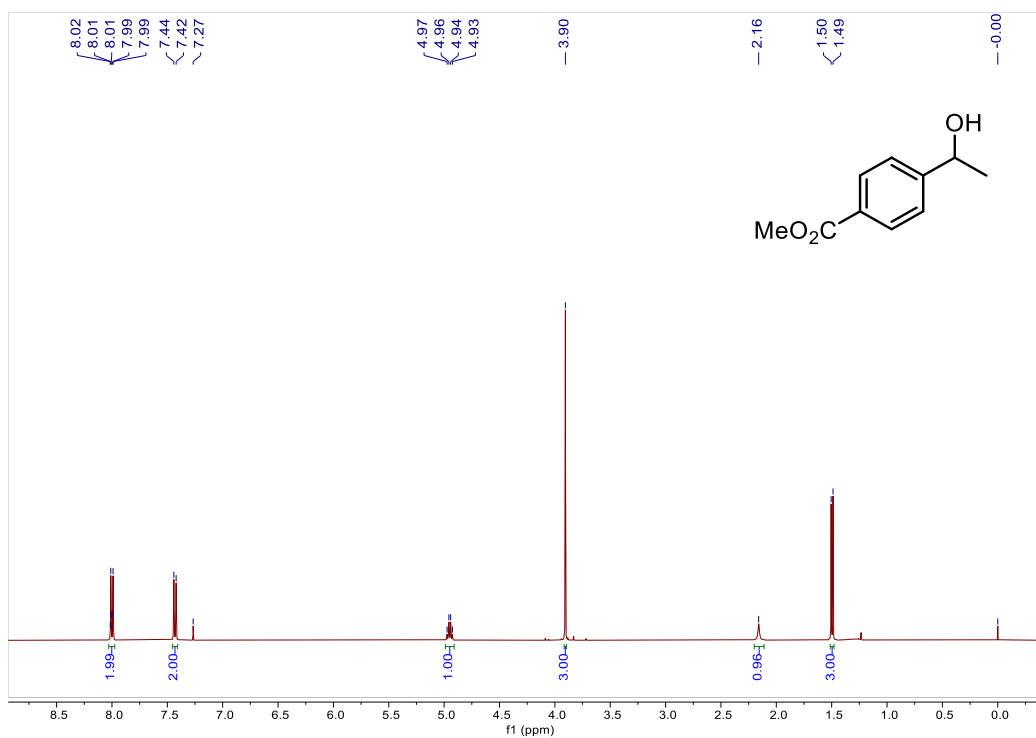

$^1\text{H}$  NMR for compound **2aa**

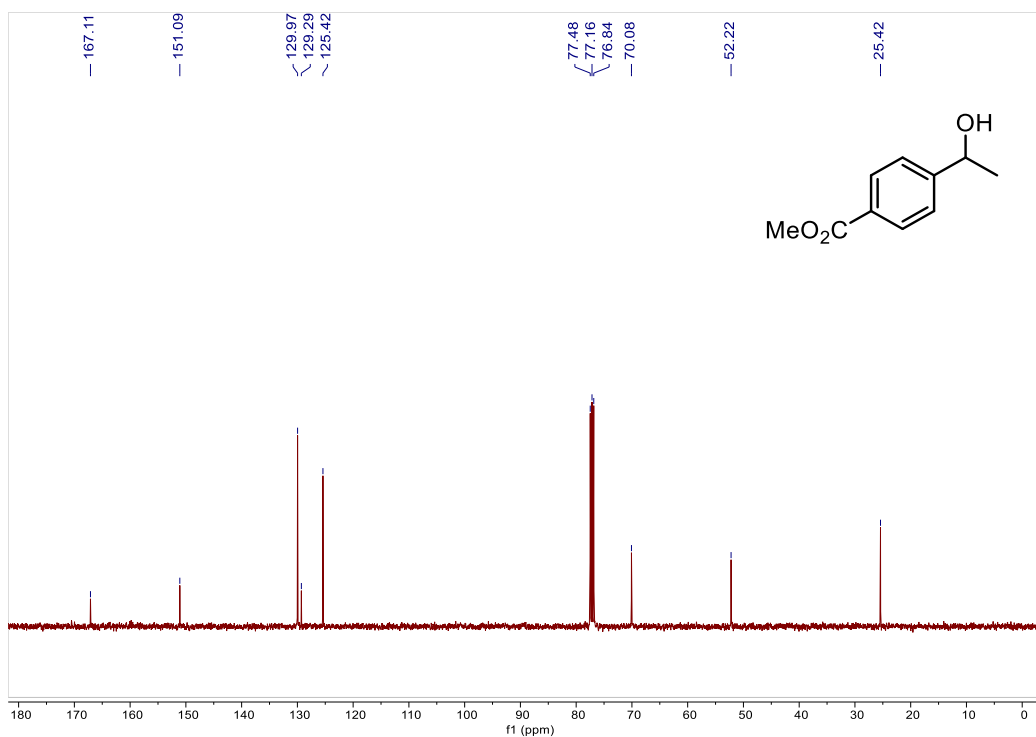

$^{13}\text{C}\{^1\text{H}\}$  NMR for compound **2aa**

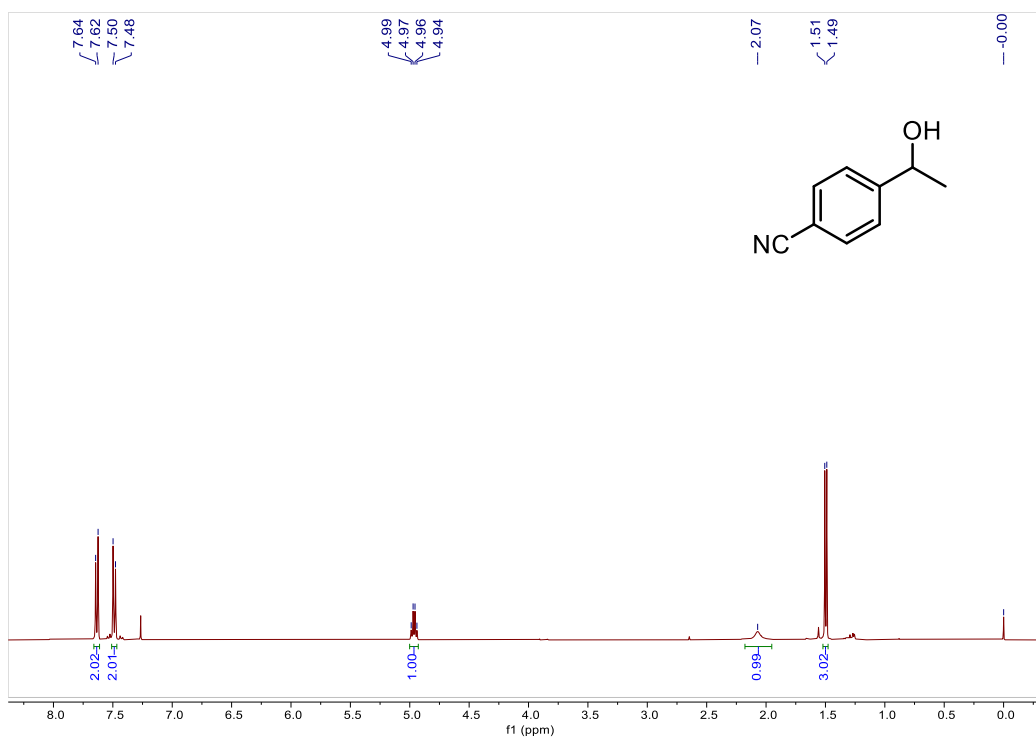

<sup>1</sup>H NMR for compound **2ab**

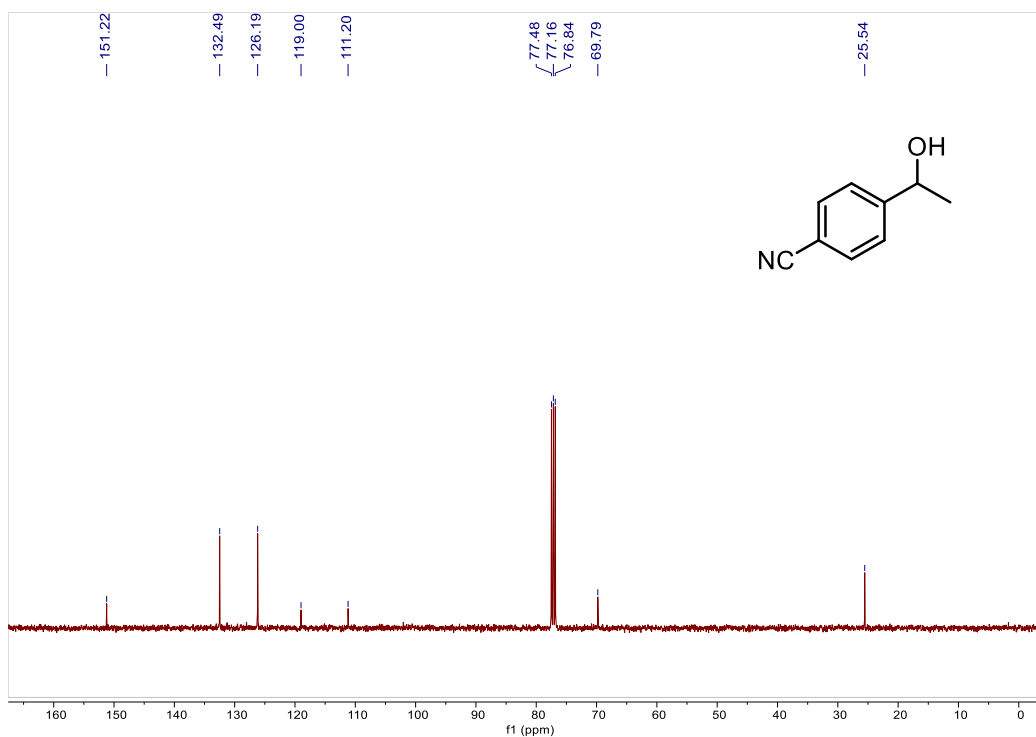

<sup>13</sup>C{<sup>1</sup>H} NMR for compound **2ab**

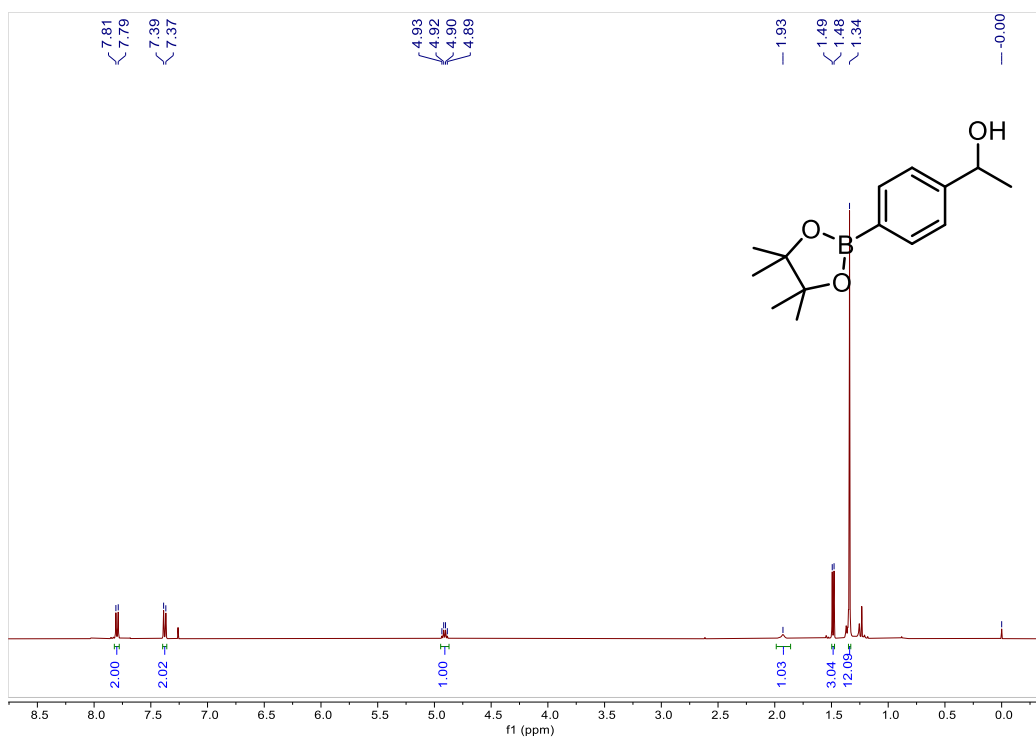

<sup>1</sup>H NMR for compound **2ac**

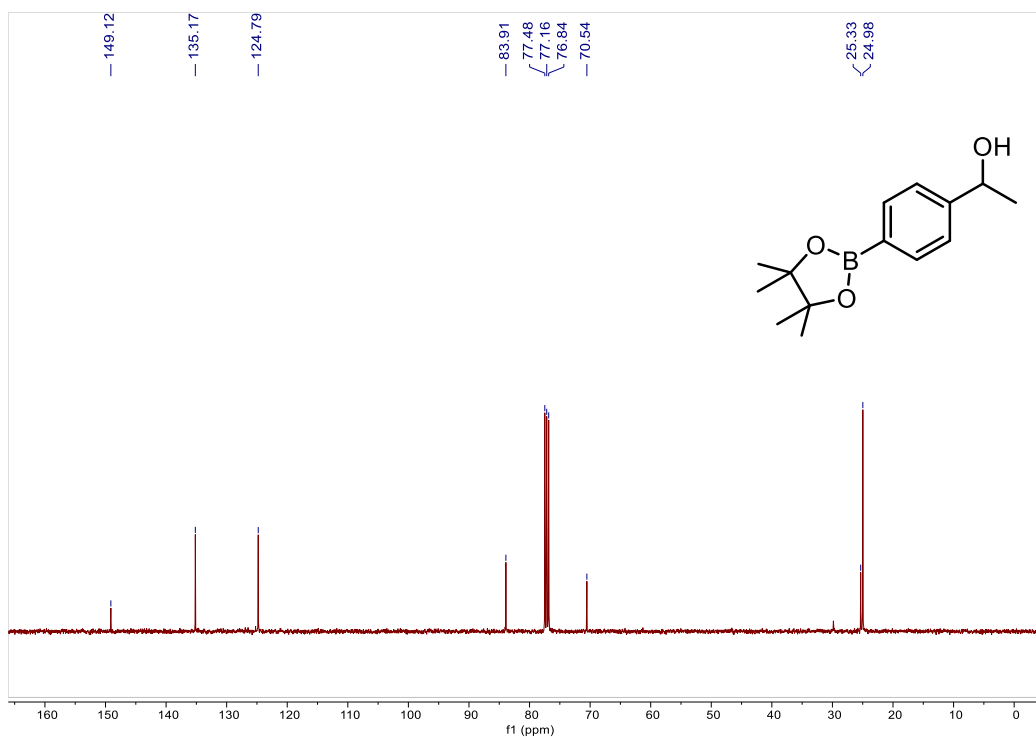

<sup>13</sup>C{<sup>1</sup>H} NMR for compound **2ac**

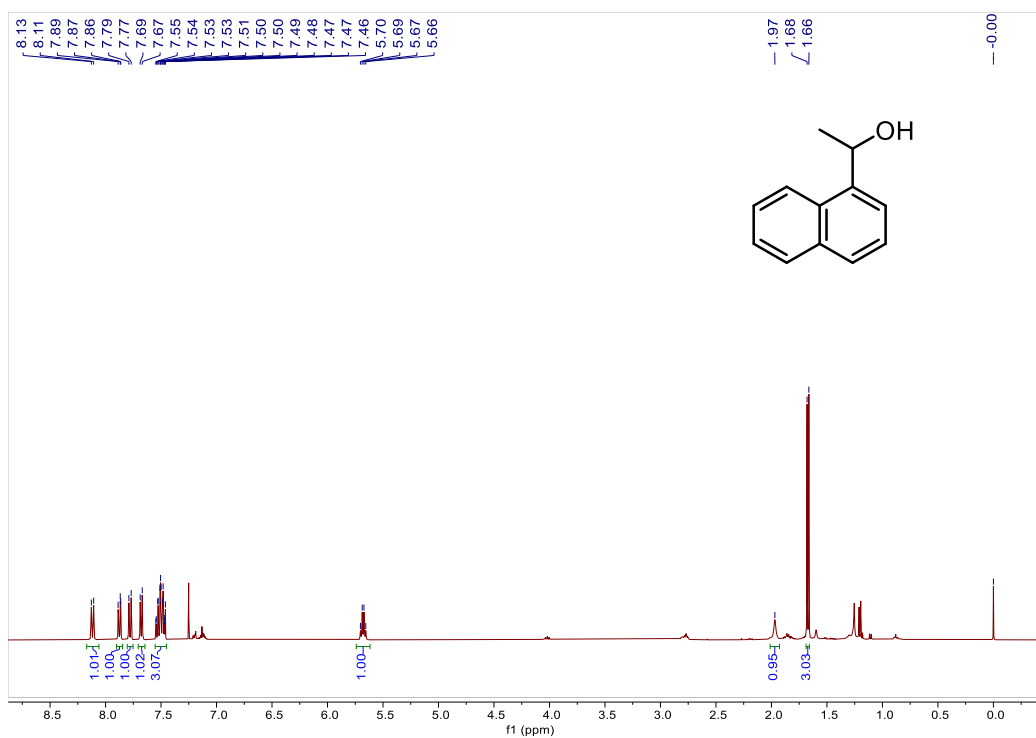

<sup>1</sup>H NMR for compound **2ad**

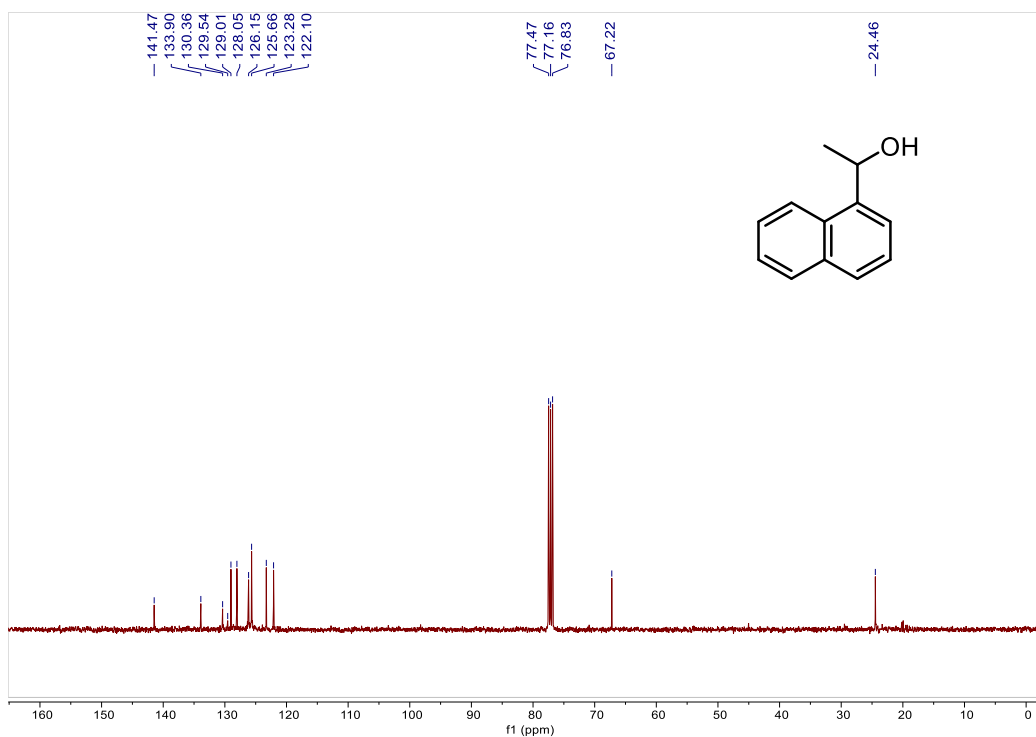

<sup>13</sup>C{<sup>1</sup>H} NMR for compound **2ad**



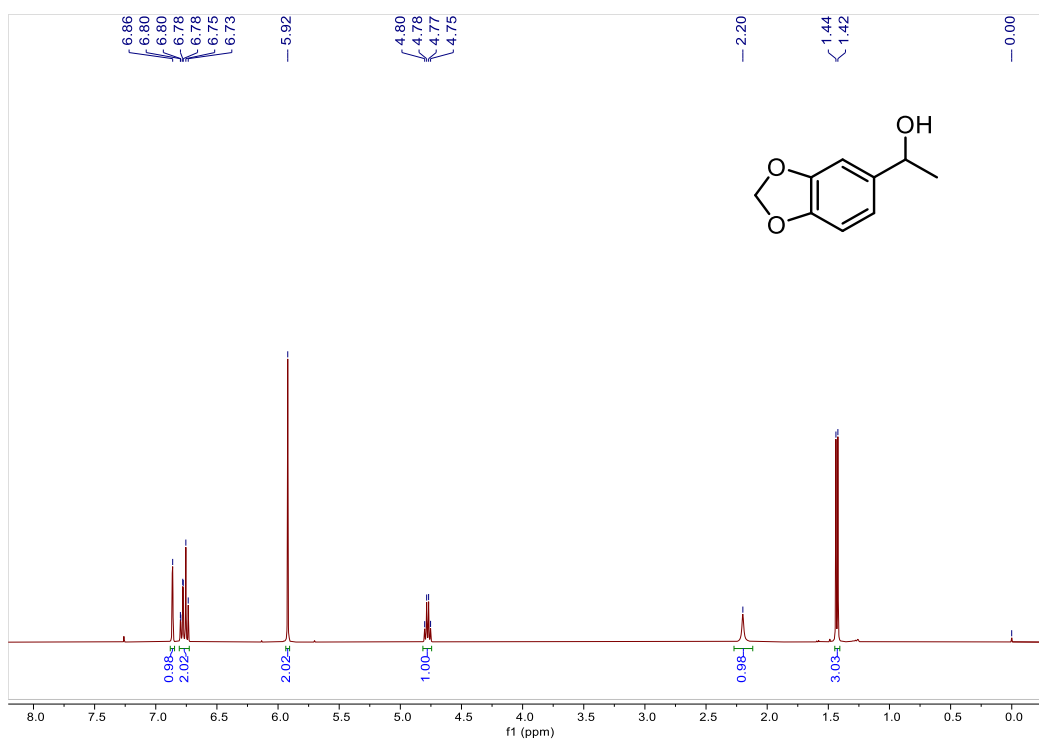

$^1\text{H}$  NMR for compound **2ae**

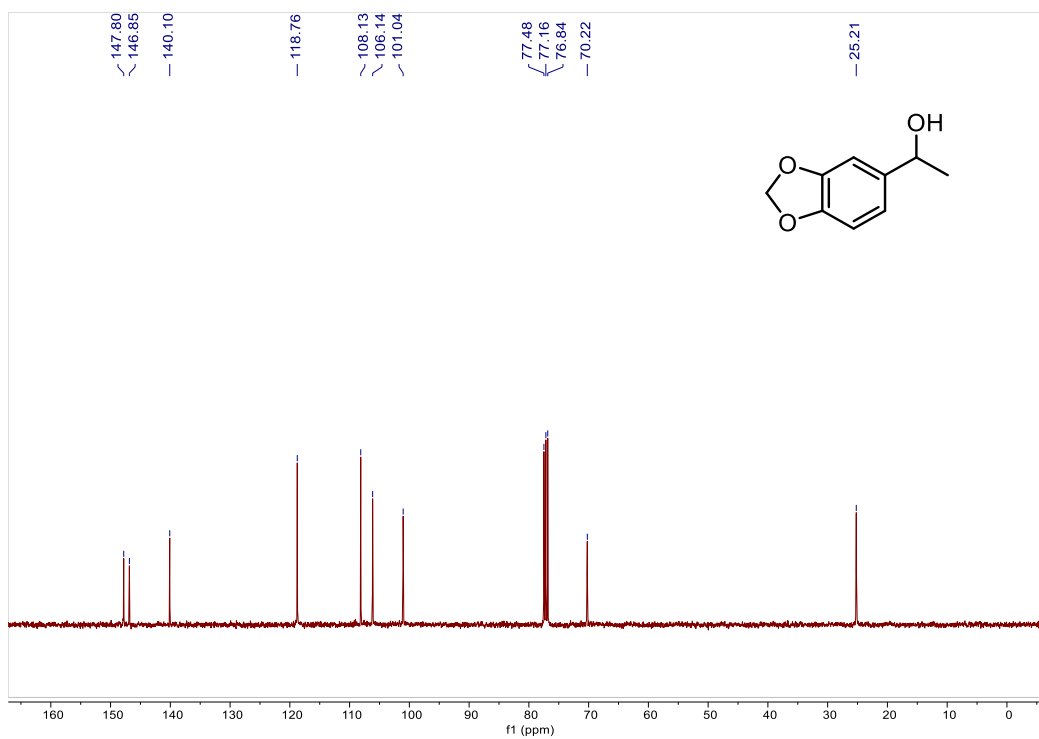

$^{13}\text{C}\{^1\text{H}\}$  NMR for compound **2ae**

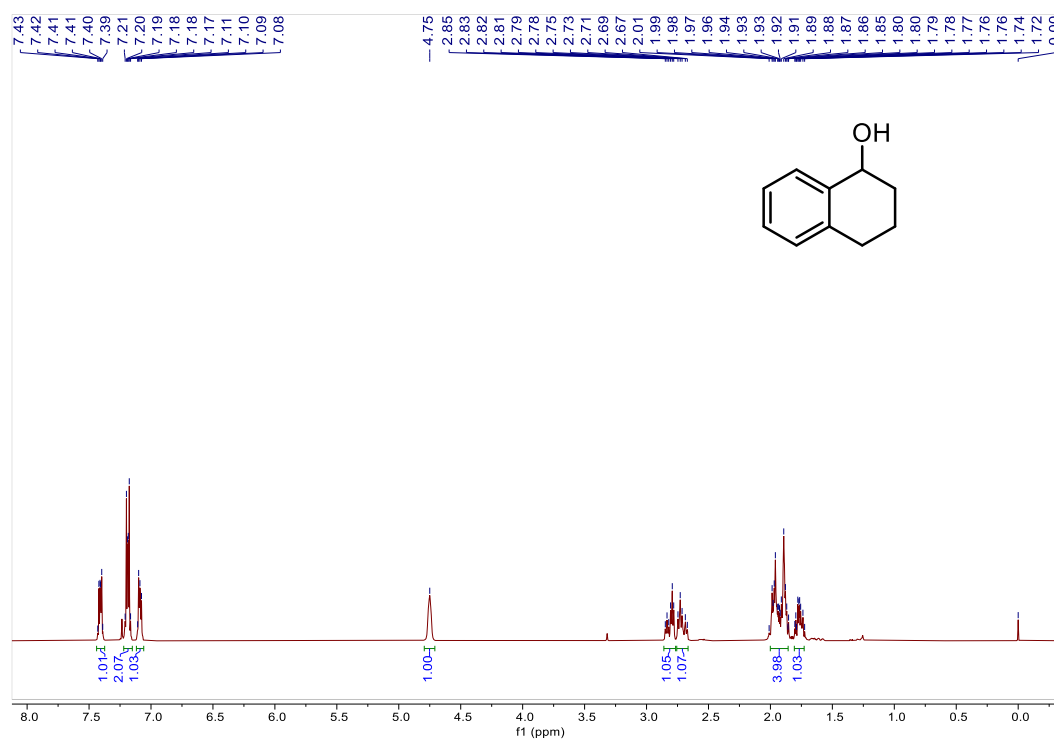

<sup>1</sup>H NMR for compound **2af**

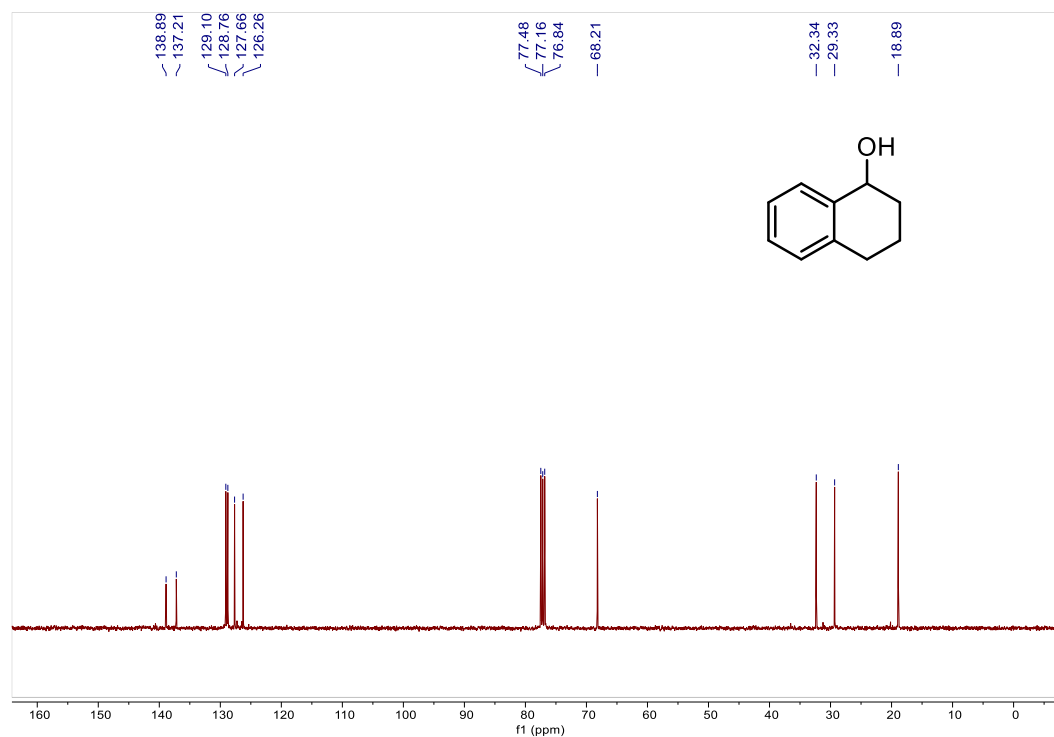

<sup>13</sup>C{<sup>1</sup>H} NMR for compound **2af**

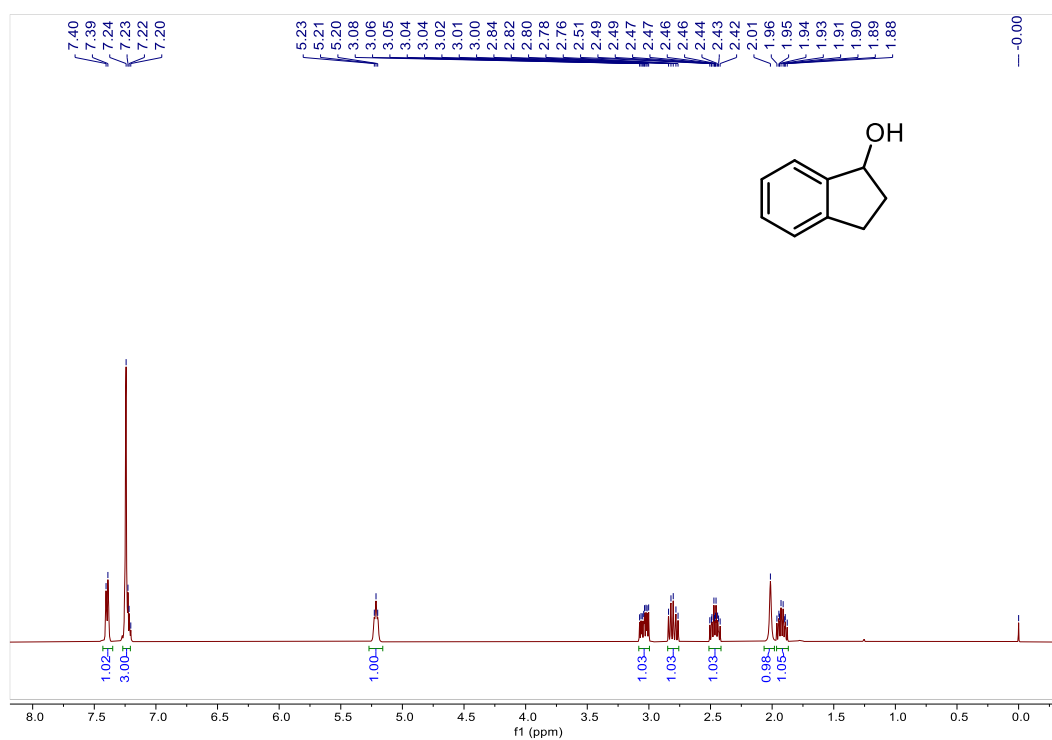

<sup>1</sup>H NMR for compound **2ag**

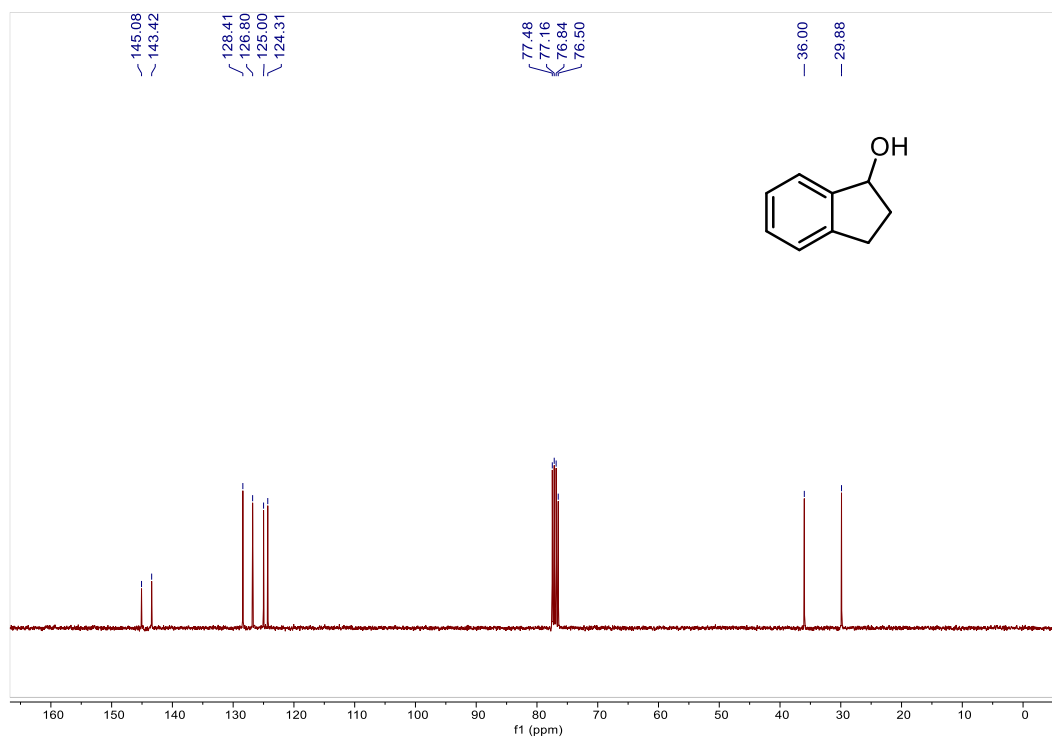

<sup>13</sup>C{<sup>1</sup>H} NMR for compound **2ag**

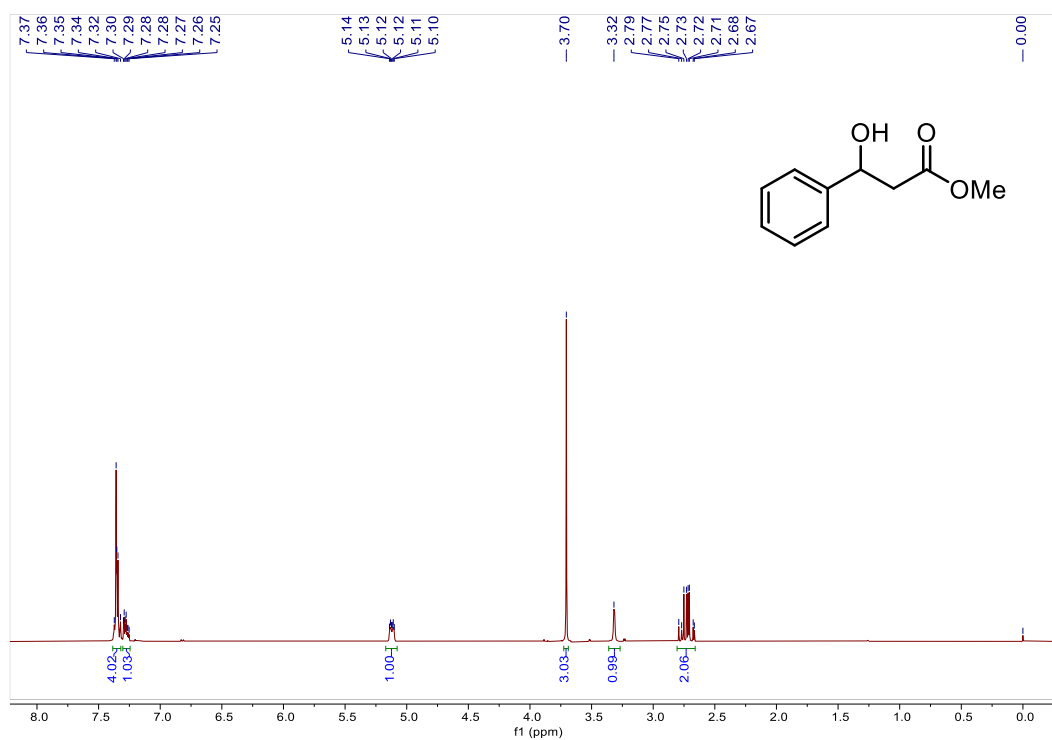

$^1\text{H}$  NMR for compound **2ah**

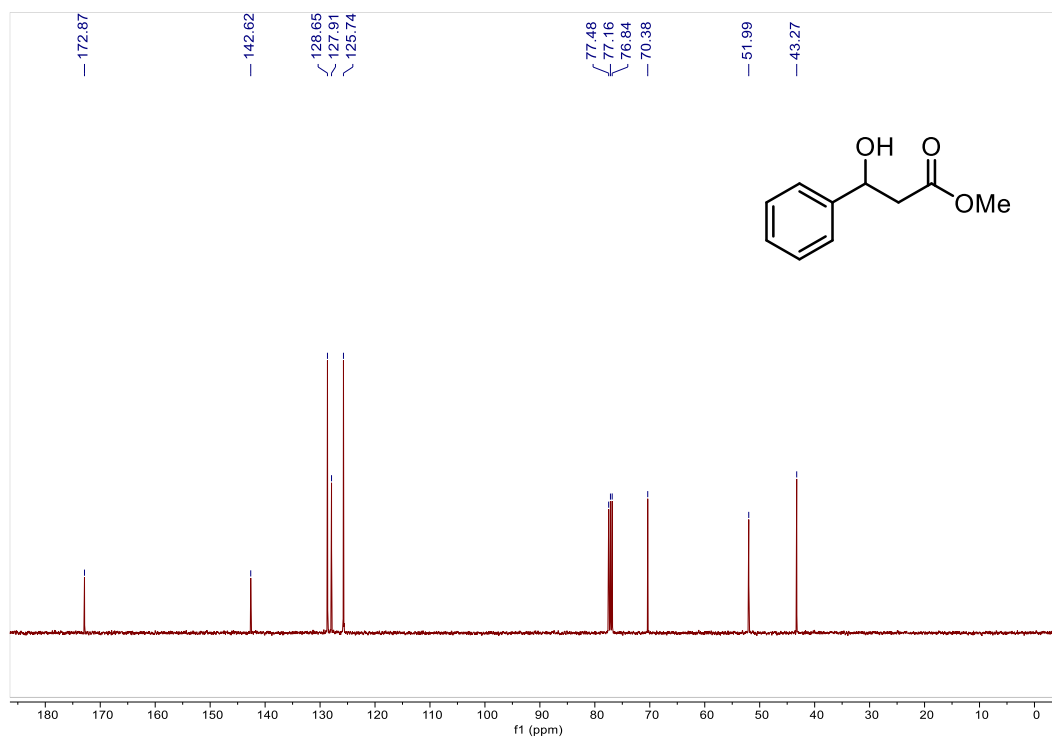

$^{13}\text{C}\{^1\text{H}\}$  NMR for compound **2ah**

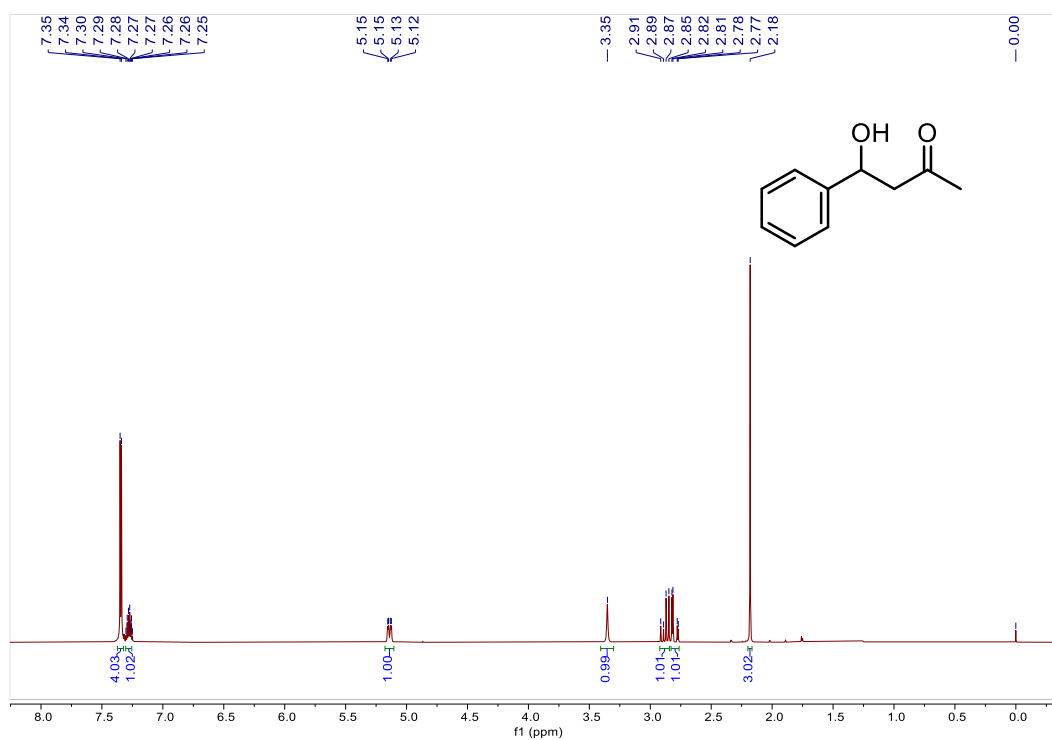

<sup>1</sup>H NMR for compound **2ai**

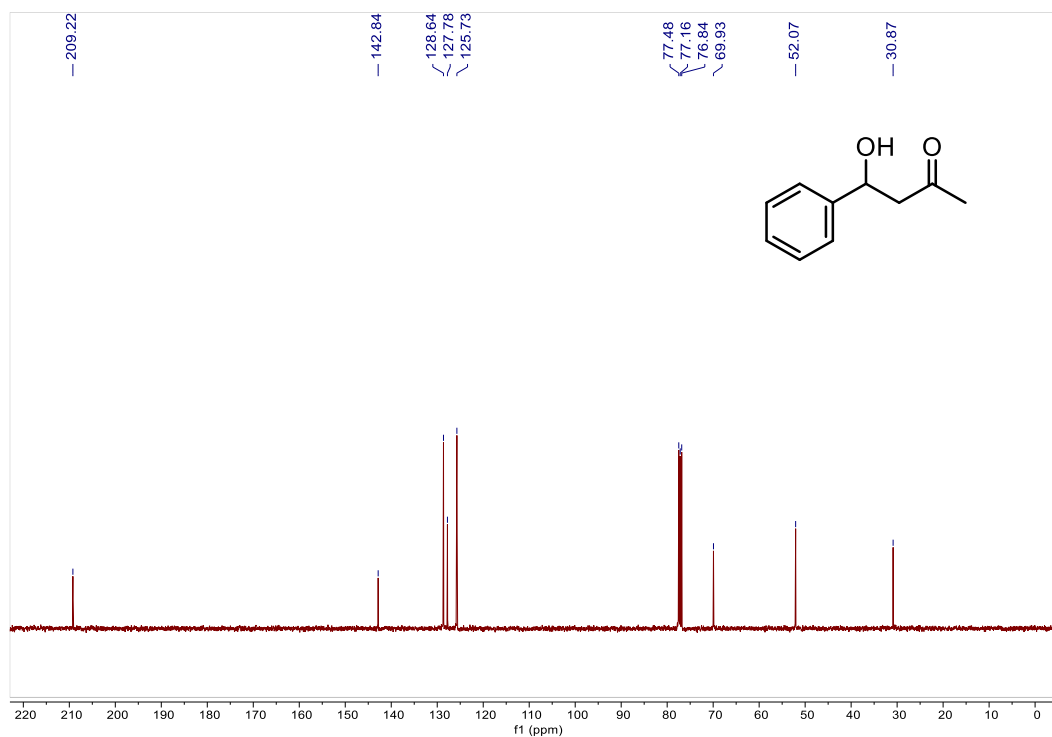

<sup>13</sup>C{<sup>1</sup>H} NMR for compound **2ai**

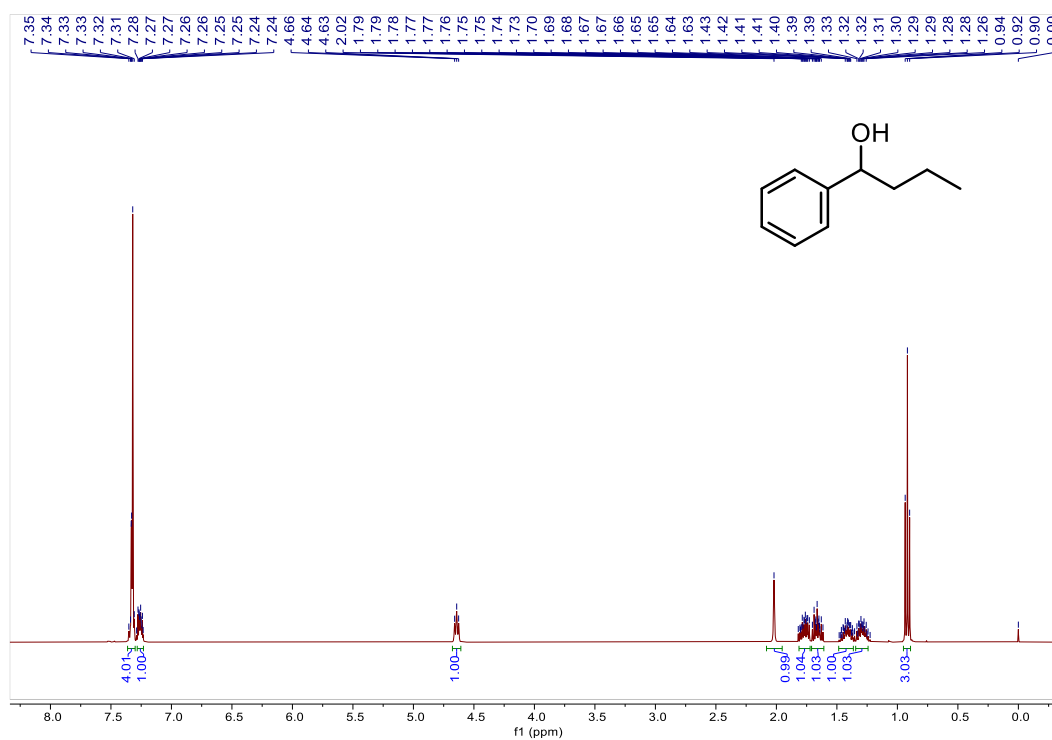

<sup>1</sup>H NMR for compound **2aj**

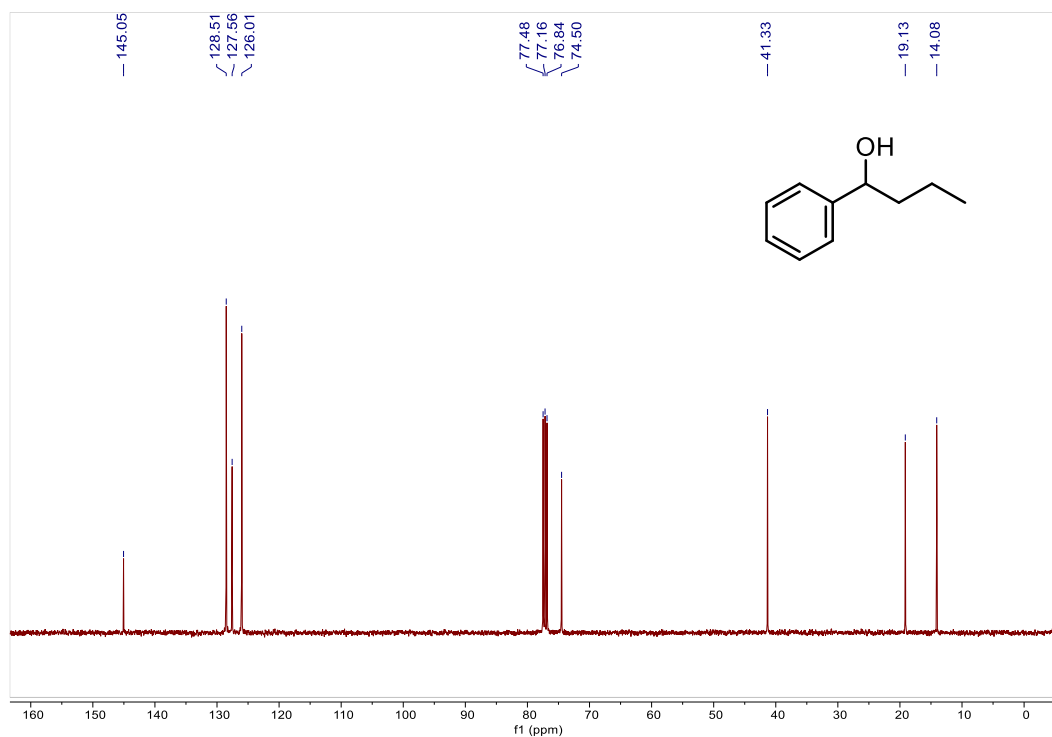

<sup>13</sup>C{<sup>1</sup>H} NMR for compound **2aj**

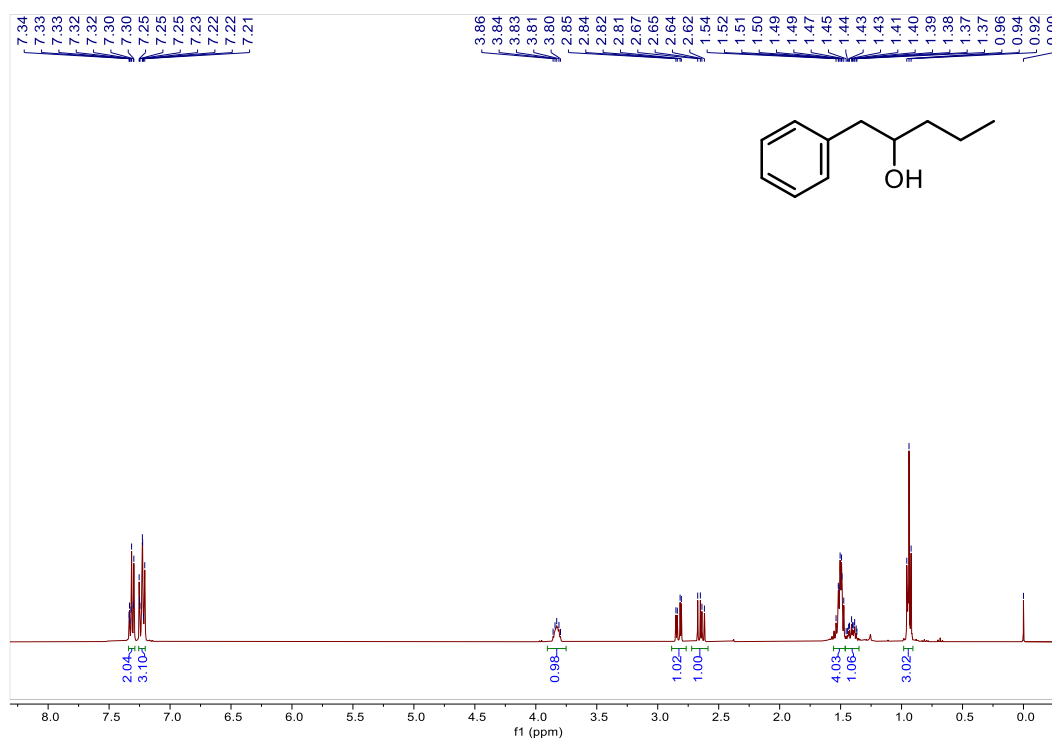

<sup>1</sup>H NMR for compound **2ak**

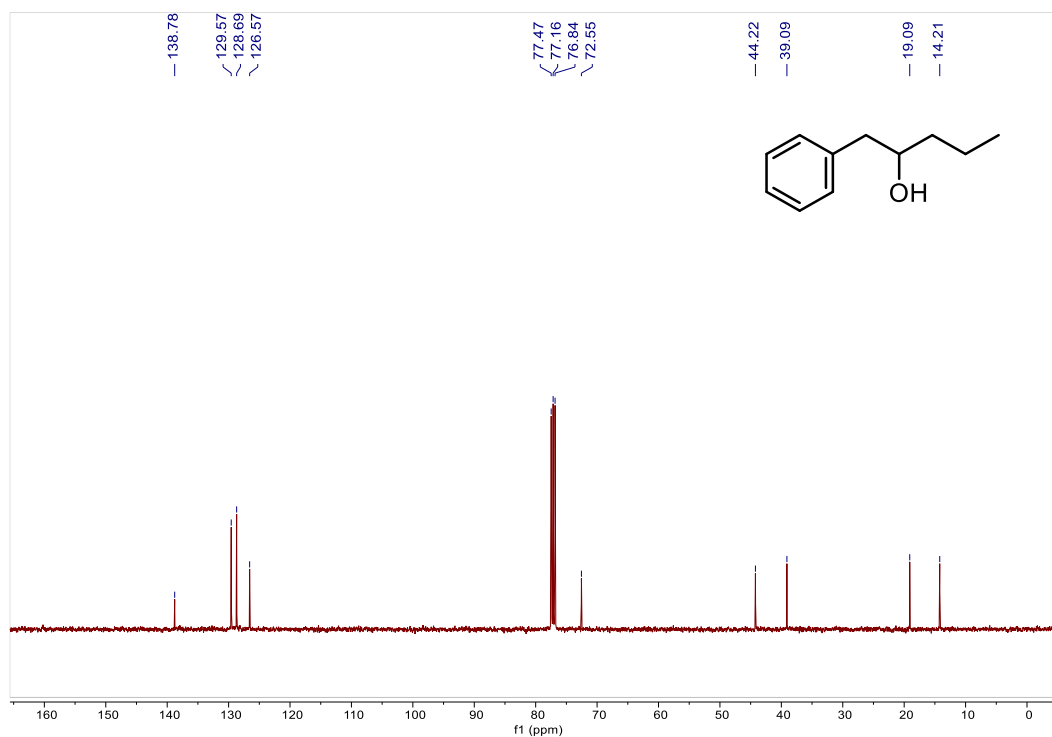

<sup>13</sup>C{<sup>1</sup>H} NMR for compound **2ak**

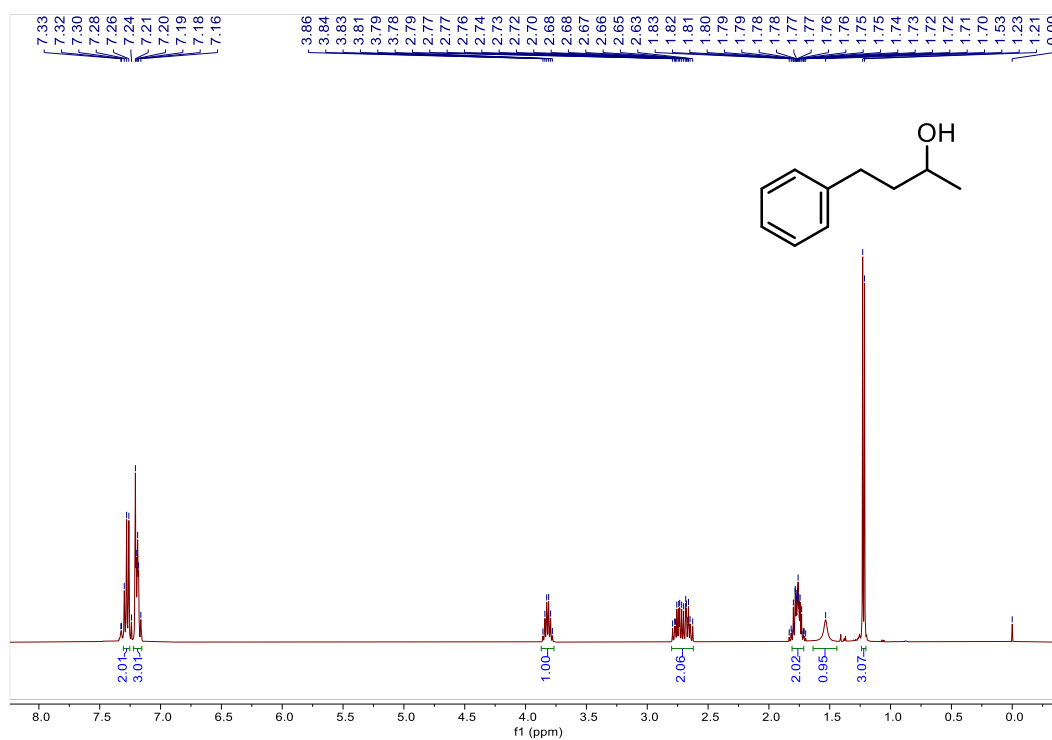

<sup>1</sup>H NMR for compound **2al**

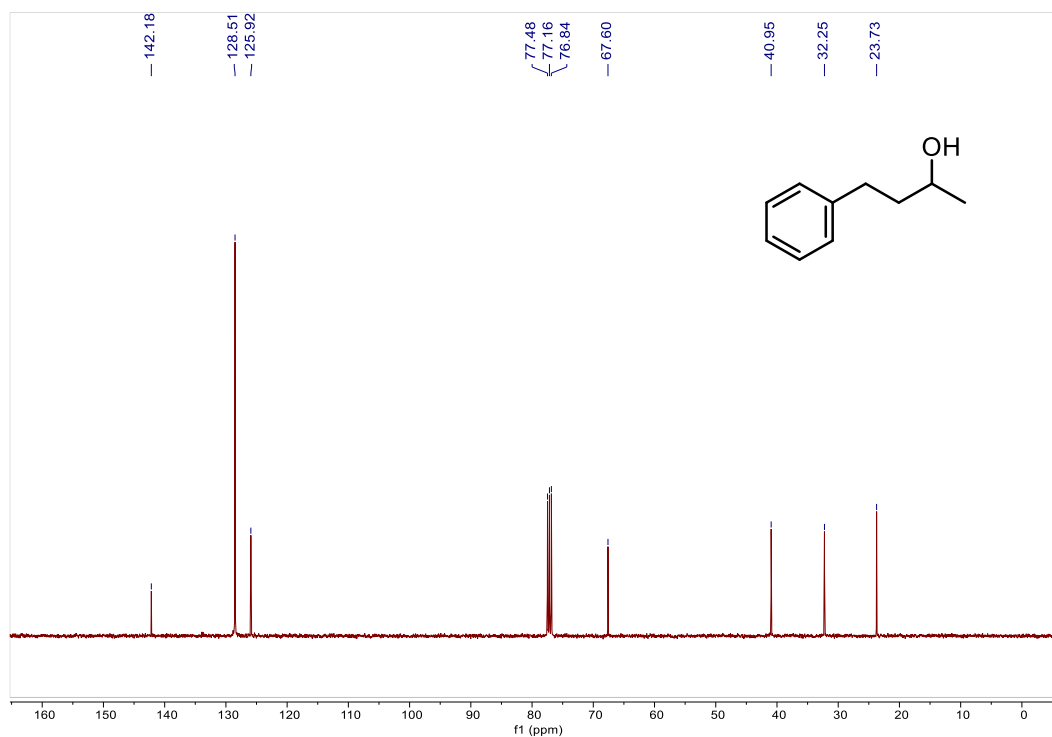

<sup>13</sup>C{<sup>1</sup>H} NMR for compound **2al**



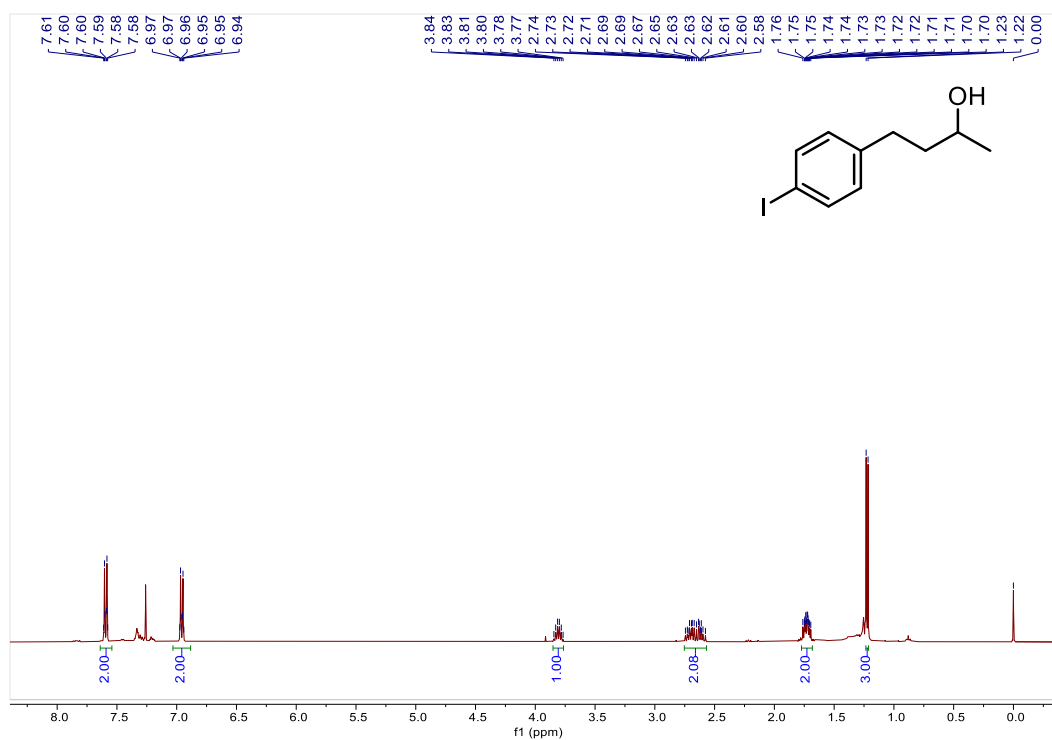

<sup>1</sup>H NMR for compound **2am**

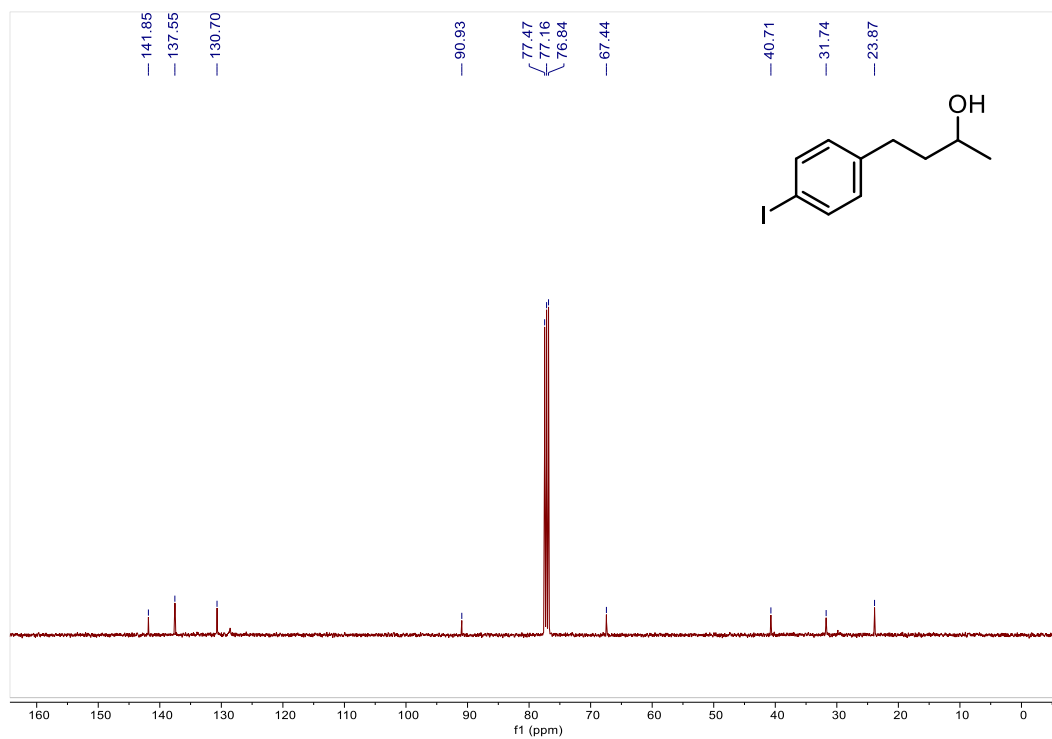

<sup>13</sup>C{<sup>1</sup>H} NMR for compound **2am**

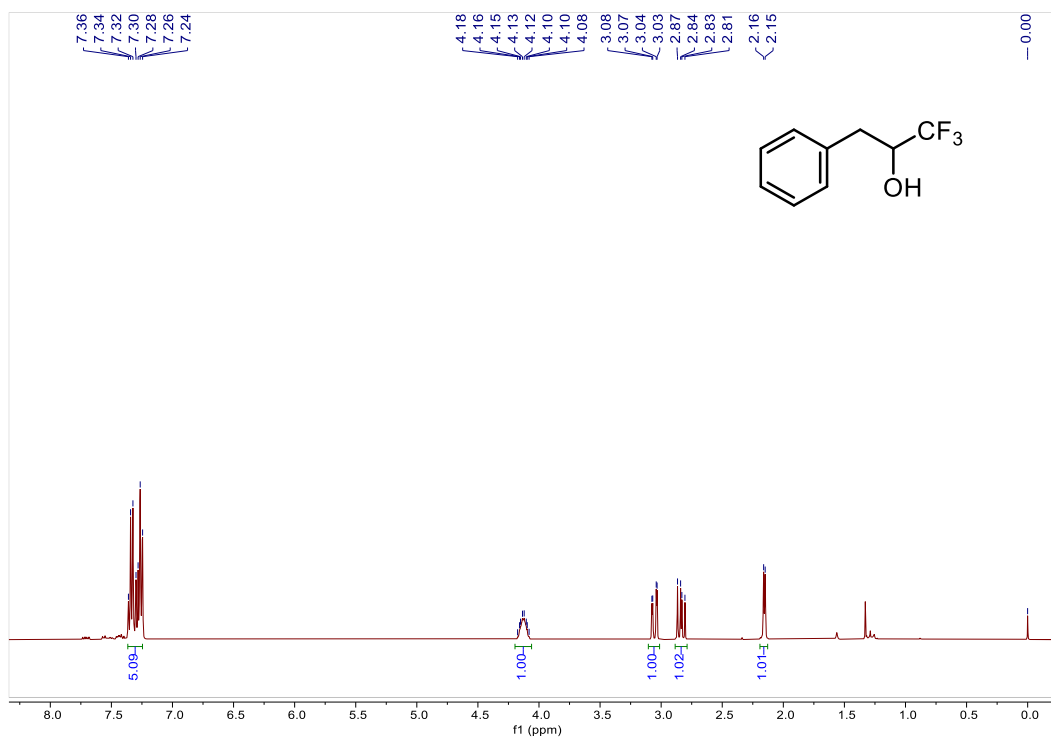

<sup>1</sup>H NMR for compound **2an**

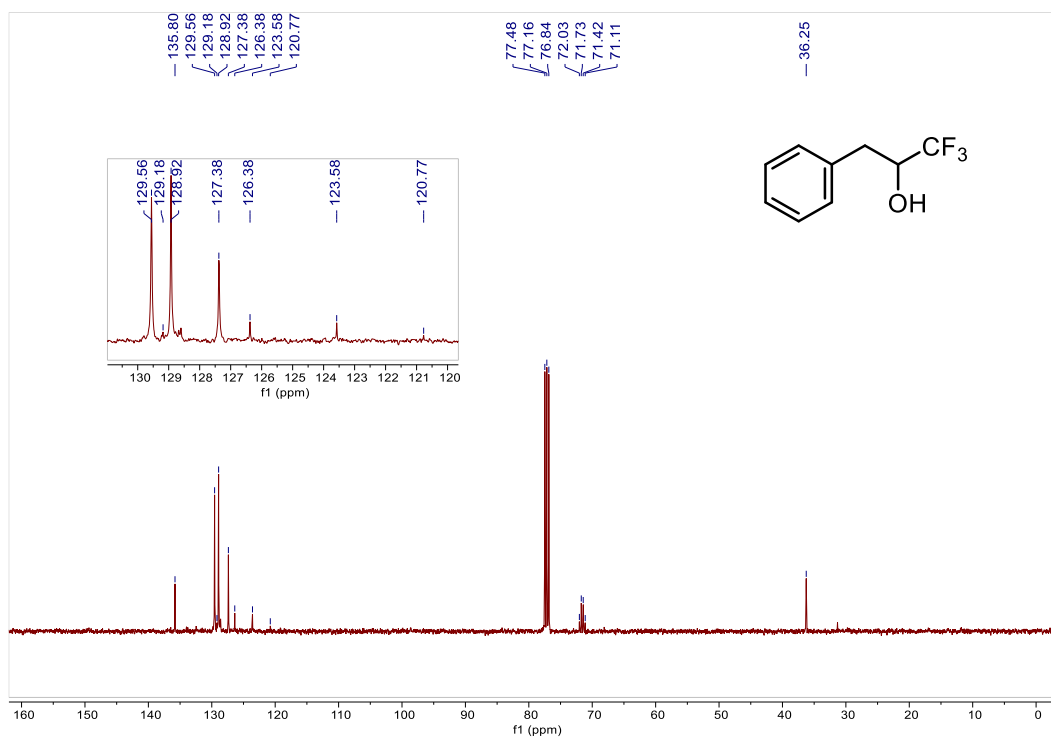

<sup>13</sup>C{<sup>1</sup>H} NMR for compound **2an**

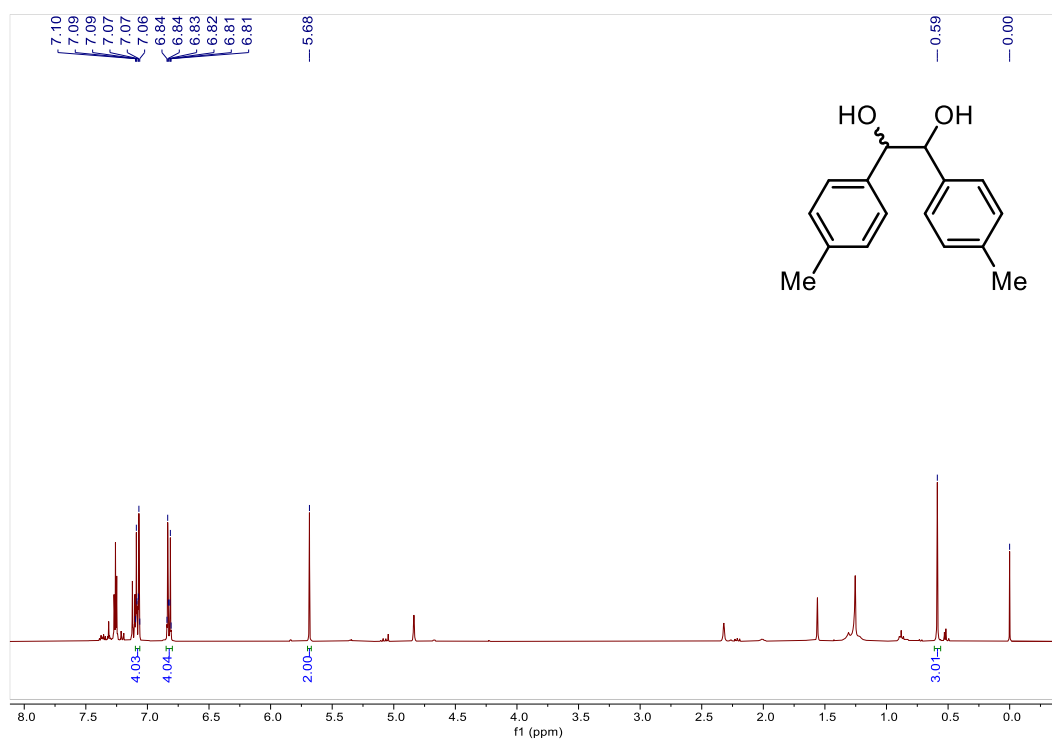

<sup>1</sup>H NMR for compound **3a** (*dl* and *meso*)

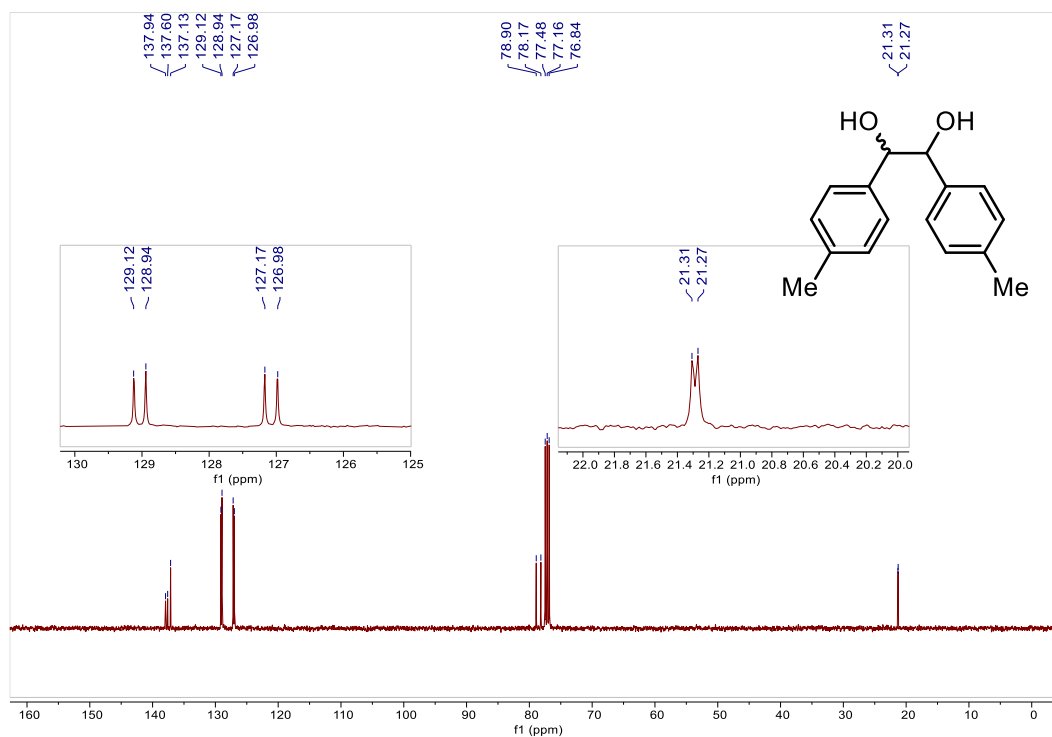

<sup>13</sup>C{<sup>1</sup>H} NMR for compound **3a** (*dl* and *meso*)

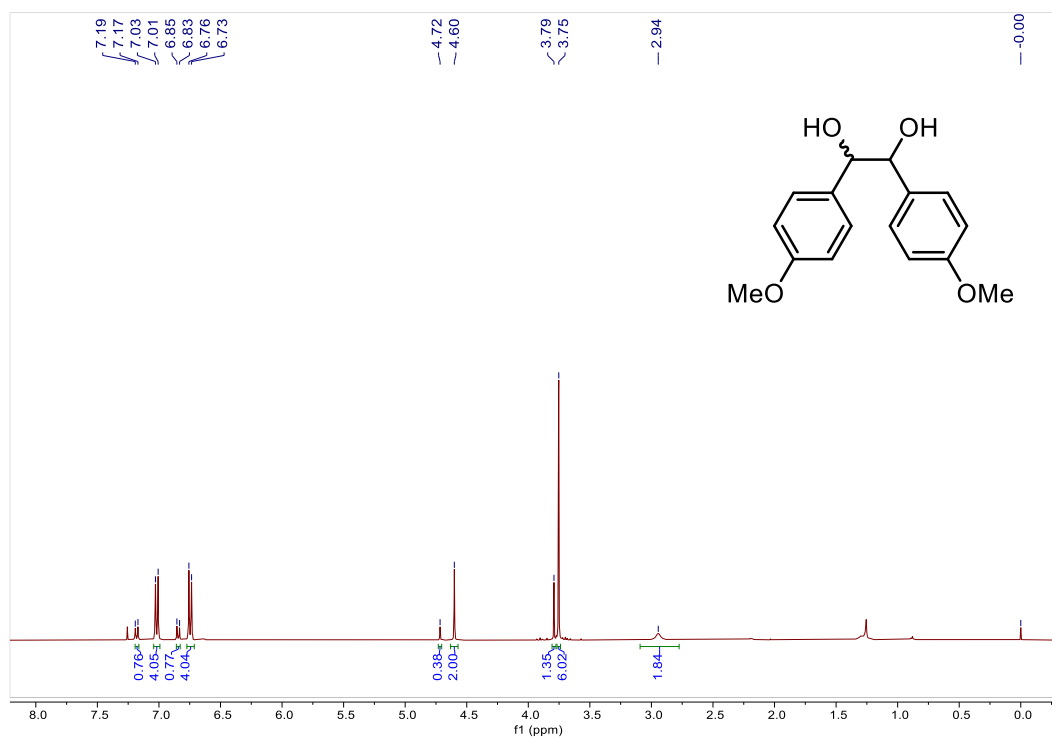

<sup>1</sup>H NMR for compound **3b** (*dl* and *meso*)

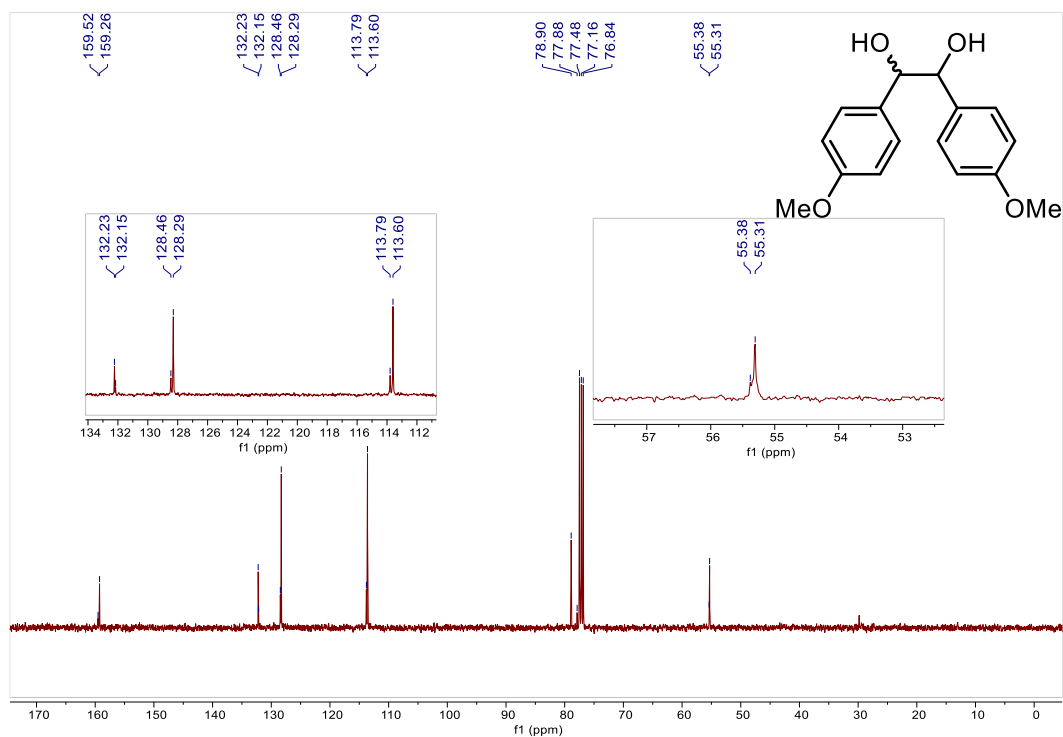

<sup>13</sup>C {<sup>1</sup>H} NMR for compound **3b** (*dl* and *meso*)

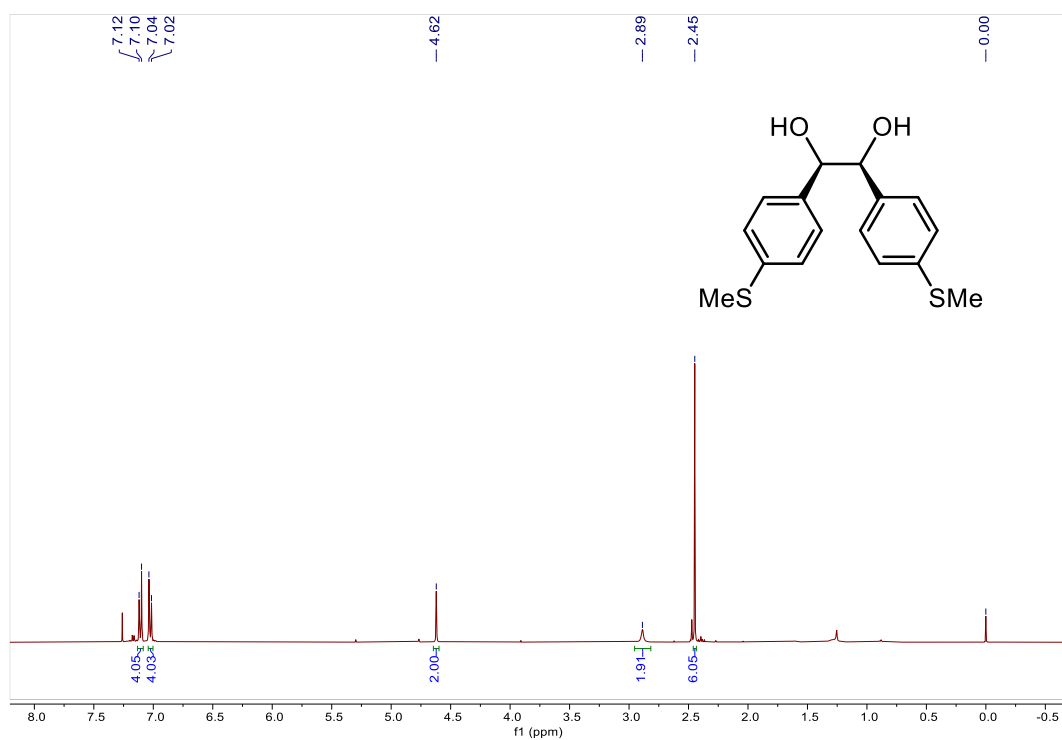

<sup>1</sup>H NMR for compound *meso*-3c

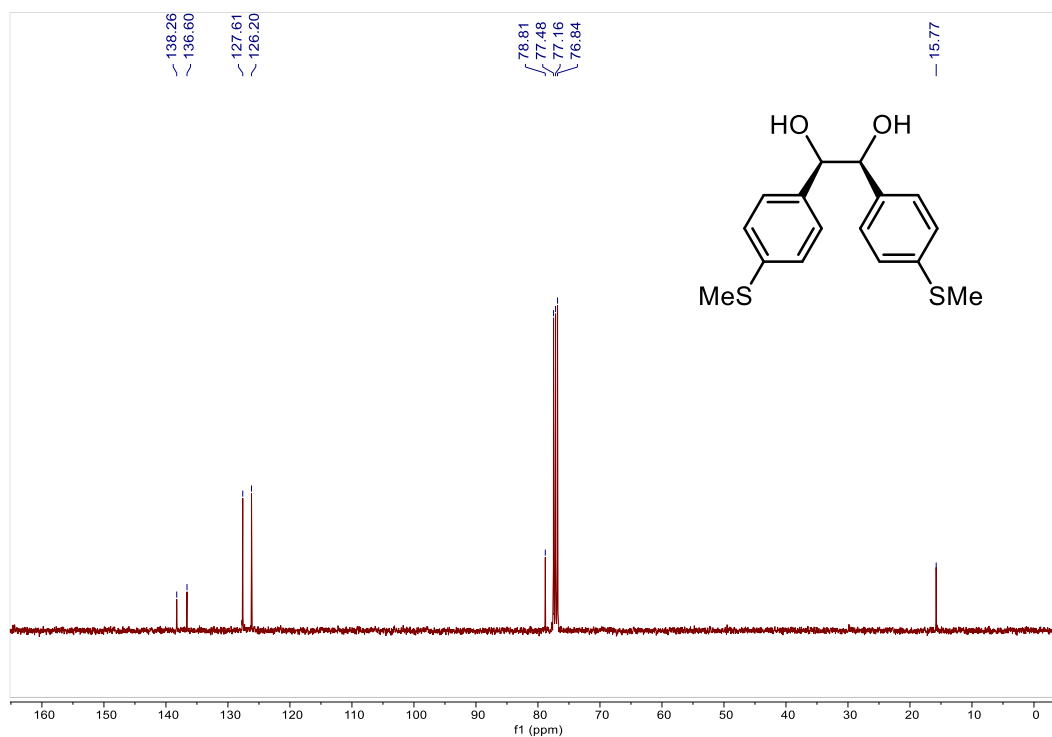

<sup>13</sup>C{<sup>1</sup>H} NMR for compound *meso*-3c

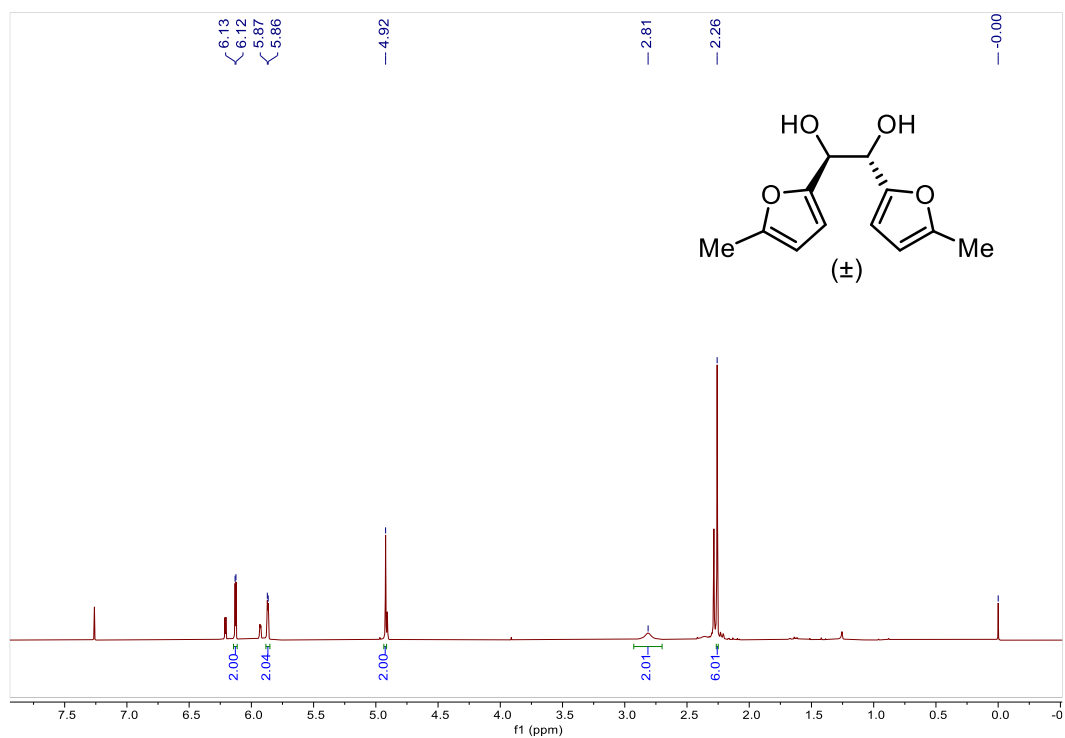

<sup>1</sup>H NMR for compound *dl*-3d

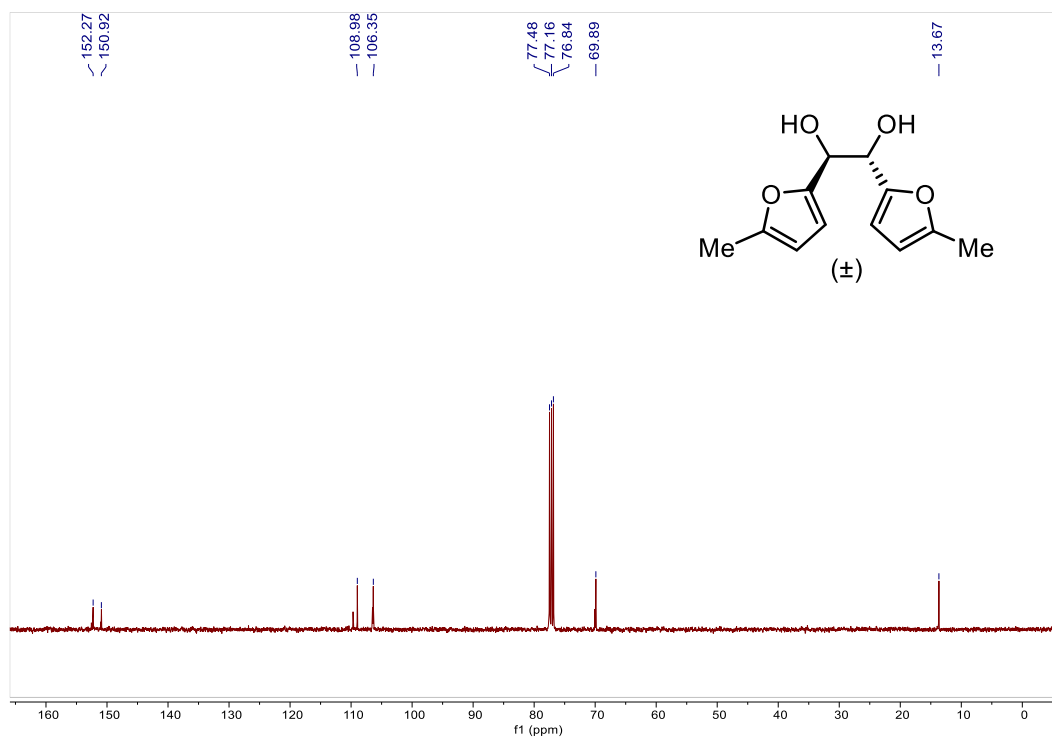

<sup>13</sup>C{<sup>1</sup>H} NMR for compound *dl*-3d

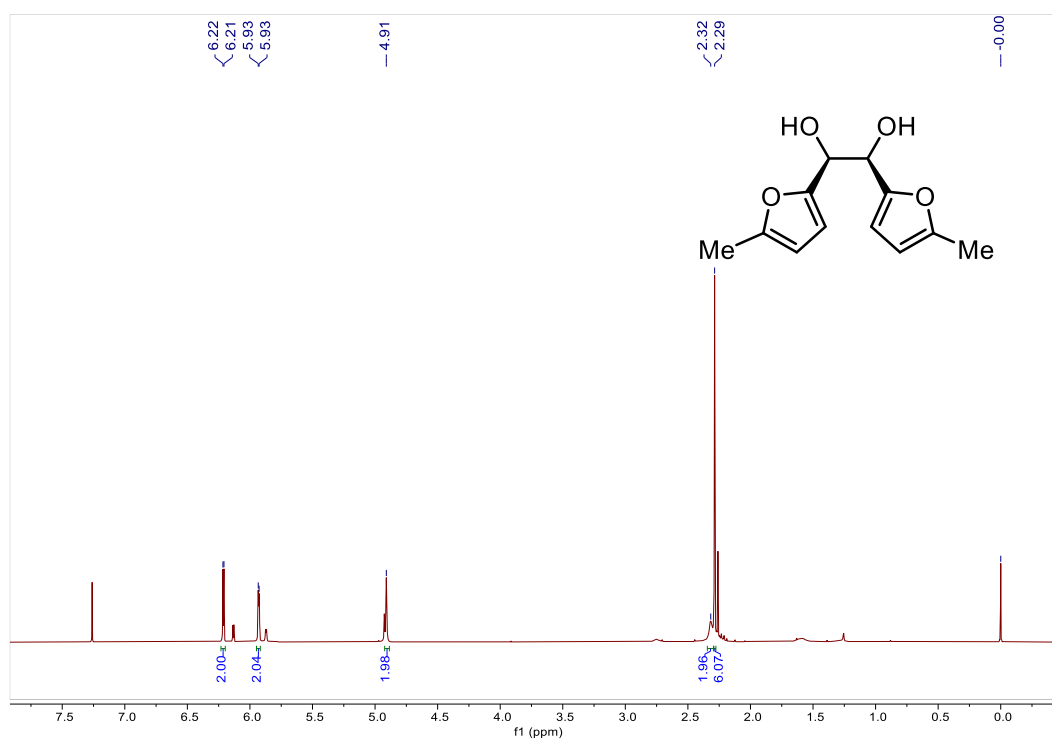

$^1\text{H}$  NMR for compound *meso*-3d

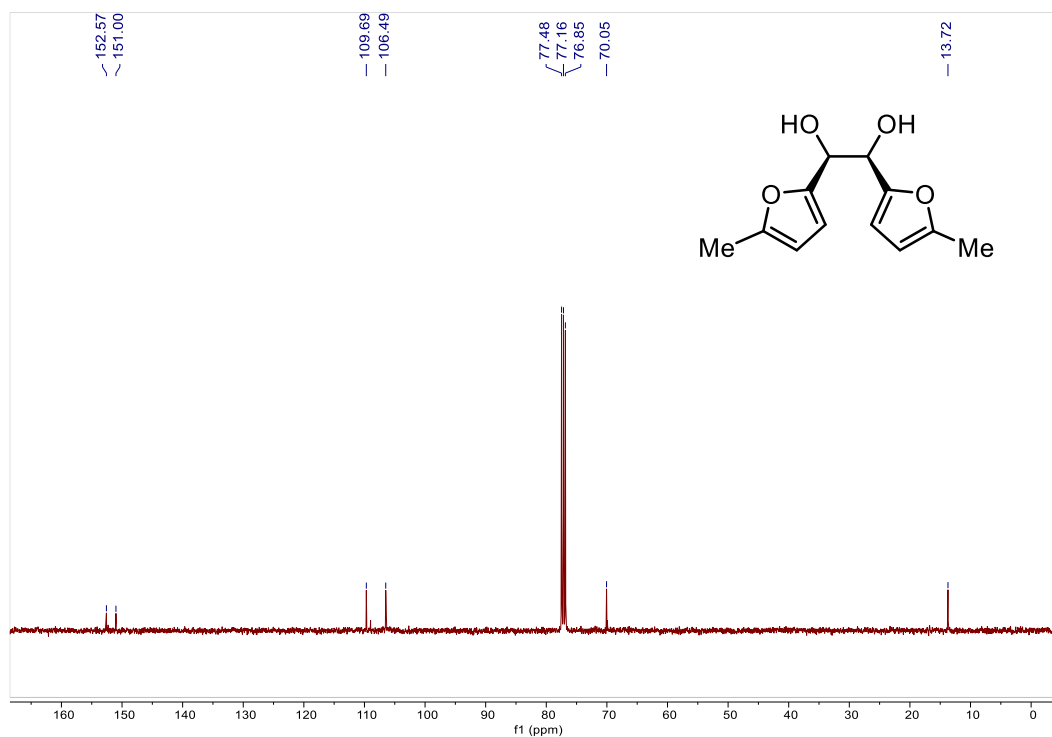

$^{13}\text{C}\{^1\text{H}\}$  NMR for compound *meso*-3d

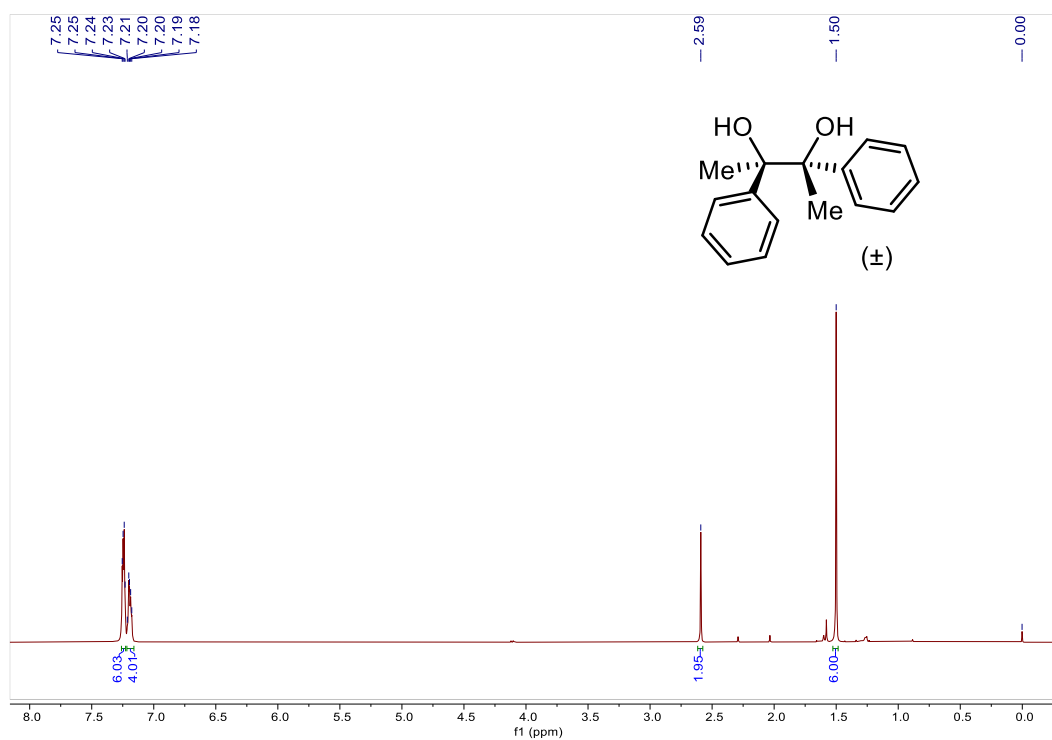

<sup>1</sup>H NMR for compound *dl*-3e

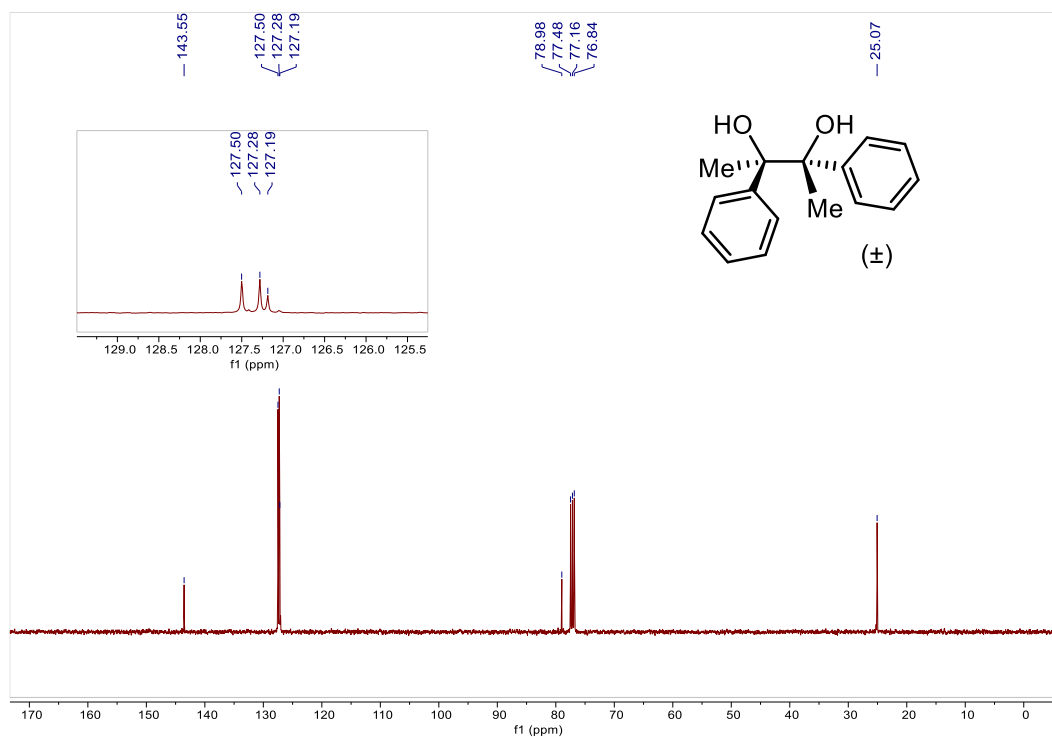

<sup>13</sup>C{<sup>1</sup>H} NMR for compound *dl*-3e



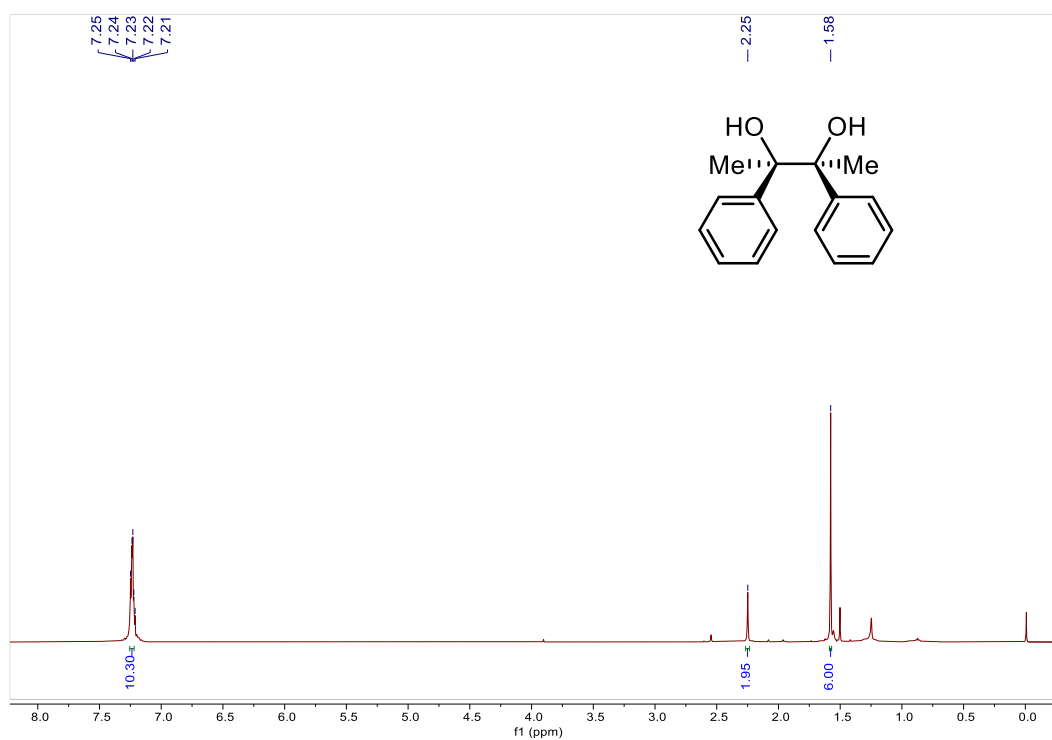

<sup>1</sup>H NMR for compound *meso*-3e

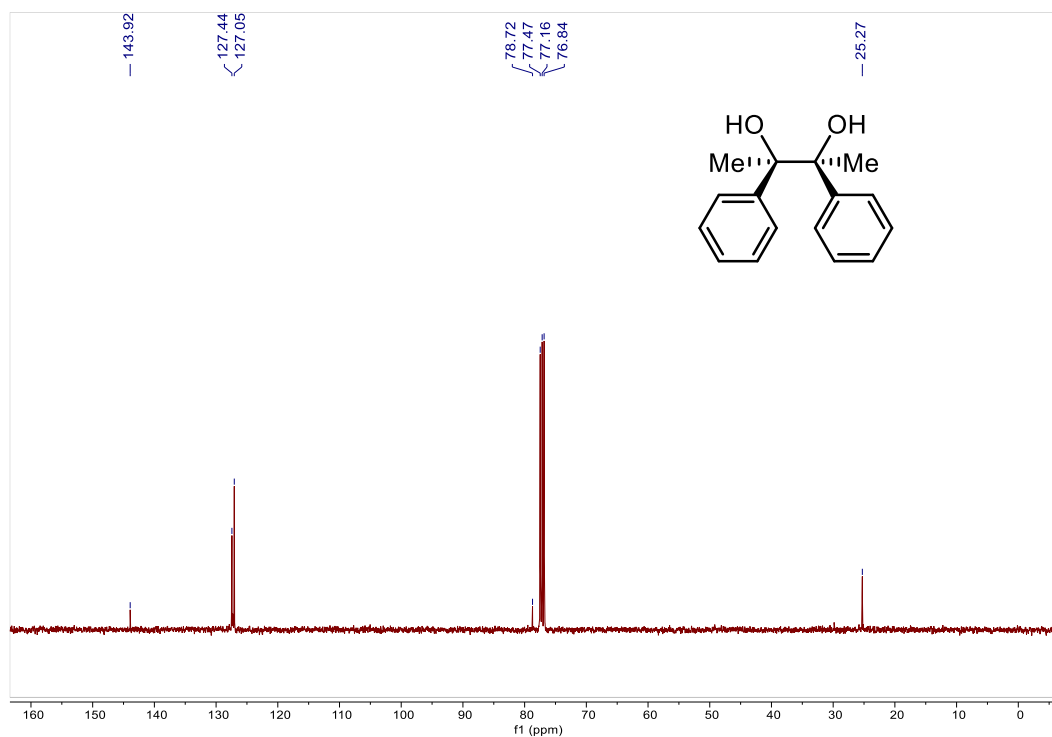

<sup>13</sup>C{<sup>1</sup>H} NMR for compound *meso*-3e

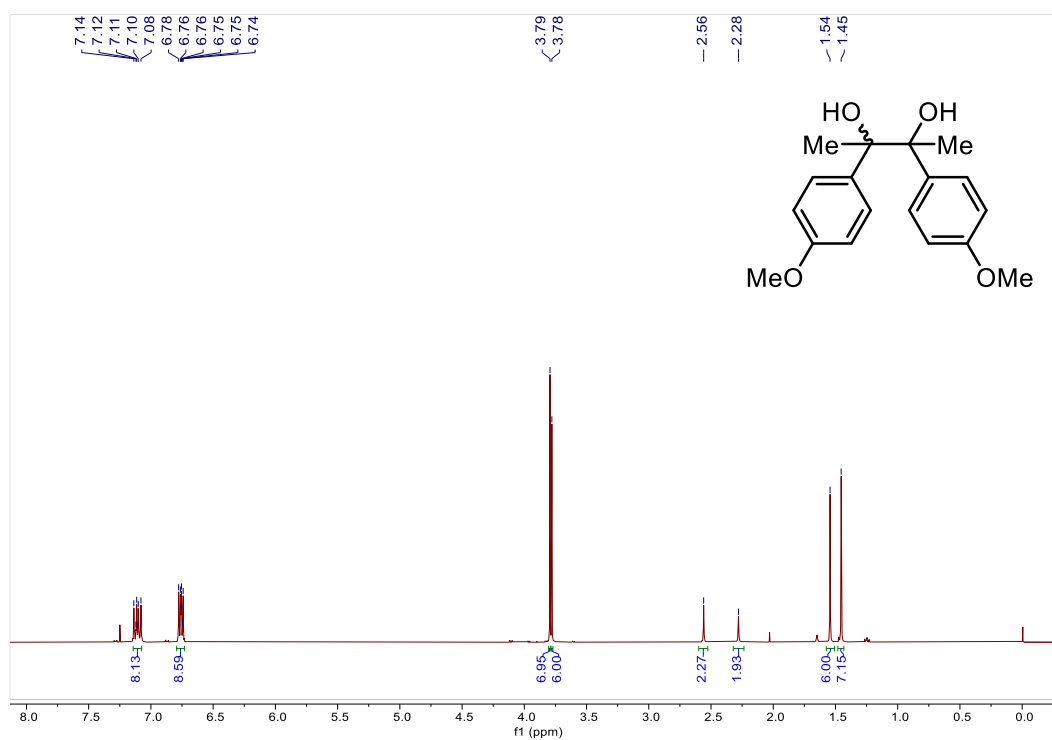

<sup>1</sup>H NMR for compound **3f** (*dl* and *meso*)

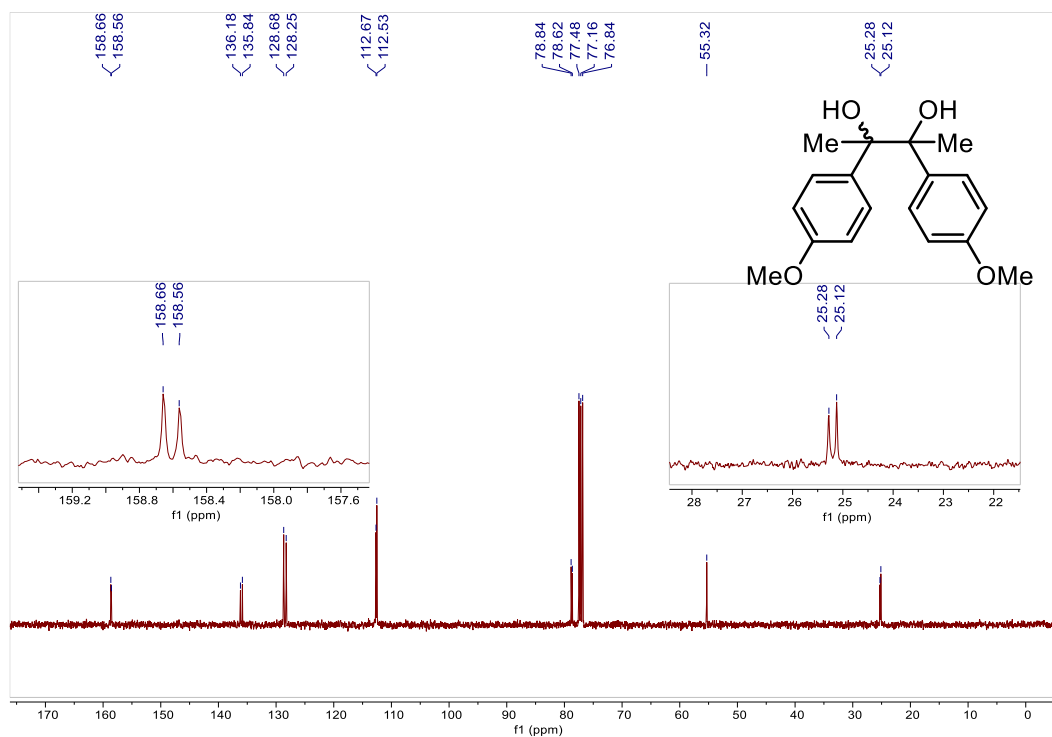

<sup>13</sup>C{<sup>1</sup>H} NMR for compound **3f** (*dl* and *meso*)

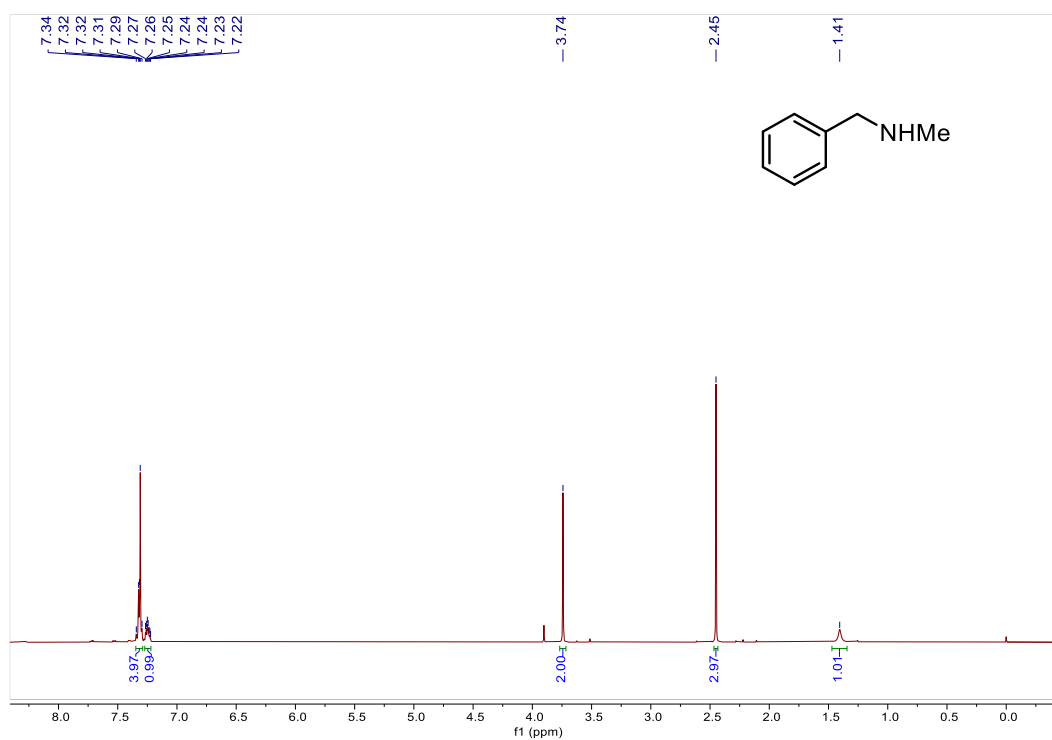

<sup>1</sup>H NMR for compound **4a**

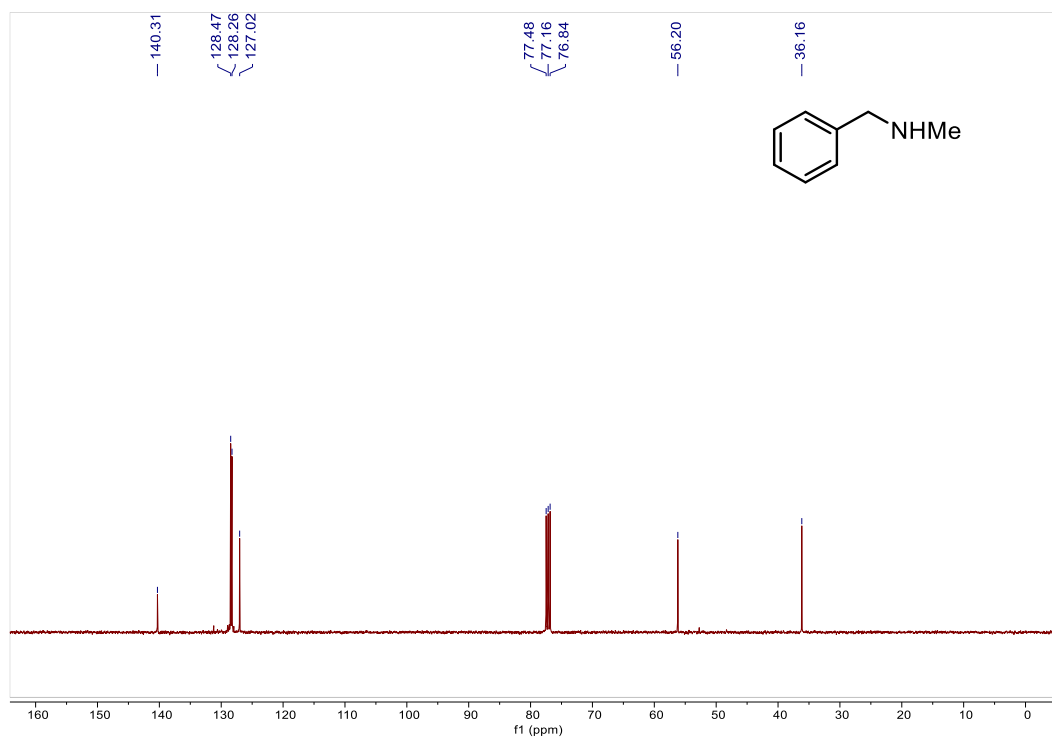

<sup>13</sup>C{<sup>1</sup>H} NMR for compound **4a**

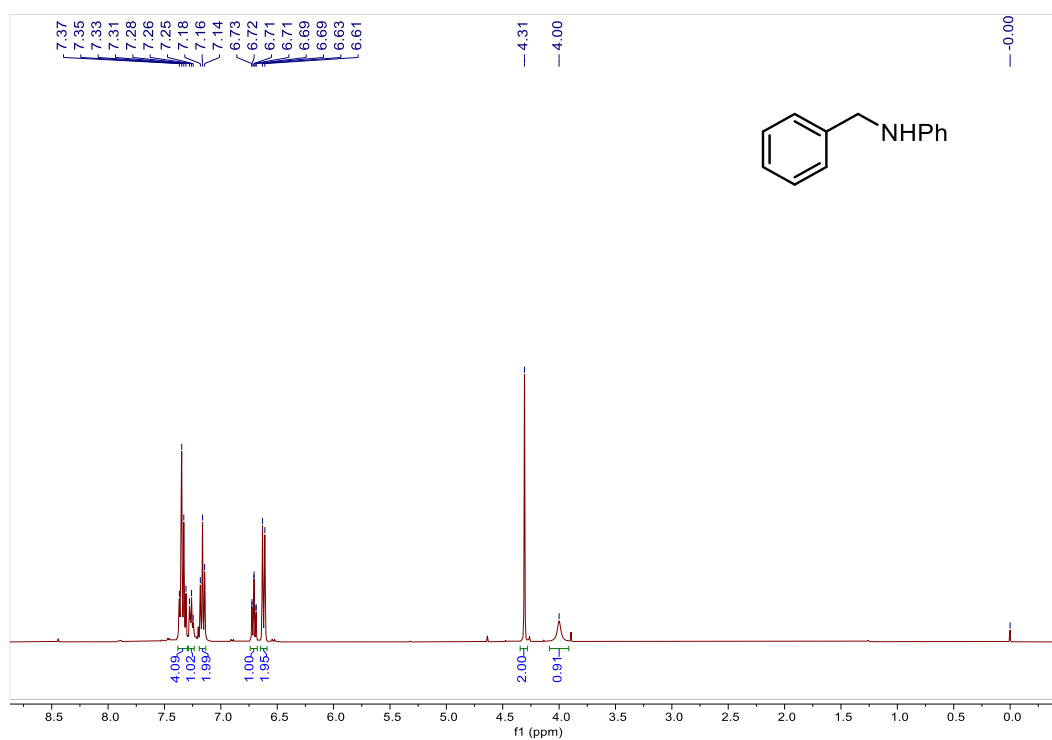

<sup>1</sup>H NMR for compound **4b**

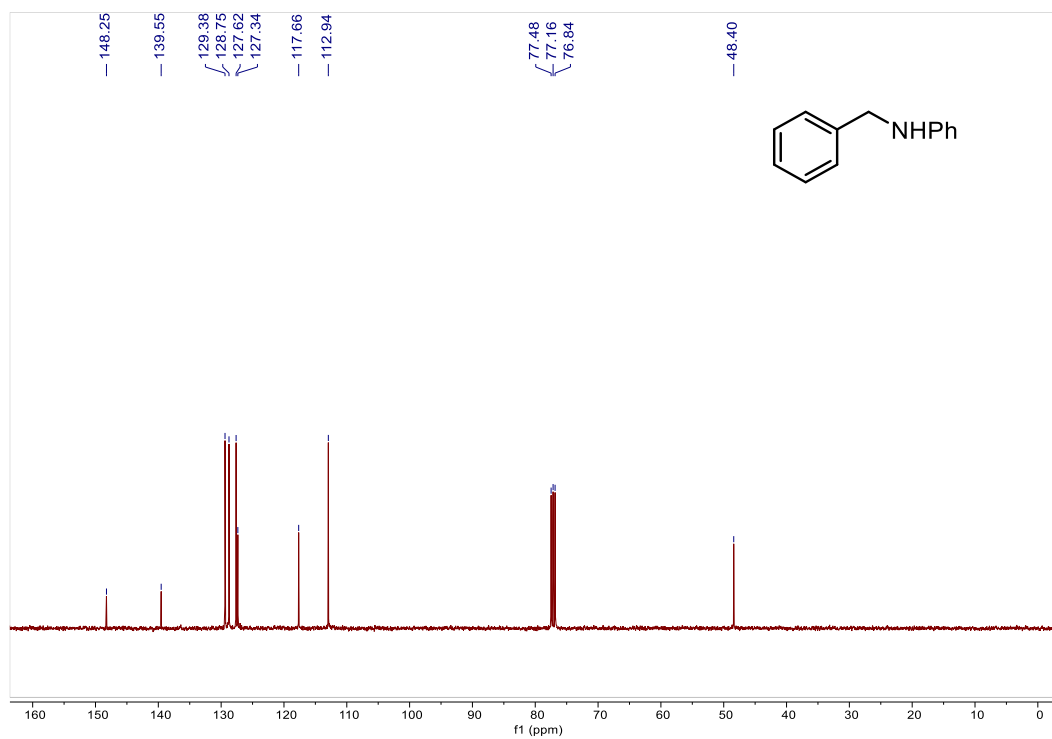

<sup>13</sup>C{<sup>1</sup>H} NMR for compound **4b**

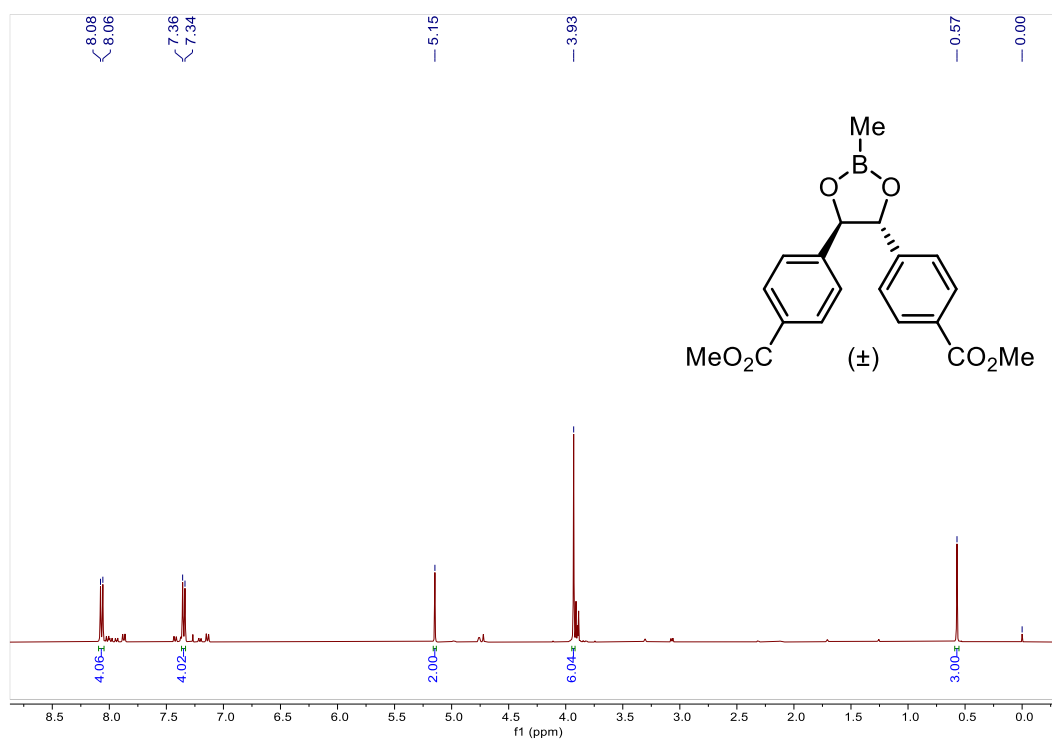

<sup>1</sup>H NMR for compound *dl*-5a

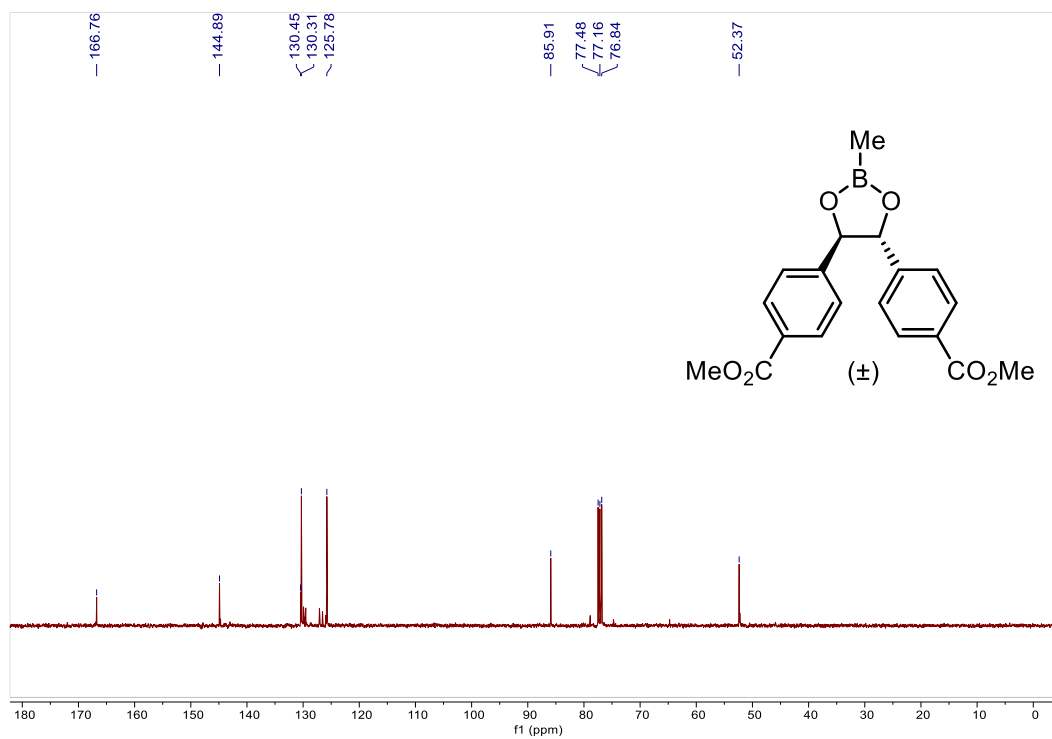

<sup>13</sup>C{<sup>1</sup>H} NMR for compound *dl*-5a

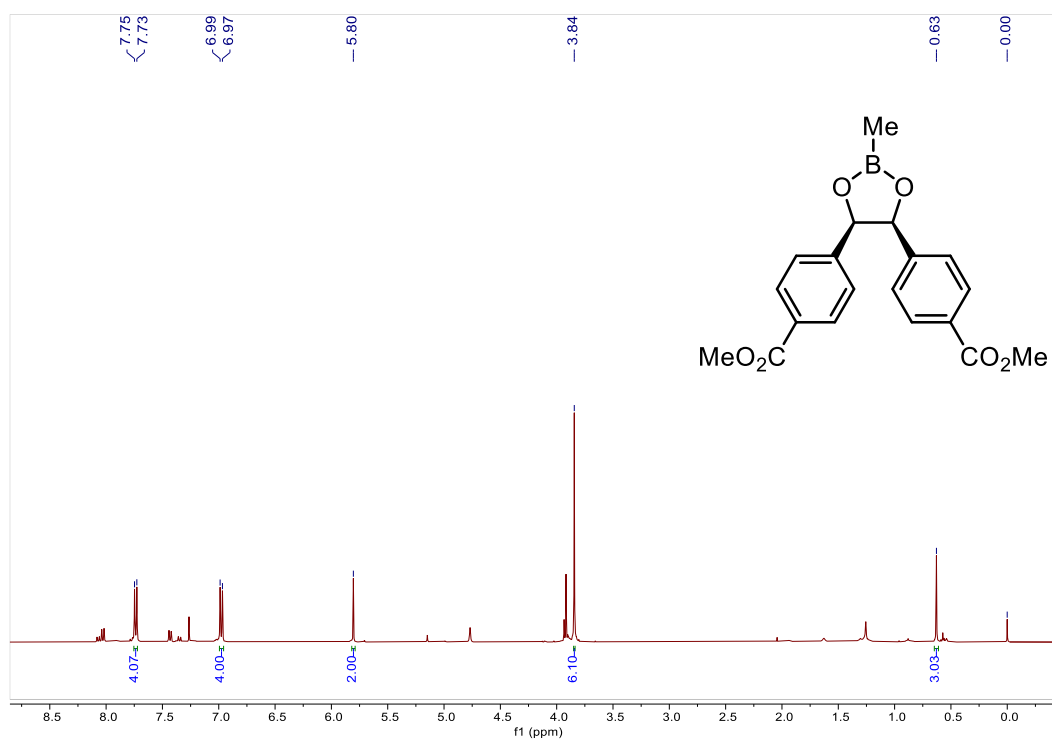

<sup>1</sup>H NMR for compound *meso*-5a

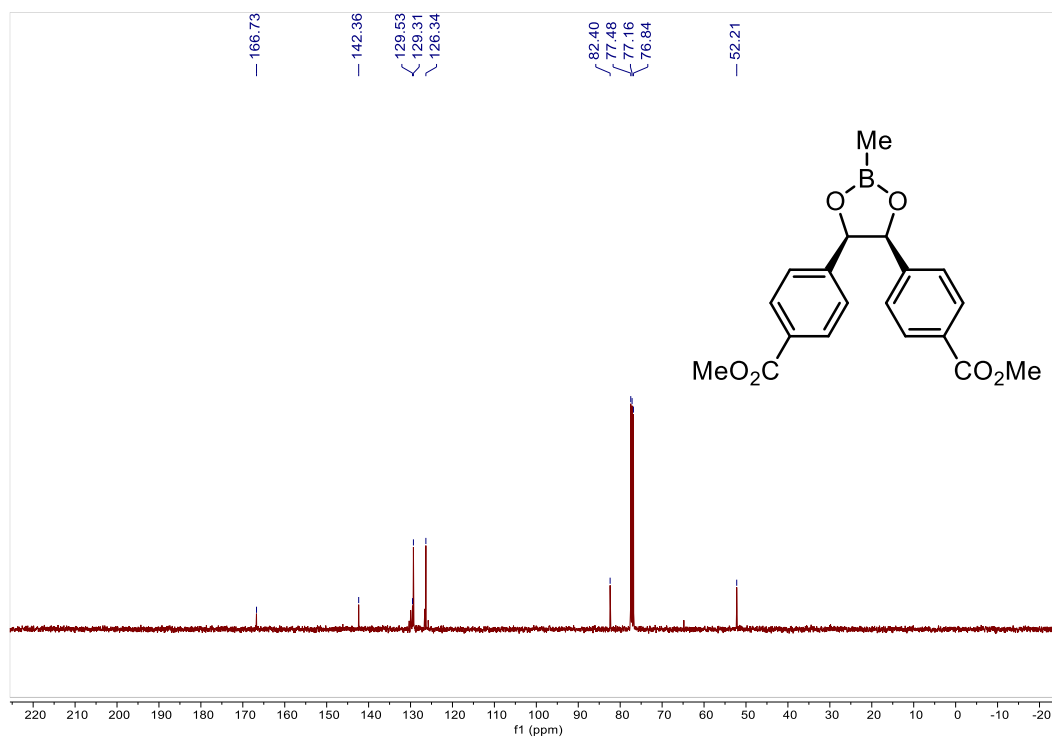

<sup>13</sup>C{<sup>1</sup>H} NMR for compound *meso*-5a

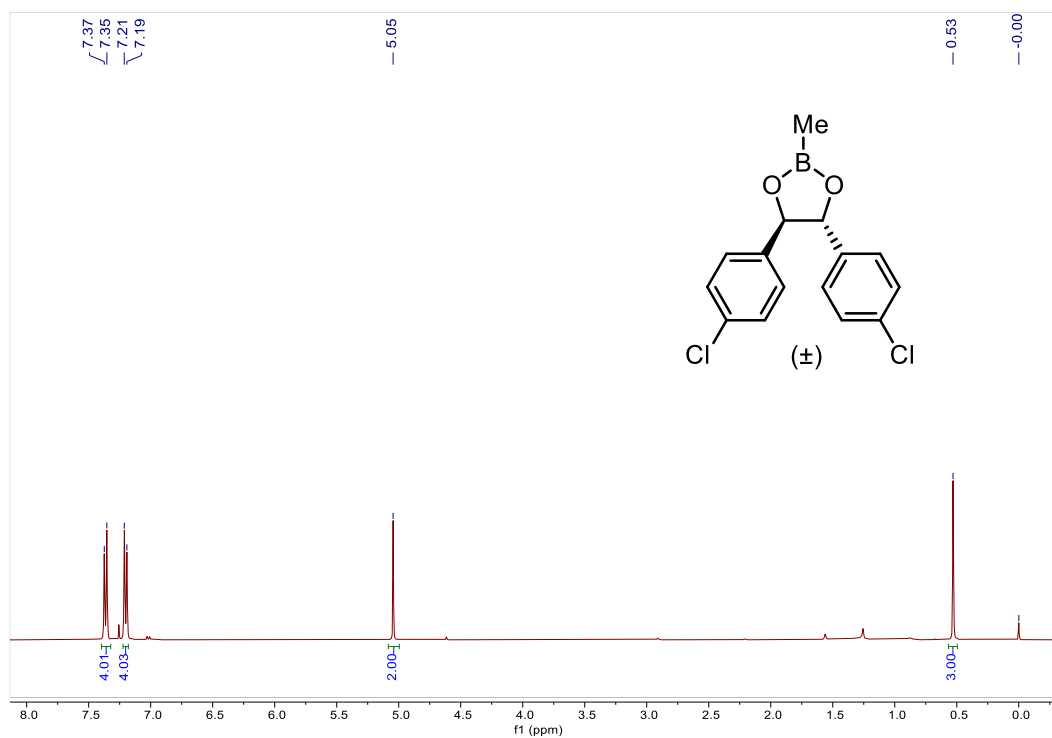

<sup>1</sup>H NMR for compound *dl*-5b

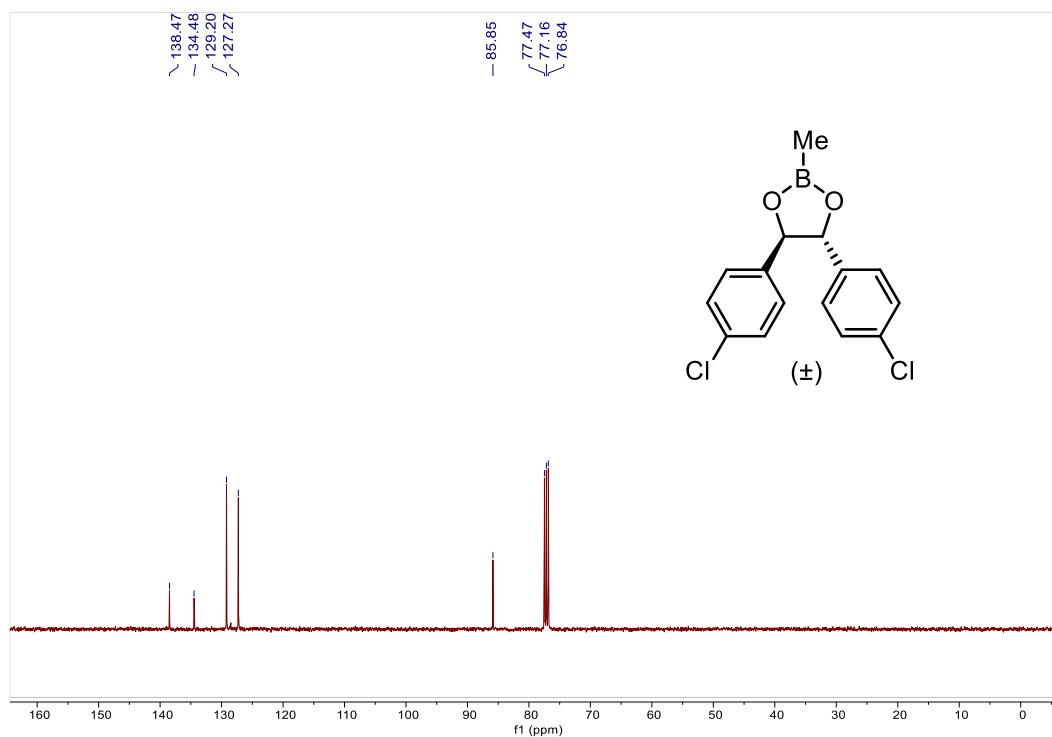

<sup>13</sup>C{<sup>1</sup>H} NMR for compound *dl*-5b

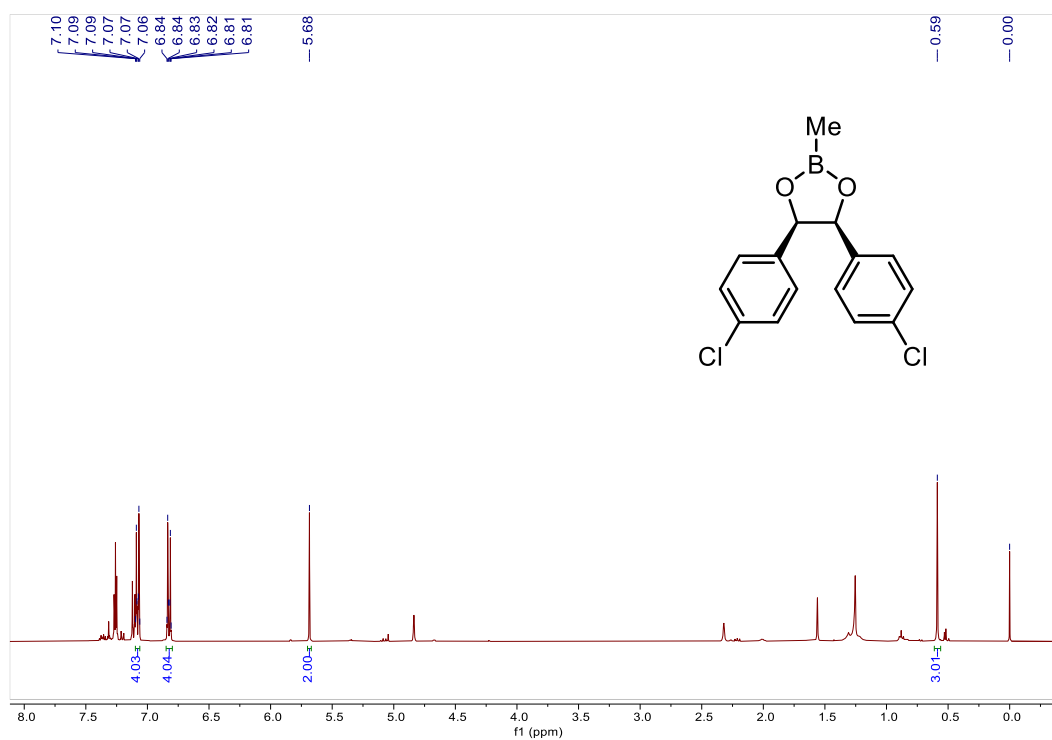

<sup>1</sup>H NMR for compound *meso*-5b

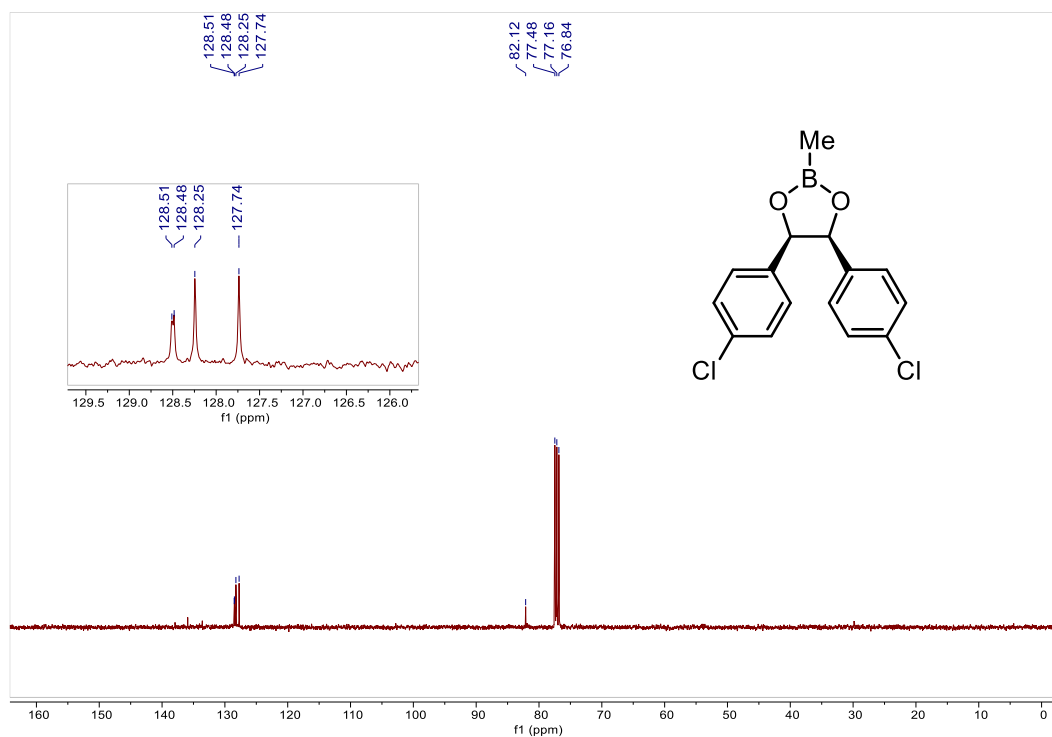

<sup>13</sup>C{<sup>1</sup>H} NMR for compound *meso*-5b



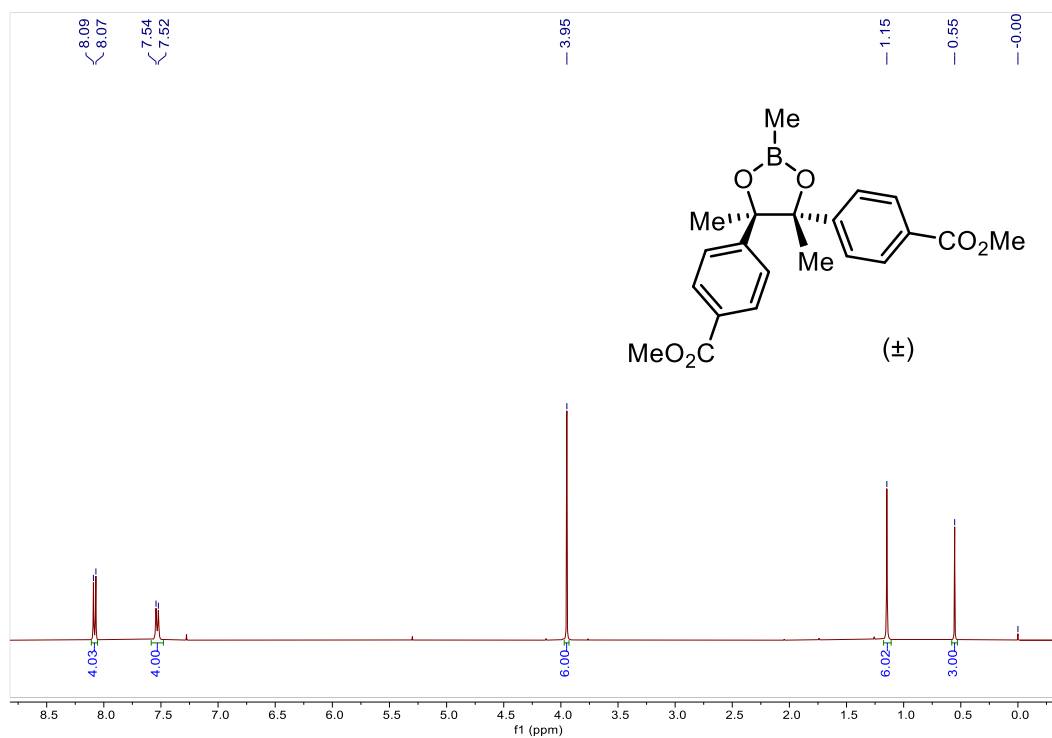

<sup>1</sup>H NMR for compound *dl*-5c

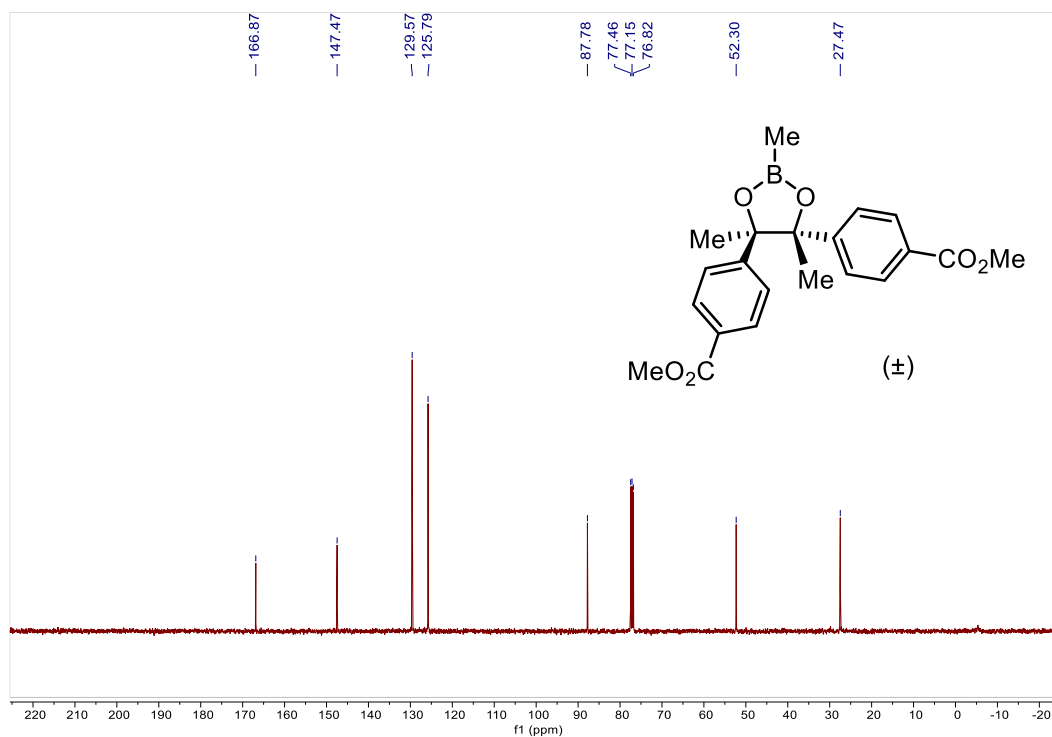

<sup>13</sup>C{<sup>1</sup>H} NMR for compound *dl*-5c

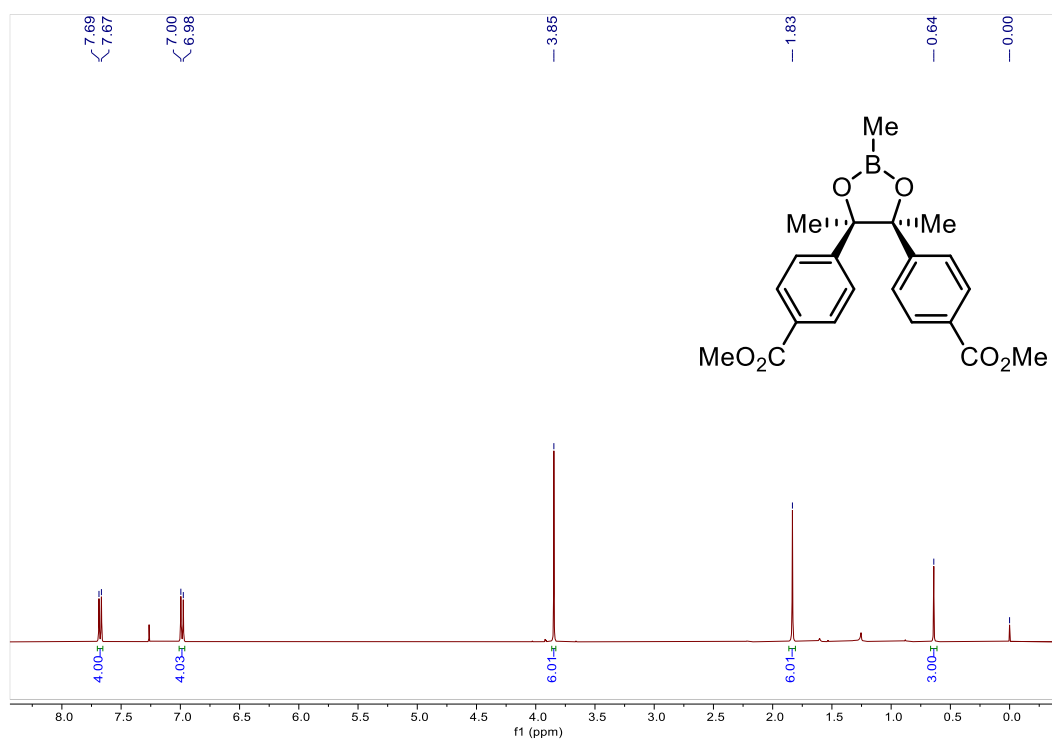

<sup>1</sup>H NMR for compound *meso-5c*

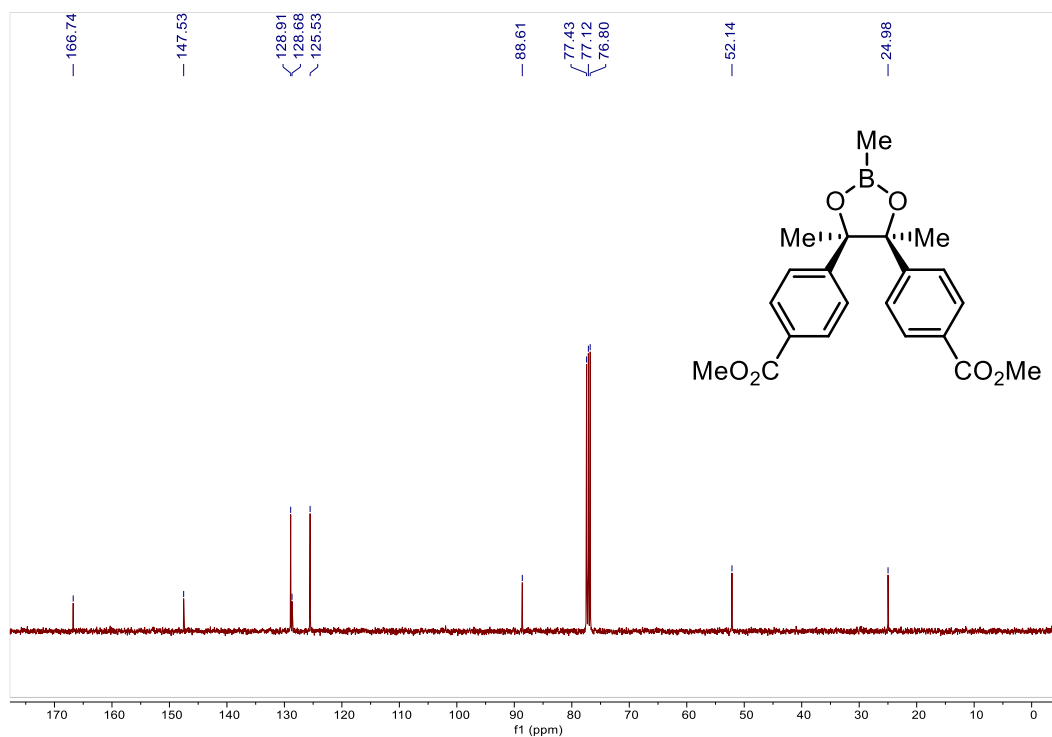

<sup>13</sup>C{<sup>1</sup>H} NMR for compound *meso-5c*

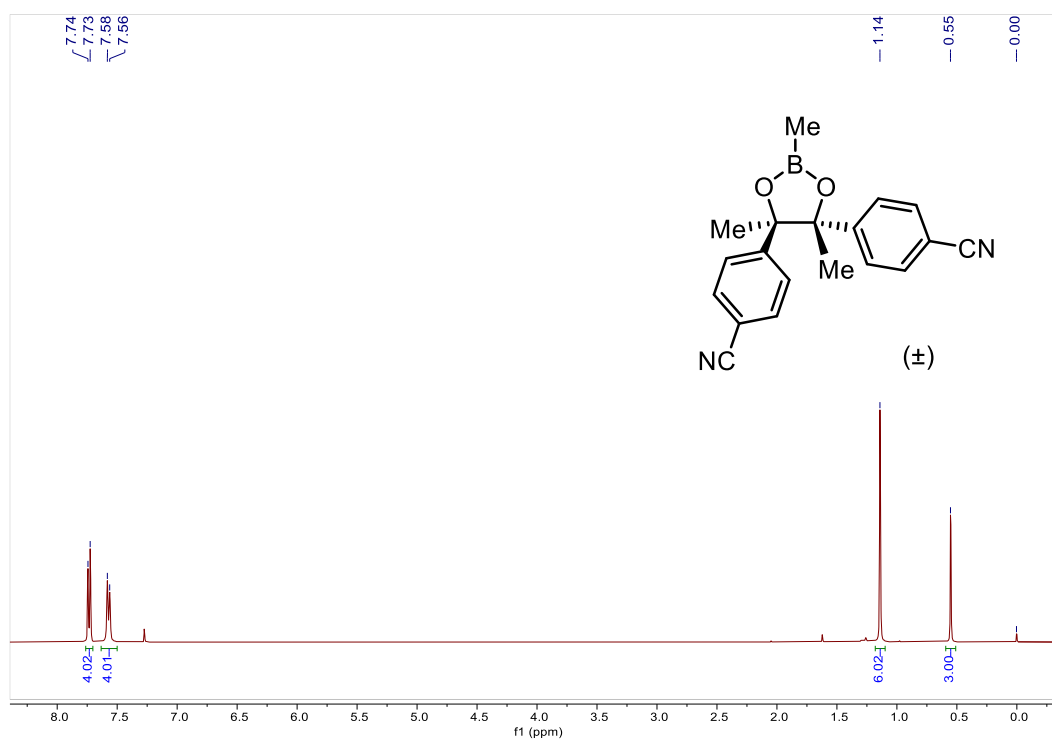

<sup>1</sup>H NMR for compound **dl-5d**

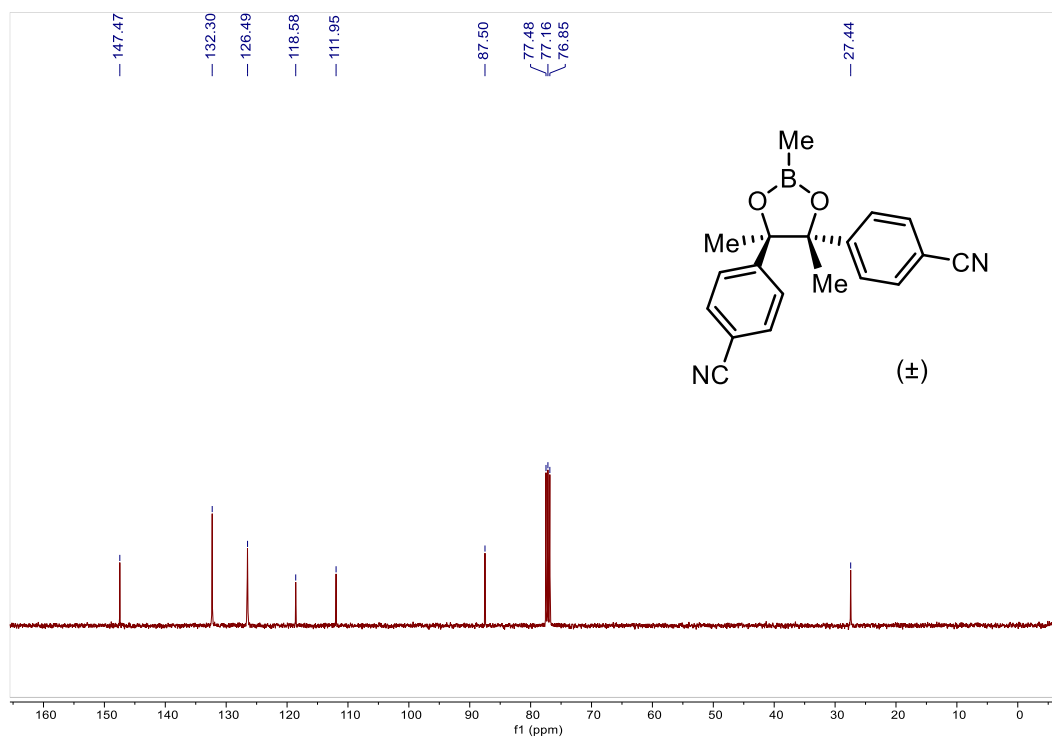

<sup>13</sup>C{<sup>1</sup>H} NMR for compound **dl-5d**

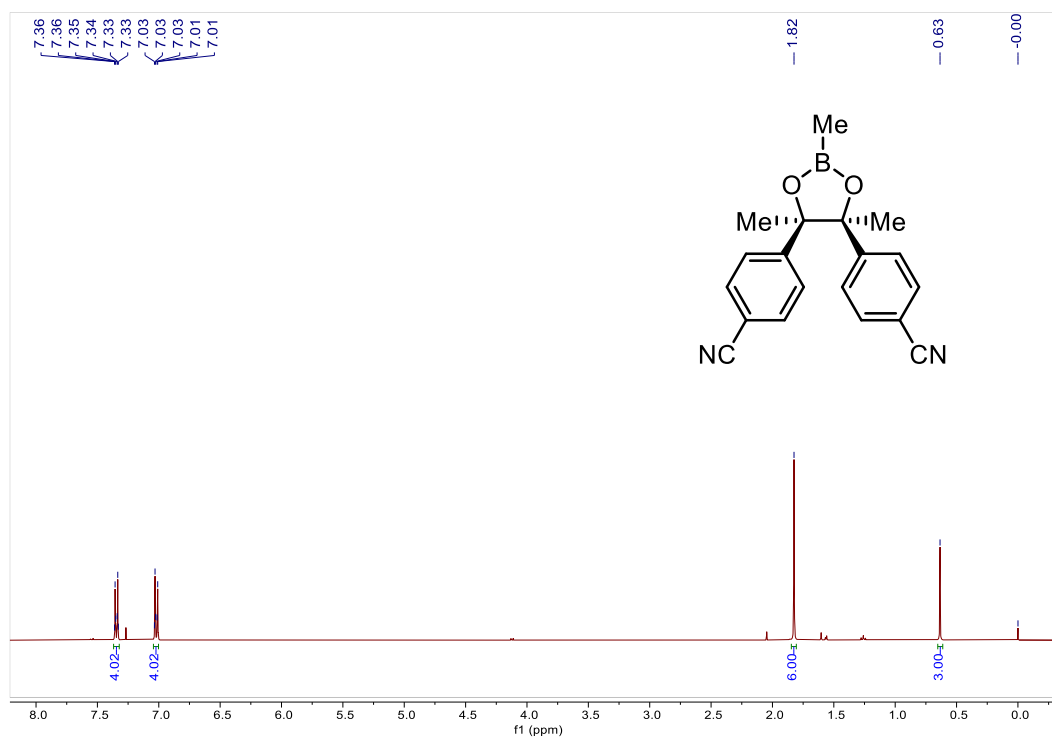

<sup>1</sup>H NMR for compound *meso*-5d

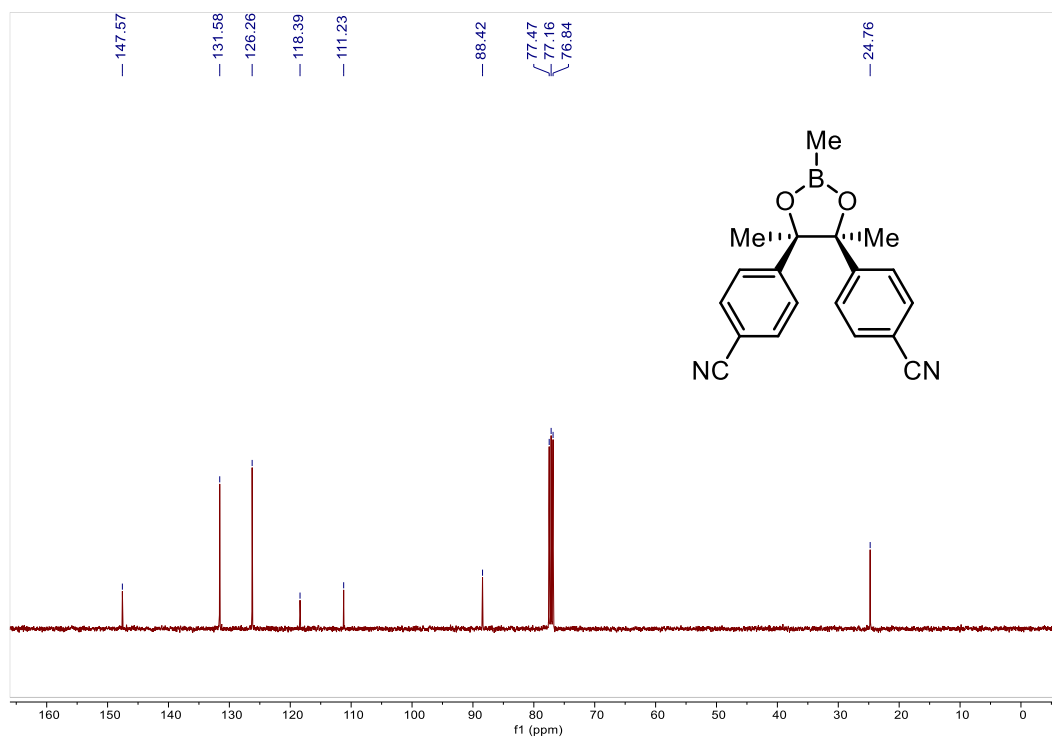

<sup>13</sup>C{<sup>1</sup>H} NMR for compound *meso*-5d
